# Supplementary material for: Dynamic Na+/H+ exchanger 1 (NHE1) – calmodulin complexes of varying stoichiometry and structure regulate Ca2+-dependent NHE1 activation
Source: eLife. 2021 Mar 3;10:e60889. doi: 10.7554/eLife.60889 (PMC8009664; doi:10.7554/eLife.60889)
Supplement: Figure 1—source data 1. [file elife-60889-fig1-data1.xlsx]

## Sheet: ITC_CaM_H1
ITC - CaM (10uM) + H1 (150uM)
run1							run2							run3
dH [µcal/injection]	InjV [uL]	c(H1) [mM]	c(CaM) [mM]	molar ratio	dH/n [cal/mol]		dH [µcal/injection]	InjV [uL]	c(H1) [mM]	c(CaM) [mM]	molar ratio	dH/n [cal/mol]		dH [µcal/injection]	InjV [uL]	c(H1) [mM]	c(CaM) [mM]	molar ratio	dH/n [cal/mol]
-0.39228	0.5	0	0.01	0.03681	--		-0.38605	0.5	0	0.01	0.03681	--		-0.41252	0.5	0	0.01	0.03681	--
-3.98729	2	0.000367197	0.00998	0.18495	-12940.97233		-4.14731	2	0.000367197	0.00998	0.18495	-13324.37086		-4.44211	2	0.000367197	0.00998	0.18495	-14407.04926
-4.13495	2	0.00183	0.00988	0.33453	-13433.1723		-4.20888	2	0.00183	0.00988	0.33453	-13529.6135		-4.48625	2	0.00183	0.00988	0.33453	-14554.18013
-4.2648	2	0.00327	0.00978	0.48556	-13865.99111		-4.29512	2	0.00327	0.00978	0.48556	-13817.07831		-4.53839	2	0.00327	0.00978	0.48556	-14727.97091
-4.26351	2	0.0047	0.00969	0.63802	-13861.70701		-4.22827	2	0.0047	0.00969	0.63802	-13594.24547		-4.64748	2	0.0047	0.00969	0.63802	-15091.6152
-4.44392	2	0.00612	0.00959	0.79193	-14463.06162		-4.42638	2	0.00612	0.00959	0.79193	-14254.58739		-4.74333	2	0.00612	0.00959	0.79193	-15411.11382
-4.35995	2	0.00752	0.0095	0.94728	-14183.17271		-4.40675	2	0.00752	0.0095	0.94728	-14189.15792		-4.71783	2	0.00752	0.0095	0.94728	-15326.0933
-4.32159	2	0.00891	0.00941	1.10407	-14055.31441		-4.49731	2	0.00891	0.00941	1.10407	-14491.04756		-4.77636	2	0.00891	0.00941	1.10407	-15521.18535
-4.41091	2	0.01028	0.00931	1.2623	-14353.04089		-4.47224	2	0.01028	0.00931	1.2623	-14407.45615		-4.86094	2	0.01028	0.00931	1.2623	-15803.12426
-4.51261	2	0.01164	0.00922	1.42197	-14692.03365		-4.61298	2	0.01164	0.00922	1.42197	-14876.61627		-4.73076	2	0.01164	0.00922	1.42197	-15369.18917
-4.36301	2	0.01299	0.00913	1.58309	-14193.35746		-4.48932	2	0.01299	0.00913	1.58309	-14464.40179		-4.52807	2	0.01299	0.00913	1.58309	-14693.55621
-3.91448	2	0.01432	0.00904	1.74565	-12698.26585		-4.33195	2	0.01432	0.00904	1.74565	-13939.84669		-4.31803	2	0.01432	0.00904	1.74565	-13993.44815
-3.16349	2	0.01563	0.00895	1.90965	-10194.95428		-3.61319	2	0.01563	0.00895	1.90965	-11543.96389		-2.71148	2	0.01563	0.00895	1.90965	-8638.27366
-1.41715	2	0.01693	0.00887	2.07509	-4373.82526		-1.89703	2	0.01693	0.00887	2.07509	-5823.42956		-0.85878	2	0.01693	0.00887	2.07509	-2462.61341
-0.4996	2	0.01822	0.00878	2.24197	-1315.33806		-0.59921	2	0.01822	0.00878	2.24197	-1497.35479		-0.36708	2	0.01822	0.00878	2.24197	-823.58746
-0.24524	2	0.01949	0.00869	2.4103	-467.46284		-0.28733	2	0.01949	0.00869	2.4103	-457.77005		-0.26708	2	0.01949	0.00869	2.4103	-490.26746
-0.1874	2	0.02075	0.00861	2.58006	-274.65117		-0.20024	2	0.02075	0.00861	2.58006	-167.46936		-0.14367	2	0.02075	0.00861	2.58006	-78.90763
-0.18505	2	0.02199	0.00852	2.75127	-266.82967		-0.16646	2	0.02199	0.00852	2.75127	-54.87291		-0.1786	2	0.02199	0.00852	2.75127	-195.33436
-0.17247	2	0.02322	0.00844	2.92392	-224.90861		-0.15777	2	0.02322	0.00844	2.92392	-25.88549		-0.12987	2	0.02322	0.00844	2.92392	-32.88531
-0.09641	2	0.02444	0.00836	3.09801	28.62523		-0.20125	2	0.02444	0.00836	3.09801	-170.84507		-0.12467	2	0.02444	0.00836	3.09801	-15.5539
	--	0.02564	0.00828	--				--	0.02564	0.00828	--				--	0.02564	0.00828	--

## Sheet: ITC_CaM_H2
ITC - CaM (50uM) + H2 (670uM)
run1							run2							run3
dH [µcal/injection]	InjV [uL]	c(H2) [mM]	c(CaM) [mM]	molar ratio	dH/n [cal/mol]		dH [µcal/injection]	InjV [uL]	c(H2) [mM]	c(CaM) [mM]	molar ratio	dH/n [cal/mol]		dH [µcal/injection]	InjV [uL]	c(H2) [mM]	c(CaM) [mM]	molar ratio	dH/n [cal/mol]
-1.67925	0.5	0	0.05	0.03288	--		-1.82737	0.5	0	0.05	0.03288	--		-1.9259	0.5	0	0.05	0.03288	--
-18.4108	2.5	0.00164	0.04988	0.19851	-6691.52713		-16.6347	2.5	0.00164	0.04988	0.19851	-5531.1681		-16.4322	2.5	0.00164	0.04988	0.19851	-5410.2863
-17.5472	2.5	0.00978	0.04927	0.36614	-6175.94484		-16.0931	2.5	0.00978	0.04927	0.36614	-5207.8112		-15.8574	2.5	0.00978	0.04927	0.36614	-5067.12184
-16.4085	2.5	0.01782	0.04867	0.53579	-5496.1354		-15.4245	2.5	0.01782	0.04867	0.53579	-4808.65048		-15.1667	2.5	0.01782	0.04867	0.53579	-4654.74698
-15.6952	2.5	0.02576	0.04808	0.70746	-5070.28047		-14.7978	2.5	0.02576	0.04808	0.70746	-4434.53427		-14.5854	2.5	0.02576	0.04808	0.70746	-4307.68418
-14.2814	2.5	0.0336	0.04749	0.88113	-4226.18681		-13.6755	2.5	0.0336	0.04749	0.88113	-3764.49593		-13.7479	2.5	0.0336	0.04749	0.88113	-3807.72498
-13.0469	2.5	0.04134	0.04691	1.05682	-3489.20763		-12.9918	2.5	0.04134	0.04691	1.05682	-3356.32069		-12.5035	2.5	0.04134	0.04691	1.05682	-3064.78596
-11.7985	2.5	0.04897	0.04634	1.23452	-2743.90511		-11.8729	2.5	0.04897	0.04634	1.23452	-2688.28264		-11.6509	2.5	0.04897	0.04634	1.23452	-2555.7776
-10.6639	2.5	0.05651	0.04577	1.41423	-2066.50942		-10.9547	2.5	0.05651	0.04577	1.41423	-2140.11673		-10.6827	2.5	0.05651	0.04577	1.41423	-1977.71616
-9.87114	2.5	0.06395	0.04522	1.59595	-1593.21549		-10.2655	2.5	0.06395	0.04522	1.59595	-1728.66237		-10.1584	2.5	0.06395	0.04522	1.59595	-1664.72887
-9.30855	2.5	0.07128	0.04466	1.77969	-1257.34115		-9.6336	2.5	0.07128	0.04466	1.77969	-1351.40575		-9.70659	2.5	0.07128	0.04466	1.77969	-1394.97716
-8.77387	2.5	0.07852	0.04412	1.96544	-938.12931		-9.2878	2.5	0.07852	0.04412	1.96544	-1144.95408		-9.06039	2.5	0.07852	0.04412	1.96544	-1009.18788
-8.39801	2.5	0.08565	0.04358	2.1532	-713.73465		-8.76596	2.5	0.08565	0.04358	2.1532	-833.4067		-8.78828	2.5	0.08565	0.04358	2.1532	-846.73593
-8.13852	2.5	0.09268	0.04304	2.34297	-558.81831		-8.42457	2.5	0.09268	0.04304	2.34297	-629.59107		-8.37067	2.5	0.09268	0.04304	2.34297	-597.41675
-7.70709	2.5	0.09962	0.04252	2.53476	-301.25		-8.03199	2.5	0.09962	0.04252	2.53476	-395.22079		-7.99965	2.5	0.09962	0.04252	2.53476	-375.9112
-7.58952	2.5	0.10645	0.042	2.72856	-231.05377		-7.79135	2.5	0.10645	0.042	2.72856	-251.5549		-7.69556	2.5	0.10645	0.042	2.72856	-194.36275
	--	0.11318	0.04148	--				--	0.11318	0.04148	--				--	0.11318	0.04148	--

## Sheet: ITC_CaM_H1H2
ITC - CaM (10uM) + H1H2 (150uM)
run1							run2							run3
dH [µcal/injection]	InjV [uL]	c(H1H2) [mM]	c(CaM) [mM]	molar ratio	dH/n [cal/mol]		dH [µcal/injection]	InjV [uL]	c(H1H2) [mM]	c(CaM) [mM]	molar ratio	dH/n [cal/mol]		dH [µcal/injection]	InjV [uL]	c(H1H2) [mM]	c(CaM) [mM]	molar ratio	dH/n [cal/mol]
-0.49638	0.5	0	0.01	0.03681	--		-0.73216	0.5	0	0.01	0.03681	--		-0.76782	0.5	0	0.01	0.03681	--
-5.81528	2	0.000367197	0.00998	0.18495	-19384.27159		-5.70539	2	0.000367197	0.00998	0.18495	-19017.98043		-6.23021	2	0.000367197	0.00998	0.18495	-20767.35326
-5.92615	2	0.00183	0.00988	0.33453	-19753.81928		-5.62192	2	0.00183	0.00988	0.33453	-18739.73767		-6.35133	2	0.00183	0.00988	0.33453	-21171.0936
-5.87657	2	0.00327	0.00978	0.48556	-19588.55655		-5.71161	2	0.00327	0.00978	0.48556	-19038.69595		-6.49593	2	0.00327	0.00978	0.48556	-21653.09869
-5.96272	2	0.0047	0.00969	0.63802	-19875.74566		-5.77418	2	0.0047	0.00969	0.63802	-19247.26901		-6.46152	2	0.0047	0.00969	0.63802	-21538.40996
-5.79561	2	0.00612	0.00959	0.79193	-19318.71239		-5.89836	2	0.00612	0.00959	0.79193	-19661.18397		-6.43216	2	0.00612	0.00959	0.79193	-21440.53462
-5.70471	2	0.00752	0.0095	0.94728	-19015.706		-5.79525	2	0.00752	0.0095	0.94728	-19317.48748		-6.23504	2	0.00752	0.0095	0.94728	-20783.45736
-5.34994	2	0.00891	0.00941	1.10407	-17833.12034		-5.22149	2	0.00891	0.00941	1.10407	-17404.97065		-4.90623	2	0.00891	0.00941	1.10407	-16354.10579
-4.11985	2	0.01028	0.00931	1.2623	-13732.83191		-4.14096	2	0.01028	0.00931	1.2623	-13803.20563		-4.30319	2	0.01028	0.00931	1.2623	-14343.95942
-4.02458	2	0.01164	0.00922	1.42197	-13415.26071		-4.00965	2	0.01164	0.00922	1.42197	-13365.50771		-4.23659	2	0.01164	0.00922	1.42197	-14121.97813
-3.83756	2	0.01299	0.00913	1.58309	-12791.88287		-3.80899	2	0.01299	0.00913	1.58309	-12696.64217		-4.01986	2	0.01299	0.00913	1.58309	-13399.53352
-3.56726	2	0.01432	0.00904	1.74565	-11890.87792		-3.63241	2	0.01432	0.00904	1.74565	-12108.02665		-3.70678	2	0.01432	0.00904	1.74565	-12355.92205
-3.42187	2	0.01563	0.00895	1.90965	-11406.22525		-3.36739	2	0.01563	0.00895	1.90965	-11224.63653		-3.17842	2	0.01563	0.00895	1.90965	-10594.74025
-3.04798	2	0.01693	0.00887	2.07509	-10159.94877		-3.20682	2	0.01693	0.00887	2.07509	-10689.38638		-2.60509	2	0.01693	0.00887	2.07509	-8683.64193
-2.40076	2	0.01822	0.00878	2.24197	-8002.53299		-2.5385	2	0.01822	0.00878	2.24197	-8461.66061		-1.87467	2	0.01822	0.00878	2.24197	-6248.89772
-1.79181	2	0.01949	0.00869	2.4103	-5972.69694		-1.82001	2	0.01949	0.00869	2.4103	-6066.71604		-1.23714	2	0.01949	0.00869	2.4103	-4123.79751
-1.28206	2	0.02075	0.00861	2.58006	-4273.52241		-1.1883	2	0.02075	0.00861	2.58006	-3960.99142		-0.82984	2	0.02075	0.00861	2.58006	-2766.12666
-0.92206	2	0.02199	0.00852	2.75127	-3073.52925		-1.00065	2	0.02199	0.00852	2.75127	-3335.49968		-0.66287	2	0.02199	0.00852	2.75127	-2209.58041
-0.56322	2	0.02322	0.00844	2.92392	-1877.40377		-0.67891	2	0.02322	0.00844	2.92392	-2263.02213		-0.44248	2	0.02322	0.00844	2.92392	-1474.93003
-0.37016	2	0.02444	0.00836	3.09801	-1233.86941		-0.42412	2	0.02444	0.00836	3.09801	-1413.74908		-0.28503	2	0.02444	0.00836	3.09801	-950.08601
	--	0.02564	0.00828	--				--	0.02564	0.00828	--				--	0.02564	0.00828	--
