# Supplementary material for: Dynamic Na+/H+ exchanger 1 (NHE1) – calmodulin complexes of varying stoichiometry and structure regulate Ca2+-dependent NHE1 activation
Source: eLife. 2021 Mar 3;10:e60889. doi: 10.7554/eLife.60889 (PMC8009664; doi:10.7554/eLife.60889)
Supplement: Figure 3—source data 1. [file elife-60889-fig3-data1.xlsx]

## Sheet: 40uM CaM 15N
x, gradient strength [G/cm]	f(x), Intensity		Fitted function:	f (x) = Io * exp (-D * x^2 * gamma^2 * littleDelta^2 (bigDelta-littleDelta/3)* 10^4
0.963	24048842178		used gamma:	26752 rad/(s*Gauss)
2.454	23168481057		used little delta:	0.0030000 s
3.945	21853478983		used big delta:	0.19990 s
5.436	22870093290		used gradient strength:	variable
6.927	22083551395		Random error estimation of data:	RMS per spectrum (or trace/plane)
8.418	20019767214		Systematic error estimation of data:	worst case per peak scenario
9.91	19353317949		Fit parameter Error estimation method:	from fit using arbitray y uncertainties
11.401	18006152397		Confidence level:	95
12.892	16607095361		Used peaks:
14.383	15727202080		Used integrals:	area integral
15.874	13740490798		Used Gradient strength:	all values (including replicates) used
17.365	13464127868
18.856	11167091231		Fitting results:
20.347	10258221314			Io	error Io	D [m2/s]	error D
21.838	8299056690			2.3588e+10	4.94108e+08	1.57942e-10	7.58928e-12
23.329	8574281113
24.821	5978018002
26.312	5334409884
27.803	4920061671
29.294	5110198672
30.785	4300793697
32.276	2877686204
33.767	2126562729
35.258	1843986473
36.749	1346209255
38.24	2109276086
39.732	-101489859
41.223	410952393
42.714	1602671424
44.205	-319350519
45.696	591375902
47.187	703176123

## Sheet: 40uM CaM 15N + 40uM H1H2
x, gradient strength [G/cm]	f(x), Intensity		Fitted function:	f (x) = Io * exp (-D * x^2 * gamma^2 * littleDelta^2 (bigDelta-littleDelta/3)* 10^4
0.963	9777209130		used gamma:	26752 rad/(s*Gauss)
2.454	9485585105		used little delta:	0.0030000 s
3.945	9715795594		used big delta:	0.19990 s
5.436	9448260340		used gradient strength:	variable
6.927	8529528680		Random error estimation of data:	RMS per spectrum (or trace/plane)
8.418	8720501156		Systematic error estimation of data:	worst case per peak scenario
9.91	8152093781		Fit parameter Error estimation method:	from fit using arbitray y uncertainties
11.401	7818296857		Confidence level:	95
12.892	7294576550		Used peaks:
14.383	6431346798		Used integrals:	area integral
15.874	5749074258		Used Gradient strength:	all values (including replicates) used
17.365	5627452973
18.856	4826647421		Fitting results:
20.347	4534480130			Io	error Io	D [m2/s]	error D
21.838	4139827744			9.72141e+09	1.9492e+08	1.42802e-10	6.57893e-12
23.329	3391442567
24.821	3356120484
26.312	2637284378
27.803	2193273552
29.294	1657659673
30.785	1710018720
32.276	1701562090
33.767	1707853719
35.258	1208050910
36.749	879117792
38.24	775995823
39.732	691628902
41.223	380512913
42.714	734639820
44.205	203586142
45.696	738167211
47.187	-13301873

## Sheet: 40uM CaM 15N +80uM H1H2
x, gradient strength [G/cm]	f(x), Intensity		Fitted function:	f (x) = Io * exp (-D * x^2 * gamma^2 * littleDelta^2 (bigDelta-littleDelta/3)* 10^4
0.963	6065859533		used gamma:	26752 rad/(s*Gauss)
2.454	6280729990		used little delta:	0.0030000 s
3.945	6134521995		used big delta:	0.19990 s
5.436	5917494726		used gradient strength:	variable
6.927	5629324965		Random error estimation of data:	RMS per spectrum (or trace/plane)
8.418	5487083945		Systematic error estimation of data:	worst case per peak scenario
9.91	5100778405		Fit parameter Error estimation method:	from fit using arbitray y uncertainties
11.401	4655899996		Confidence level:	95
12.892	4741497047		Used peaks:
14.383	4148247619		Used integrals:	area integral
15.874	4273551481		Used Gradient strength:	all values (including replicates) used
17.365	3799493133
18.856	3384975533		Fitting results:
20.347	3010721933			Io	error Io	D [m2/s]	error D
21.838	2618804747			6.07772e+09	1.47887e+08	1.19867e-10	6.73943e-12
23.329	2839175839
24.821	2543173976
26.312	1869363832
27.803	2093653343
29.294	1805942105
30.785	1393105290
32.276	1309507691
33.767	737542675
35.258	858299623
36.749	1044916424
38.24	757723555
39.732	720844682
41.223	456096488
42.714	466631072
44.205	116423535
45.696	538361528
47.187	344098022
