# Supplementary material for: Dynamic Na+/H+ exchanger 1 (NHE1) – calmodulin complexes of varying stoichiometry and structure regulate Ca2+-dependent NHE1 activation
Source: eLife. 2021 Mar 3;10:e60889. doi: 10.7554/eLife.60889 (PMC8009664; doi:10.7554/eLife.60889)
Supplement: Figure 3—source data 2. [file elife-60889-fig3-data2.xlsx]

## Sheet: DLS_correlation_CaM
1mg/mL free CaM (60uM CaM)
time [µs]	correlation coefficient
	run 1	run 2	run 3
0.5	0.649907	0.645334	0.613447
1	0.624842	0.61428	0.582573
1.5	0.582481	0.572815	0.545608
2	0.550807	0.541548	0.51253
2.5	0.523207	0.509889	0.483896
3	0.494061	0.481016	0.460875
3.5	0.469293	0.454462	0.435756
4	0.443268	0.427376	0.410702
4.5	0.422283	0.407358	0.388551
5.5	0.378772	0.366032	0.348701
6.5	0.34449	0.329716	0.315018
7.5	0.310502	0.294641	0.283775
8.5	0.284935	0.26649	0.258256
9.5	0.256542	0.241664	0.233228
10.5	0.236243	0.219582	0.21034
11.5	0.21677	0.198613	0.193398
12.5	0.199023	0.181933	0.176904
14.5	0.166829	0.151555	0.147669
16.5	0.143634	0.12564	0.12484
18.5	0.125108	0.106916	0.107042
20.5	0.108456	0.0935953	0.0936653
22.5	0.0934605	0.0812723	0.0800868
24.5	0.0825551	0.0709209	0.0702092
26.5	0.0757637	0.0621149	0.0614893
28.5	0.0679844	0.0567724	0.0555487
32.5	0.0558516	0.0448056	0.0444073
36.5	0.0486328	0.0375566	0.0376638
40.5	0.0415706	0.0322163	0.0330734
44.5	0.0373862	0.0280912	0.0280829
48.5	0.0330385	0.024414	0.0257376
52.5	0.0305914	0.0223856	0.0235923
56.5	0.0283879	0.021168	0.0213797
60.5	0.0263353	0.0193529	0.0202036
68.5	0.0240987	0.0171058	0.0169537
76.5	0.0219308	0.0140792	0.0155694
84.5	0.0203633	0.0127405	0.0135764
92.5	0.018597	0.0119395	0.0120997
100.5	0.0168463	0.0116075	0.0111678
108.5	0.0163206	0.0108788	0.0102123
116.5	0.016889	0.00891746	0.00950945
124.5	0.0159563	0.00836149	0.00952723
140.5	0.0130628	0.00801039	0.00807966
156.5	0.0115838	0.00688573	0.00702829
172.5	0.0106937	0.00633248	0.0063972
188.5	0.00938454	0.00544667	0.00559669
204.5	0.00817843	0.00444012	0.00583971
220.5	0.00773669	0.00494067	0.0042197
236.5	0.00720365	0.00389544	0.0035917
252.5	0.0065755	0.0034558	0.00462685
284.5	0.00624831	0.00274943	0.00358479
316.5	0.00532179	0.00271839	0.00305376
348.5	0.00499093	0.00311358	0.00199326
380.5	0.00432518	0.00187738	0.00131415
412.5	0.00347736	0.00151207	0.00117013
444.5	0.00382467	0.00151841	0.000795107
476.5	0.00323571	0.000949396	0.00104205
508.5	0.00258173	0.00141808	0.000902905
572.5	0.00284592	0.0011366	0.00130034
636.5	0.00264364	0.000658719	0.00137849
700.5	0.00223819	0.000922405	0.000746014
764.5	0.00135583	0.00114495	0.000673829
828.5	0.00173852	0.00104833	0.000815608
892.5	0.002137	0.00101531	0.00038823
956.5	0.00162646	0.000721577	0.00114131
1020.5	0.00139744	0.000637914	0.000572852
1148.5	0.00149374	0.00122826	0.000756663
1276.5	0.00143222	0.000609871	0.000642451
1404.5	0.00165144	0.00104022	0.00110845
1532.5	0.0015175	0.000855005	0.000698052
1660.5	0.00164997	0.00086068	0.000451625
1788.5	0.00200303	0.000828237	0.000863408
1916.5	0.00167833	0.000354867	0.000810399
2044.5	0.0014939	0.000525345	0.00079457
2300.5	0.00174154	0.000716416	0.00066279
2556.5	0.00151921	0.000996581	0.000665733
2812.5	0.00122229	0.000568686	0.000600484
3068.5	0.00143877	0.000651062	0.000516037
3324.5	0.00160557	0.000384322	0.00043781
3580.5	0.00135514	0.00098308	0.000553689
3836.5	0.00144396	0.00108985	0.000560684
4092.5	0.00134727	0.00081212	0.000585712
4604.5	0.00120042	0.000746585	0.000472405
5116.5	0.00124269	0.000530974	0.000417466
5628.5	0.00156318	0.000533212	0.000528072
6140.5	0.0012704	0.000736432	0.000540992
6652.5	0.00159473	0.000585314	0.00051129
7164.5	0.00129732	0.000371014	0.000513524
7676.5	0.0012051	0.000296543	0.000465415
8188.5	0.00121364	0.000676975	0.000278452
9212.5	0.00151889	0.000467483	0.000362468
10236.5	0.00128777	0.000705981	0.000462636
11260.5	0.00113079	0.000546725	0.000415143
12284.5	0.0012508	0.000460766	0.000301842
13308.5	0.0013697	0.000628969	0.000453157
14332.5	0.00139711	0.000700847	0.000493961
15356.5	0.00132839	0.000701866	0.000548999
16380.5	0.00134188	0.000616183	0.000552588
18428.5	0.00130755	0.000621861	0.000629473
20476.5	0.0015103	0.000918681	0.000593115
22524.5	0.00144905	0.000709581	0.000621477
24572.5	0.00145341	0.000657548	0.000505942
26620.5	0.00150135	0.000822979	0.000514814
28668.5	0.00132817	0.000728502	0.000376945
30716.5	0.00146481	0.000634842	0.000592949
32764.5	0.00133197	0.000484827	0.000450926
36860.5	0.00128478	0.000562549	0.000581253
40956.5	0.00134343	0.000807003	0.000519075
45052.5	0.00129848	0.000785187	0.000467026
49148.5	0.0013916	0.00036032	0.000520553
53244.5	0.0012077	0.000535406	0.000434396
57340.5	0.00142382	0.000591044	0.000479789
61436.5	0.00139159	0.000774303	0.000500492
65532.5	0.0012969	0.000665046	0.000516536
73724.5	0.00122453	0.000625088	0.000394603
81916.5	0.00135071	0.000702134	0.000519622
90108.5	0.00124462	0.000633526	0.000415704
98300.5	0.00130528	0.000686758	0.000448417
106492	0.00134969	0.000591554	0.000378508
114684	0.00109461	0.000534035	0.000494678
122876	0.00127866	0.00068821	0.000573557
131068	0.00135624	0.000711215	0.000486613
147452	0.00121185	0.000587698	0.000421772
163836	0.00142486	0.000645031	0.000472626
180220	0.00136283	0.000620245	0.000428602
196604	0.00125428	0.000552022	0.000493637
212988	0.00145109	0.000536829	0.000445672
229372	0.00141151	0.000621915	0.000399858
245756	0.00139114	0.000615272	0.000453154
262140	0.00138081	0.000668801	0.000492677
294908	0.00112994	0.000659776	0.000528005
327676	0.00125832	0.000615476	0.00046185
360444	0.00130781	0.000655833	0.000433672
393212	0.00130896	0.00064769	0.000480039
425980	0.0013651	0.000689463	0.000463136
458748	0.00136404	0.000603285	0.000465182
491516	0.0013299	0.000636806	0.000524257
524284	0.0013886	0.000935727	0.000646089
589820	0.0014177	0.000637887	0.000530549
655356	0.00141735	0.000624283	0.000573009
720892	0.0011975	0.000710899	0.000689428
786428	0.00127825	0.000772281	0.000642628
851964	0.00110626	0.000675087	0.000643346
917500	0.00132062	0.000751595	0.000536685
983036	0.00126417	0.000579497	0.000730799
1.04857e+06	0.00104687	0.000948342	0.000812677
1.17964e+06	0.00131562	0.000752428	0.000754707
1.31072e+06	0.000952142	0.000654713	0.000727851
1.44179e+06	0.00107737	0.00087198	0.000544906
1.57286e+06	0.000960515	0.000794837	0.000729006
1.70393e+06	0.000919844	0.000688223	0.00063894
1.835e+06	0.00095169	0.00082375	0.000634659
1.96608e+06	0.000864863	0.000927918	0.000580248
2.09715e+06	0.00130587	0.000531824	0.000617497
2.35929e+06	0.00136953	0.000518567	0.000889711
2.62144e+06	0.00117947	0.000504327	0.000553374
2.88358e+06	0.00094379	0.000546208	0.00049228
3.14572e+06	0.000720325	0.00052929	0.000391171
3.40787e+06	0.000812789	0.000442768	0.000316636
3.67001e+06	0.000954923	0.000691514	0.000248044
3.93216e+06	0.00093191	0.000514468	0.000454365
4.1943e+06	0	0	0
4.71859e+06	0	0	0
5.24288e+06	0	0	0
5.76716e+06	0	0	0
6.29145e+06	0	0	0
6.81574e+06	0	0	0
7.34003e+06	0	0	0
7.86432e+06	0	0	0
8.3886e+06	0	0	0
9437180	0	0	0
10485756	0	0	0
11534332	0	0	0
12582908	0	0	0
13631484	0	0	0
14680060	0	0	0
15728636	0	0	0
16777212	0	0	0
18874364	0	0	0
20971516	0	0	0
23068668	0	0	0
25165820	0	0	0
27262972	0	0	0
29360124	0	0	0
31457276	0	0	0
33554428	0	0	0
37748732	0	0	0
41943036	0	0	0
46137340	0	0	0
50331644	0	0	0
54525948	0	0	0
58720252	0	0	0

## Sheet: DLS_correlation_1to1
1mg/mL 1:1 complex (40uM CaM + 40 uM H1H2)
time [µs]	correlation coefficient
	run 1	run 2	run 3
0.5	0.701863	0.69947	0.703437
1	0.677555	0.6737	0.682051
1.5	0.647004	0.643252	0.650399
2	0.615853	0.612098	0.622313
2.5	0.588365	0.586137	0.59516
3	0.565727	0.56043	0.569786
3.5	0.538959	0.539129	0.545462
4	0.516357	0.511351	0.523079
4.5	0.494773	0.491937	0.503553
5.5	0.45107	0.450461	0.461592
6.5	0.416241	0.413851	0.424863
7.5	0.382961	0.38378	0.393815
8.5	0.353226	0.350354	0.362846
9.5	0.326554	0.324233	0.336012
10.5	0.301112	0.298416	0.309696
11.5	0.279649	0.278751	0.288924
12.5	0.259996	0.257461	0.269217
14.5	0.223974	0.220945	0.233846
16.5	0.193582	0.193054	0.204669
18.5	0.169599	0.168026	0.179578
20.5	0.151131	0.146836	0.158853
22.5	0.132202	0.128856	0.140902
24.5	0.118558	0.114095	0.12427
26.5	0.104458	0.101603	0.112375
28.5	0.0936853	0.0918696	0.101919
32.5	0.0764847	0.0751621	0.0841141
36.5	0.0636551	0.062222	0.0718132
40.5	0.0549122	0.0537911	0.061421
44.5	0.0471214	0.0476586	0.0538419
48.5	0.0417707	0.0414713	0.0475608
52.5	0.037759	0.037306	0.0426974
56.5	0.0344379	0.033696	0.0402244
60.5	0.0318657	0.0308002	0.0378059
68.5	0.0277181	0.0272574	0.0319289
76.5	0.0256407	0.0242825	0.0286935
84.5	0.0230701	0.0225783	0.0263538
92.5	0.0211662	0.0213999	0.0251112
100.5	0.0201451	0.0197351	0.0238691
108.5	0.019657	0.0192827	0.022225
116.5	0.0183167	0.0185937	0.0210281
124.5	0.0180285	0.018114	0.020788
140.5	0.016488	0.016672	0.0193277
156.5	0.015091	0.014836	0.0176585
172.5	0.0138059	0.0132913	0.0160152
188.5	0.0132009	0.0116349	0.0153703
204.5	0.0125895	0.010941	0.0148279
220.5	0.012092	0.010544	0.0134742
236.5	0.0111719	0.00986915	0.0125036
252.5	0.0106651	0.00920811	0.0116173
284.5	0.0095534	0.00843497	0.00954337
316.5	0.00881816	0.00765015	0.008908
348.5	0.00773683	0.00710096	0.00797887
380.5	0.00665075	0.00564069	0.00710414
412.5	0.00566163	0.00588222	0.00761373
444.5	0.00503682	0.00486436	0.00677485
476.5	0.00431036	0.00419968	0.00569893
508.5	0.00454091	0.00364004	0.00477688
572.5	0.00379442	0.00310428	0.00386571
636.5	0.00378841	0.00274467	0.00326432
700.5	0.00313774	0.0028452	0.00283891
764.5	0.00281447	0.00236591	0.00205533
828.5	0.00201059	0.00181773	0.00183709
892.5	0.0019621	0.00163945	0.00177002
956.5	0.00126278	0.00149843	0.00107827
1020.5	0.00135458	0.00119562	0.0010202
1148.5	0.000967798	0.000748144	0.000711408
1276.5	0.00109311	0.000624506	0.000384484
1404.5	0.000843062	0.000594063	0.000898073
1532.5	0.000511528	0.000513555	0.000295778
1660.5	0.000759629	0.000358723	0.000280896
1788.5	0.00112841	0.000409589	0.000532898
1916.5	0.00100106	0.000713027	0.000531408
2044.5	0.000999169	0.000331255	0.000225089
2300.5	0.000932826	0.000152996	0.000229334
2556.5	0.00110297	0.000369823	0.000317856
2812.5	0.000625511	4.27643e-05	6.10553e-05
3068.5	0.00118302	9.24517e-05	0.000175269
3324.5	0.000932319	0.000138077	0.000180704
3580.5	0.000868126	0.000186645	0.000258059
3836.5	0.000626597	8.30438e-05	0.000705789
4092.5	0.000643204	0.000145806	0.00049762
4604.5	0.000890171	0.000209693	0
5116.5	0.000838096	0.000223332	0
5628.5	0.000614742	5.12816e-06	1.71423e-05
6140.5	0.000599378	6.22963e-05	0.00028274
6652.5	0.000643793	0.000397835	0.000342772
7164.5	0.00110138	0.000168514	0.000206776
7676.5	0.000990081	0.00052229	0.00016077
8188.5	0.000692635	0.00023595	7.56419e-05
9212.5	0.000639695	0.000295511	0.000183532
10236.5	0.000851756	0.000208936	0.000222558
11260.5	0.000529778	0.000117213	5.43332e-05
12284.5	0.000631068	0.000175718	0.00033607
13308.5	0.00069835	3.31373e-05	3.2273e-05
14332.5	0.000860886	9.95448e-05	0.000120629
15356.5	0.000945767	0.000165469	0.00012465
16380.5	0.00067769	0.000123796	0.000109189
18428.5	0.000650996	0.000134363	0.000145585
20476.5	0.000680267	0.000154447	0.000147494
22524.5	0.000745767	0.000100181	0.000255216
24572.5	0.000822663	0.000142935	0.000157242
26620.5	0.00081177	0.000219903	8.45058e-05
28668.5	0.000791648	0.000194329	3.84788e-05
30716.5	0.000793879	6.83121e-05	9.02735e-05
32764.5	0.000602153	0.000161187	5.88672e-05
36860.5	0.00065192	0.000223	7.08135e-05
40956.5	0.000658202	0.000193851	8.14596e-05
45052.5	0.000656423	6.43306e-05	0.00024763
49148.5	0.000587753	0.000136343	8.78862e-05
53244.5	0.000650215	0.000124265	2.80711e-05
57340.5	0.000709385	7.64284e-05	0.00013649
61436.5	0.000572208	0.000132566	0.000130699
65532.5	0.000616818	8.22442e-05	0.000107685
73724.5	0.000759902	0.000116996	0.000124564
81916.5	0.000709569	0.00015366	9.59238e-05
90108.5	0.000716944	3.03529e-05	0.000177413
98300.5	0.00067717	6.41548e-05	9.44833e-05
106492	0.000684067	2.33889e-05	0.000208166
114684	0.000623674	7.29442e-05	0.000166282
122876	0.000792103	7.13803e-05	0.000109642
131068	0.000677838	0.000133203	2.55658e-05
147452	0.00068991	0.000122709	0.000108843
163836	0.00066248	4.86319e-05	3.15759e-05
180220	0.000623153	4.0037e-05	5.63178e-05
196604	0.000581001	0.000154651	6.3756e-06
212988	0.000562084	0.000168048	7.07638e-05
229372	0.000509825	0.000220992	5.52572e-05
245756	0.000551506	0.000145491	1.08609e-06
262140	0.000563894	4.30525e-05	0.000155041
294908	0.000551485	0.000121517	0.000119295
327676	0.000605473	0.000121995	4.27075e-05
360444	0.000461363	9.8546e-05	0.000192352
393212	0.00057824	8.18358e-05	0.000150793
425980	0.000413024	5.85653e-05	9.85398e-05
458748	0.000530007	0.000150083	0.000149997
491516	0.000425491	5.7426e-05	9.5509e-05
524284	0.000533876	0.000153147	0.000154708
589820	0.000374436	5.45833e-05	0.000121839
655356	0.000342805	3.2122e-05	0.000115742
720892	0.000512477	6.44861e-05	9.03184e-05
786428	0.000277484	7.3626e-05	0.000103114
851964	0.000442321	2.53406e-05	0.000120726
917500	0.000402308	0	9.55853e-05
983036	0.000353307	6.70724e-05	0.000226364
1.04857e+06	0.000514913	8.23974e-05	4.54437e-05
1.17964e+06	0.00082256	0.000186308	0
1.31072e+06	0.000698417	0.000440169	0
1.44179e+06	0.000385547	0.000112857	3.039e-05
1.57286e+06	0.000760469	0.000339444	0
1.70393e+06	0.000706328	0.000304985	2.42569e-05
1.835e+06	0.000504261	0.000174786	0
1.96608e+06	0.00057045	0.000231294	0
2.09715e+06	0.00130938	0.000139442	0.000272199
2.35929e+06	0.00119088	0.000491307	0.000197376
2.62144e+06	0.000959464	0.00011398	0.00022573
2.88358e+06	0.00161712	0.000233044	0.00014286
3.14572e+06	0.00150933	9.57972e-05	6.48862e-05
3.40787e+06	0.00139901	7.26854e-05	0.000274111
3.67001e+06	0.00129188	6.3087e-05	0.00019678
3.93216e+06	0.00130916	0.000146776	0.000270978
4.1943e+06	0	0	0
4.71859e+06	0	0	0
5.24288e+06	0	0	0
5.76716e+06	0	0	0
6.29145e+06	0	0	0
6.81574e+06	0	0	0
7.34003e+06	0	0	0
7.86432e+06	0	0	0
8.3886e+06	0	0	0
9437180	0	0	0
10485756	0	0	0
11534332	0	0	0
12582908	0	0	0
13631484	0	0	0
14680060	0	0	0
15728636	0	0	0
16777212	0	0	0
18874364	0	0	0
20971516	0	0	0
23068668	0	0	0
25165820	0	0	0
27262972	0	0	0
29360124	0	0	0
31457276	0	0	0
33554428	0	0	0
37748732	0	0	0
41943036	0	0	0
46137340	0	0	0
50331644	0	0	0
54525948	0	0	0
58720252	0	0	0

## Sheet: DLS_correlation_1to2
1mg/mL 1:2 complex (30uM CaM + 60 uM H1H2)
time [µs]	correlation coefficient
	run 1	run 2	run 3
0.5	0.776103	0.779977	0.781875
1	0.763098	0.766536	0.765395
1.5	0.737898	0.742465	0.740986
2	0.716561	0.718416	0.717558
2.5	0.694304	0.699149	0.6943
3	0.673363	0.679001	0.672045
3.5	0.654442	0.660232	0.653258
4	0.634994	0.64088	0.632625
4.5	0.617423	0.621643	0.613293
5.5	0.584072	0.589597	0.577462
6.5	0.552869	0.558506	0.544655
7.5	0.523778	0.530302	0.514999
8.5	0.4971	0.502926	0.487624
9.5	0.47217	0.479373	0.460424
10.5	0.449885	0.454585	0.437426
11.5	0.428328	0.433576	0.41578
12.5	0.408271	0.414539	0.394528
14.5	0.372971	0.378512	0.357136
16.5	0.341335	0.346776	0.324929
18.5	0.314255	0.32	0.296061
20.5	0.290686	0.296062	0.271296
22.5	0.269682	0.274833	0.250586
24.5	0.250959	0.256687	0.231618
26.5	0.235187	0.240544	0.215331
28.5	0.221519	0.226903	0.201341
32.5	0.197145	0.202743	0.177053
36.5	0.178019	0.183724	0.158934
40.5	0.163207	0.169184	0.143274
44.5	0.150366	0.155677	0.131086
48.5	0.140369	0.146137	0.121842
52.5	0.131264	0.137381	0.113664
56.5	0.124355	0.130244	0.107019
60.5	0.118916	0.124583	0.102049
68.5	0.109667	0.114762	0.0935691
76.5	0.103198	0.108173	0.0864334
84.5	0.0978839	0.102982	0.0811796
92.5	0.0928897	0.09859	0.0772073
100.5	0.08887	0.0945597	0.0741639
108.5	0.0853774	0.0911968	0.0716078
116.5	0.0820335	0.0880366	0.0689501
124.5	0.0797114	0.0853826	0.0671327
140.5	0.0751109	0.0814991	0.0633394
156.5	0.071978	0.0778937	0.0590781
172.5	0.0680948	0.0740793	0.0552943
188.5	0.0645955	0.0704272	0.0532166
204.5	0.0610522	0.0667139	0.050253
220.5	0.0583604	0.0634008	0.0477675
236.5	0.0555303	0.0605212	0.0449707
252.5	0.0527292	0.0582738	0.0427911
284.5	0.0477444	0.053514	0.0390629
316.5	0.0438805	0.0488694	0.035682
348.5	0.0399665	0.0440528	0.0319696
380.5	0.0371633	0.0396329	0.0289068
412.5	0.0333159	0.0366368	0.02644
444.5	0.0305727	0.034063	0.0241865
476.5	0.0273902	0.0314489	0.0225253
508.5	0.0245637	0.0291672	0.0208273
572.5	0.0212913	0.0248988	0.0169388
636.5	0.0177589	0.0213837	0.0139497
700.5	0.0160181	0.0184566	0.0117736
764.5	0.0142105	0.0162351	0.0101565
828.5	0.0125653	0.0146601	0.00777292
892.5	0.0116634	0.0129088	0.00635557
956.5	0.00947915	0.011344	0.00545643
1020.5	0.00805488	0.0101058	0.00481654
1148.5	0.00520363	0.00853745	0.00330144
1276.5	0.00422539	0.00740187	0.00237923
1404.5	0.00343935	0.00644105	0.0015875
1532.5	0.00328563	0.00612335	0.000912034
1660.5	0.00249493	0.00523601	0.00135041
1788.5	0.00197476	0.004957	0.000631382
1916.5	0.00106377	0.00410608	0.0008187
2044.5	0.00116457	0.00395674	0.000741495
2300.5	0.00156377	0.00339797	0.000512698
2556.5	0.00168842	0.00246784	0.000586057
2812.5	0.00162149	0.00301604	0.00108955
3068.5	0.00169448	0.00281225	0.000957836
3324.5	0.00158738	0.00278805	0.000747365
3580.5	0.00128825	0.00288574	0.000762213
3836.5	0.00122146	0.00268921	0.000604408
4092.5	0.00170816	0.00223837	0.000492176
4604.5	0.00149972	0.00210929	0.000814129
5116.5	0.00146042	0.00150167	0.000689465
5628.5	0.00110507	0.00164016	0.000982476
6140.5	0.00120048	0.0020324	0.00111367
6652.5	0.000950207	0.00210163	0.000396193
7164.5	0.00139472	0.00239762	0.000131129
7676.5	0.000769474	0.00236723	0.000623918
8188.5	0.000498401	0.00240837	0.000330087
9212.5	0.000446592	0.00146837	0.000105566
10236.5	0.00105112	0.0018042	0.000682427
11260.5	0.000374566	0.0014946	0.000472407
12284.5	0.000430418	0.00174402	0.00012756
13308.5	0.000185222	0.00149107	0.000319304
14332.5	0.000393872	0.00129498	0.000857776
15356.5	0.000981041	0.00167272	0.000410738
16380.5	0.000918308	0.00157882	0.000497619
18428.5	0.000392381	0.00150201	0.000436631
20476.5	0.000746677	0.000987407	0.000364176
22524.5	0.000523357	0.00127229	0.000195541
24572.5	0.00142129	0.00099699	0.00018798
26620.5	0.000909354	0.000832967	0.000454197
28668.5	0.000683846	0.00101222	0.00049192
30716.5	0.000617836	0.00116865	0.000392617
32764.5	0.00033261	0.00109808	0.000256061
36860.5	0.000611045	0.000856624	0.000370198
40956.5	0.000199861	0.000844506	0.000277764
45052.5	0.000872769	0.000687212	0
49148.5	0.000669002	0.000495739	0.000400738
53244.5	0.000632533	0.000911213	0.00026076
57340.5	0.000349259	0.000844308	0.00019549
61436.5	0.00040186	0.000732849	0.000870646
65532.5	0.00055885	0.000837209	0.000470404
73724.5	0.000351485	0.000594385	0.0001717
81916.5	0.000389499	0.000809342	0.000213168
90108.5	0.000609534	0.000602617	0.000124277
98300.5	0.000422081	0.00139854	0.000222523
106492	0.000320975	0.000560777	0.00011903
114684	0.000482035	0.000673525	0.000397131
122876	0.000219051	0.000714347	0.000190726
131068	0.000512607	0.000512083	0.00013901
147452	0.000302529	0.000495121	3.55818e-05
163836	0.000143149	0.00050253	0.000149954
180220	0.000288578	0.000451013	0.000117657
196604	0.000111817	0.000688734	8.59011e-05
212988	0.000518314	0.00066387	0.000146637
229372	0.000274532	0.000550585	8.99343e-05
245756	0.000237867	0.000716131	0.000189022
262140	0.000380965	0.000575558	0.000226307
294908	0.000650915	0.000714484	0.000254886
327676	0.000689539	0.000632269	0.000204619
360444	0.000588339	0.000587543	0.000174987
393212	0.000806635	0.000759266	0.000185287
425980	0.000471674	0.000646447	0.000136111
458748	0.000302583	0.000679444	0.000137646
491516	0.000524389	0.000689173	0.000228373
524284	0.000692579	0.000219625	0.000139518
589820	0.000626808	0.000478221	0.00041185
655356	0.000638695	0.000566399	5.39925e-05
720892	0.000937441	0.000217102	0
786428	0.00080453	0.000559393	4.55752e-06
851964	0.000371674	0.0004953	2.61698e-05
917500	0.000588971	0.000297649	0.000100567
983036	0.000715701	0.00043385	0.000104385
1.04857e+06	0.000409985	0.000851644	0.000153346
1.17964e+06	0.000431953	0.000432177	0.000224216
1.31072e+06	0.000470819	0.0004376	0.000125098
1.44179e+06	0.00018743	0.00017035	0.000399073
1.57286e+06	0.000289996	0.000698238	0.000301437
1.70393e+06	0.000216719	0.000547599	0.000263038
1.835e+06	0.000680646	0.00072052	0.000163298
1.96608e+06	0.000736358	0.000543597	0.000380121
2.09715e+06	0.000760091	0.000501766	2.51934e-05
2.35929e+06	0.000340483	0.000451184	0.000146432
2.62144e+06	5.13001e-05	0.000450682	0.000200285
2.88358e+06	0.000333558	0.000666159	0.000127549
3.14572e+06	0.000159098	0.000213387	0.000234694
3.40787e+06	0.000259086	0.000650132	0
3.67001e+06	0.000192874	0.000730858	9.53538e-05
3.93216e+06	0.000250689	0.000398612	0.000176776
4.1943e+06	0	0	0
4.71859e+06	0	0	0
5.24288e+06	0	0	0
5.76716e+06	0	0	0
6.29145e+06	0	0	0
6.81574e+06	0	0	0
7.34003e+06	0	0	0
7.86432e+06	0	0	0
8.3886e+06	0	0	0
9437180	0	0	0
10485756	0	0	0
11534332	0	0	0
12582908	0	0	0
13631484	0	0	0
14680060	0	0	0
15728636	0	0	0
16777212	0	0	0
18874364	0	0	0
20971516	0	0	0
23068668	0	0	0
25165820	0	0	0
27262972	0	0	0
29360124	0	0	0
31457276	0	0	0
33554428	0	0	0
37748732	0	0	0
41943036	0	0	0
46137340	0	0	0
50331644	0	0	0
54525948	0	0	0
58720252	0	0	0
