# Supplementary material for: Dynamic Na+/H+ exchanger 1 (NHE1) – calmodulin complexes of varying stoichiometry and structure regulate Ca2+-dependent NHE1 activation
Source: eLife. 2021 Mar 3;10:e60889. doi: 10.7554/eLife.60889 (PMC8009664; doi:10.7554/eLife.60889)
Supplement: Figure 3—source data 3. [file elife-60889-fig3-data3.xlsx]

## Sheet: Sheet1
free CaM					CaM + H1H2 (1to1)
V [mL]	A280	V [mL]	MW(MALS) [kDa]		V [mL]	A280	V [mL]	MW(MALS) [kDa]
-1.89311	-0.00285	9.99025	16384.9		-1.89289	-0.000129359	9.49659	25909.6
-1.88635	-0.06019	10.0069	16624.8		-1.89008	-0.06377	9.5132	26076.5
-1.87959	-0.06434	10.0235	16682.3		-1.88727	-0.02408	9.52981	26189.1
-1.87283	-0.06504	10.0401	16784.5		-1.88446	0.000413783	9.54641	26289.1
-1.86606	-0.07693	10.0567	16865.9		-1.88165	0.000417073	9.56302	26371.1
-1.8593	0.03623	10.0733	16893.7		-1.87884	0.000437494	9.57963	26430.3
-1.85254	0.53358	10.0899	16857.6		-1.87603	0.000412427	9.59623	26461.8
-1.84577	0.84232	10.1065	16780.4		-1.87323	0.000385111	9.61284	26464.4
-1.83901	0.8456	10.1231	16705.5		-1.87042	-0.00059849	9.62945	26444.9
-1.83225	0.78949	10.1397	16674.4		-1.86761	-0.0029	9.64605	26413.6
-1.82548	0.72662	10.1563	16687.1		-1.8648	-0.00499	9.66266	26373.4
-1.81872	0.67108	10.1729	16727.5		-1.86199	-0.00484	9.67927	26320.1
-1.81196	0.61941	10.1895	16791.9		-1.85918	0.00371	9.69588	26254
-1.8052	0.56128	10.2061	16858.8		-1.85637	0.02821	9.71248	26179.2
-1.79843	0.50107	10.2227	16922		-1.85356	0.06904	9.72909	26097.1
-1.79167	0.45254	10.2394	16988.5		-1.85075	0.10919	9.7457	26008.5
-1.78491	0.40177	10.256	17052.2		-1.84794	0.13566	9.7623	25918.3
-1.77814	0.35485	10.2726	17191.4		-1.84513	0.148	9.77891	25831.9
-1.77138	0.31719	10.2892	17261.8		-1.84232	0.15484	9.79552	25752.3
-1.76462	0.28461	10.3058	17254.6		-1.83951	0.15903	9.81213	25679.9
-1.75786	0.26072	10.3224	17282.4		-1.8367	0.15917	9.82873	25615
-1.75109	0.24134	10.339	17306.4		-1.8339	0.15664	9.84534	25555.8
-1.74433	0.22653	10.3556	17312.4		-1.83109	0.15297	9.86195	25496.2
-1.73757	0.21405	10.3722	17297.1		-1.82828	0.14891	9.87855	25428
-1.7308	0.20379	10.3888	17271.2		-1.82547	0.14504	9.89516	25347
-1.72404	0.19556	10.4054	17253.7		-1.82266	0.14157
-1.71728	0.18631	10.422	17239.8		-1.81985	0.13908
-1.71051	0.17725	10.4386	17212.4		-1.81704	0.13629
-1.70375	0.17021	10.4552	17167.6		-1.81423	0.13291
-1.69699	0.16322	10.4719	17107.4		-1.81142	0.12912
-1.69023	0.15533	10.4885	17031.6		-1.80861	0.12536
-1.68346	0.14868	10.5051	16954.9		-1.8058	0.12146
-1.6767	0.14288	10.5217	16907.7		-1.80299	0.11706
-1.66994	0.13794	10.5383	16912.7		-1.80018	0.11211
-1.66317	0.13366	10.5549	16961		-1.79737	0.10688
-1.65641	0.12512	10.5715	17022.2		-1.79457	0.10202
-1.64965	0.11896	10.5881	17059.8		-1.79176	0.09702
-1.64288	0.11645	10.6047	17049.5		-1.78895	0.0923
-1.63612	0.1161	10.6213	16997.2		-1.78614	0.08781
-1.62936	0.11418				-1.78333	0.08407
-1.6226	0.11289				-1.78052	0.08057
-1.61583	0.11414				-1.77771	0.07703
-1.60907	0.12591				-1.7749	0.07366
-1.60231	0.14093				-1.77209	0.07078
-1.59554	0.14525				-1.76928	0.06833
-1.58878	0.14389				-1.76647	0.06608
-1.58202	0.13753				-1.76366	0.0638
-1.57526	0.13196				-1.76085	0.06176
-1.56849	0.12498				-1.75804	0.06016
-1.56173	0.11566				-1.75524	0.0587
-1.55497	0.10816				-1.75243	0.05708
-1.5482	0.10139				-1.74962	0.05551
-1.54144	0.09563				-1.74681	0.05391
-1.53468	0.08935				-1.744	0.05259
-1.52791	0.08283				-1.74119	0.05127
-1.52115	0.0768				-1.73838	0.05047
-1.51439	0.07127				-1.73557	0.04983
-1.50763	0.06626				-1.73276	0.04907
-1.50086	0.06281				-1.72995	0.04814
-1.4941	0.05941				-1.72714	0.04734
-1.48734	0.05587				-1.72433	0.04692
-1.48057	0.05269				-1.72152	0.04645
-1.47381	0.04956				-1.71871	0.04602
-1.46705	0.04611				-1.71591	0.04534
-1.46028	0.04289				-1.7131	0.04463
-1.45352	0.03982				-1.71029	0.04387
-1.44676	0.03682				-1.70748	0.04331
-1.44	0.03427				-1.70467	0.04295
-1.43323	0.03225				-1.70186	0.04247
-1.42647	0.03034				-1.69905	0.04196
-1.41971	0.02878				-1.69624	0.0414
-1.41294	0.02805				-1.69343	0.0409
-1.40618	0.02731				-1.69062	0.04028
-1.39942	0.02687				-1.68781	0.03962
-1.39266	0.02642				-1.685	0.03918
-1.38589	0.02769				-1.68219	0.03885
-1.37913	0.02991				-1.67938	0.03882
-1.37237	0.03363				-1.67658	0.03837
-1.3656	0.04139				-1.67377	0.03769
-1.35884	0.04916				-1.67096	0.03671
-1.35208	0.05038				-1.66815	0.03604
-1.34531	0.05094				-1.66534	0.03576
-1.33855	0.0492				-1.66253	0.03555
-1.33179	0.04553				-1.65972	0.03513
-1.32503	0.04174				-1.65691	0.03447
-1.31826	0.03735				-1.6541	0.03397
-1.3115	0.03296				-1.65129	0.03363
-1.30474	0.0293				-1.64848	0.03353
-1.29797	0.0258				-1.64567	0.03353
-1.29121	0.02258				-1.64286	0.03343
-1.28445	0.01968				-1.64005	0.03322
-1.27769	0.01679				-1.63725	0.03297
-1.27092	0.01388				-1.63444	0.03281
-1.26416	0.01098				-1.63163	0.03255
-1.2574	0.00921				-1.62882	0.03209
-1.25063	0.00791				-1.62601	0.03168
-1.24387	0.00627				-1.6232	0.03132
-1.23711	0.00401				-1.62039	0.03091
-1.23034	0.00175				-1.61758	0.03074
-1.22358	0.000104971				-1.61477	0.03114
-1.21682	-0.00154				-1.61196	0.03215
-1.21006	-0.00328				-1.60915	0.03346
-1.20329	-0.00509				-1.60634	0.03501
-1.19653	-0.00668				-1.60353	0.03664
-1.18977	-0.00766				-1.60072	0.03795
-1.183	-0.00863				-1.59792	0.0386
-1.17624	-0.00933				-1.59511	0.03878
-1.16948	-0.01				-1.5923	0.03863
-1.16271	-0.01095				-1.58949	0.03829
-1.15595	-0.01214				-1.58668	0.03789
-1.14919	-0.01336				-1.58387	0.03754
-1.14243	-0.01474				-1.58106	0.0372
-1.13566	-0.01611				-1.57825	0.03675
-1.1289	-0.01719				-1.57544	0.03629
-1.12214	-0.01819				-1.57263	0.03568
-1.11537	-0.01914				-1.56982	0.03498
-1.10861	-0.02004				-1.56701	0.03424
-1.10185	-0.02089				-1.5642	0.03339
-1.09509	-0.02107				-1.56139	0.03256
-1.08832	-0.02124				-1.55858	0.03178
-1.08156	-0.02156				-1.55578	0.03111
-1.0748	-0.02194				-1.55297	0.03045
-1.06803	-0.02242				-1.55016	0.02977
-1.06127	-0.02309				-1.54735	0.02922
-1.05451	-0.02376				-1.54454	0.02872
-1.04774	-0.02469				-1.54173	0.02812
-1.04098	-0.02564				-1.53892	0.02756
-1.03422	-0.02629				-1.53611	0.02709
-1.02746	-0.02674				-1.5333	0.02665
-1.02069	-0.02718				-1.53049	0.02625
-1.01393	-0.02757				-1.52768	0.02585
-1.00717	-0.02795				-1.52487	0.02551
-1.0004	-0.02855				-1.52206	0.02514
-0.99364	-0.02917				-1.51925	0.02473
-0.98688	-0.02957				-1.51645	0.02432
-0.98011	-0.02974				-1.51364	0.02394
-0.97335	-0.03002				-1.51083	0.02364
-0.96659	-0.031				-1.50802	0.0233
-0.95983	-0.03198				-1.50521	0.02288
-0.95306	-0.03216				-1.5024	0.02245
-0.9463	-0.03212				-1.49959	0.02207
-0.93954	-0.03207				-1.49678	0.02162
-0.93277	-0.03178				-1.49397	0.02112
-0.92601	-0.03148				-1.49116	0.02071
-0.91925	-0.03119				-1.48835	0.02037
-0.91249	-0.03048				-1.48554	0.02006
-0.90572	-0.02973				-1.48273	0.01976
-0.89896	-0.02898				-1.47992	0.01962
-0.8922	-0.0259				-1.47712	0.01942
-0.88543	-0.02193				-1.47431	0.01928
-0.87867	-0.01797				-1.4715	0.01911
-0.87191	-0.0151				-1.46869	0.01896
-0.86514	-0.01302				-1.46588	0.01881
-0.85838	-0.01095				-1.46307	0.01858
-0.85162	-0.00994				-1.46026	0.0184
-0.84486	-0.01028				-1.45745	0.01816
-0.83809	-0.01061				-1.45464	0.01796
-0.83133	-0.01126				-1.45183	0.0178
-0.82457	-0.01275				-1.44902	0.01764
-0.8178	-0.01425				-1.44621	0.01744
-0.81104	-0.01575				-1.4434	0.01726
-0.80428	-0.01738				-1.44059	0.01709
-0.79752	-0.019				-1.43779	0.01692
-0.79075	-0.02062				-1.43498	0.01664
-0.78399	-0.02184				-1.43217	0.01636
-0.77723	-0.02304				-1.42936	0.01623
-0.77046	-0.02424				-1.42655	0.01603
-0.7637	-0.02505				-1.42374	0.01579
-0.75694	-0.02576				-1.42093	0.01565
-0.75017	-0.02647				-1.41812	0.01559
-0.74341	-0.02713				-1.41531	0.01554
-0.73665	-0.02777				-1.4125	0.01542
-0.72989	-0.02841				-1.40969	0.01528
-0.72312	-0.02888				-1.40688	0.01519
-0.71636	-0.02917				-1.40407	0.01513
-0.7096	-0.02946				-1.40126	0.01508
-0.70283	-0.02973				-1.39846	0.01506
-0.69607	-0.02999				-1.39565	0.01502
-0.68931	-0.03025				-1.39284	0.01498
-0.68254	-0.03055				-1.39003	0.01491
-0.67578	-0.03104				-1.38722	0.01485
-0.66902	-0.03152				-1.38441	0.01478
-0.66226	-0.03201				-1.3816	0.01481
-0.65549	-0.03238				-1.37879	0.01496
-0.64873	-0.03276				-1.37598	0.01539
-0.64197	-0.03313				-1.37317	0.01594
-0.6352	-0.03362				-1.37036	0.01651
-0.62844	-0.03413				-1.36755	0.01708
-0.62168	-0.03463				-1.36474	0.01767
-0.61492	-0.03495				-1.36193	0.0183
-0.60815	-0.0352				-1.35913	0.01893
-0.60139	-0.03545				-1.35632	0.01938
-0.59463	-0.0357				-1.35351	0.01973
-0.58786	-0.03594				-1.3507	0.01974
-0.5811	-0.03618				-1.34789	0.01966
-0.57434	-0.03637				-1.34508	0.01953
-0.56757	-0.0365				-1.34227	0.01934
-0.56081	-0.03662				-1.33946	0.01916
-0.55405	-0.03682				-1.33665	0.01896
-0.54729	-0.03723				-1.33384	0.01871
-0.54052	-0.03763				-1.33103	0.01849
-0.53376	-0.03801				-1.32822	0.01819
-0.527	-0.03819				-1.32541	0.01787
-0.52023	-0.03836				-1.3226	0.01756
-0.51347	-0.03854				-1.3198	0.01724
-0.50671	-0.0385				-1.31699	0.01699
-0.49994	-0.03845				-1.31418	0.01669
-0.49318	-0.03841				-1.31137	0.01638
-0.48642	-0.03869				-1.30856	0.01613
-0.47966	-0.03905				-1.30575	0.01591
-0.47289	-0.03941				-1.30294	0.01569
-0.46613	-0.03968				-1.30013	0.01544
-0.45937	-0.03975				-1.29732	0.01517
-0.4526	-0.03982				-1.29451	0.01491
-0.44584	-0.03988				-1.2917	0.01467
-0.43908	-0.03949				-1.28889	0.01446
-0.43232	-0.03833				-1.28608	0.01426
-0.42555	-0.03717				-1.28327	0.01403
-0.41879	-0.03601				-1.28047	0.01377
-0.41203	-0.03419				-1.27766	0.01347
-0.40526	-0.03144				-1.27485	0.01322
-0.3985	-0.02869				-1.27204	0.01302
-0.39174	-0.02595				-1.26923	0.01283
-0.38497	-0.0241				-1.26642	0.01264
-0.37821	-0.0232				-1.26361	0.01245
-0.37145	-0.0223				-1.2608	0.01225
-0.36469	-0.02139				-1.25799	0.01204
-0.35792	-0.02143				-1.25518	0.01189
-0.35116	-0.02231				-1.25237	0.01181
-0.3444	-0.02318				-1.24956	0.01169
-0.33763	-0.02406				-1.24675	0.01156
-0.33087	-0.02494				-1.24394	0.01143
-0.32411	-0.02581				-1.24114	0.01131
-0.31735	-0.02669				-1.23833	0.01119
-0.31058	-0.02757				-1.23552	0.0111
-0.30382	-0.02825				-1.23271	0.01103
-0.29706	-0.02881				-1.2299	0.01089
-0.29029	-0.02937				-1.22709	0.01078
-0.28353	-0.02993				-1.22428	0.0107
-0.27677	-0.0304				-1.22147	0.01058
-0.27	-0.03084				-1.21866	0.01043
-0.26324	-0.03128				-1.21585	0.01026
-0.25648	-0.03172				-1.21304	0.01011
-0.24972	-0.03221				-1.21023	0.00999
-0.24295	-0.03272				-1.20742	0.00988
-0.23619	-0.03323				-1.20461	0.00981
-0.22943	-0.03374				-1.20181	0.00968
-0.22266	-0.03426				-1.199	0.00951
-0.2159	-0.0348				-1.19619	0.00937
-0.20914	-0.03533				-1.19338	0.00927
-0.20237	-0.03586				-1.19057	0.00922
-0.19561	-0.03614				-1.18776	0.00917
-0.18885	-0.03637				-1.18495	0.00908
-0.18209	-0.03661				-1.18214	0.00897
-0.17532	-0.03685				-1.17933	0.00889
-0.16856	-0.037				-1.17652	0.00882
-0.1618	-0.03715				-1.17371	0.00878
-0.15503	-0.0373				-1.1709	0.00872
-0.14827	-0.03745				-1.16809	0.00864
-0.14151	-0.03773				-1.16528	0.00852
-0.13475	-0.038				-1.16248	0.00838
-0.12798	-0.03828				-1.15967	0.00831
-0.12122	-0.03856				-1.15686	0.00824
-0.11446	-0.03892				-1.15405	0.00815
-0.10769	-0.03928				-1.15124	0.00808
-0.10093	-0.03964				-1.14843	0.008
-0.09417	-0.03998				-1.14562	0.00792
-0.0874	-0.04016				-1.14281	0.00786
-0.08064	-0.04034				-1.14	0.00781
-0.07388	-0.04052				-1.13719	0.00778
-0.06712	-0.04067				-1.13438	0.00771
-0.06035	-0.04065				-1.13157	0.00763
-0.05359	-0.04062				-1.12876	0.00755
-0.04683	-0.0406				-1.12595	0.00746
-0.04006	-0.04064				-1.12315	0.00743
-0.0333	-0.04092				-1.12034	0.0074
-0.02654	-0.04121				-1.11753	0.00732
-0.01977	-0.04149				-1.11472	0.00722
-0.01301	-0.03632				-1.11191	0.0071
-0.00625	-0.01757				-1.1091	0.00702
0.000515	-0.000284791				-1.10629	0.00697
0.00728	-0.000852511				-1.10348	0.00693
0.01404	-0.00142				-1.10067	0.00686
0.0208	0.00102				-1.09786	0.00673
0.02757	0.04987				-1.09505	0.00665
0.03433	0.09872				-1.09224	0.00661
0.04109	0.14758				-1.08943	0.00657
0.04786	0.19787				-1.08662	0.00651
0.05462	0.2574				-1.08382	0.00641
0.06138	0.31693				-1.08101	0.00639
0.06814	0.37646				-1.0782	0.00637
0.07491	0.41971				-1.07539	0.00638
0.08167	0.38623				-1.07258	0.00641
0.08843	0.35275				-1.06977	0.00641
0.0952	0.31928				-1.06696	0.00638
0.10196	0.28581				-1.06415	0.00635
0.10872	0.25238				-1.06134	0.00633
0.11549	0.21895				-1.05853	0.00629
0.12225	0.18552				-1.05572	0.0062
0.12901	0.15673				-1.05291	0.00609
0.13577	0.13931				-1.0501	0.00601
0.14254	0.12189				-1.04729	0.00591
0.1493	0.10447				-1.04449	0.00582
0.15606	0.0904				-1.04168	0.00576
0.16283	0.08218				-1.03887	0.0057
0.16959	0.07397				-1.03606	0.00565
0.17635	0.06575				-1.03325	0.00559
0.18311	0.05905				-1.03044	0.00554
0.18988	0.05456				-1.02763	0.00547
0.19664	0.05008				-1.02482	0.00542
0.2034	0.0456				-1.02201	0.00536
0.21017	0.04196				-1.0192	0.0053
0.21693	0.03925				-1.01639	0.00525
0.22369	0.03655				-1.01358	0.0052
0.23046	0.03384				-1.01077	0.00515
0.23722	0.03152				-1.00796	0.00512
0.24398	0.02956				-1.00516	0.00511
0.25074	0.0276				-1.00235	0.00508
0.25751	0.02564				-0.99954	0.00503
0.26427	0.02402				-0.99673	0.00503
0.27103	0.02264				-0.99392	0.00503
0.2778	0.02125				-0.99111	0.00497
0.28456	0.01987				-0.9883	0.00494
0.29132	0.0188				-0.98549	0.00495
0.29809	0.01792				-0.98268	0.00496
0.30485	0.01704				-0.97987	0.00495
0.31161	0.01616				-0.97706	0.00491
0.31837	0.01533				-0.97425	0.00489
0.32514	0.01452				-0.97144	0.00485
0.3319	0.01371				-0.96863	0.00482
0.33866	0.0129				-0.96583	0.00483
0.34543	0.01221				-0.96302	0.00479
0.35219	0.01157				-0.96021	0.00473
0.35895	0.01093				-0.9574	0.00465
0.36571	0.01028				-0.95459	0.00459
0.37248	0.00976				-0.95178	0.00456
0.37924	0.00927				-0.94897	0.00456
0.386	0.00878				-0.94616	0.00455
0.39277	0.00828				-0.94335	0.00453
0.39953	0.00778				-0.94054	0.00453
0.40629	0.00727				-0.93773	0.00454
0.41306	0.00677				-0.93492	0.00456
0.41982	0.00626				-0.93211	0.00459
0.42658	0.00582				-0.9293	0.00464
0.43334	0.00539				-0.9265	0.00467
0.44011	0.00496				-0.92369	0.00471
0.44687	0.00452				-0.92088	0.00473
0.45363	0.00428				-0.91807	0.00469
0.4604	0.00404				-0.91526	0.00464
0.46716	0.0038				-0.91245	0.00465
0.47392	0.00356				-0.90964	0.00467
0.48069	0.00339				-0.90683	0.00474
0.48745	0.00322				-0.90402	0.00483
0.49421	0.00305				-0.90121	0.00498
0.50097	0.00287				-0.8984	0.0052
0.50774	0.00266				-0.89559	0.00542
0.5145	0.00245				-0.89278	0.00567
0.52126	0.00224				-0.88997	0.00594
0.52803	0.00202				-0.88717	0.00624
0.53479	0.00175				-0.88436	0.00657
0.54155	0.00148				-0.88155	0.00694
0.54831	0.00121				-0.87874	0.0073
0.55508	0.000963544				-0.87593	0.00766
0.56184	0.000834753				-0.87312	0.00796
0.5686	0.00070601				-0.87031	0.00823
0.57537	0.000577219				-0.8675	0.00838
0.58213	0.000451436				-0.86469	0.00849
0.58889	0.000333577				-0.86188	0.0086
0.59566	0.000215717				-0.85907	0.00869
0.60242	9.78581e-05				-0.85626	0.00876
0.60918	-1.04541e-05				-0.85345	0.00882
0.61594	-9.8049e-05				-0.85064	0.00885
0.62271	-0.000185644				-0.84784	0.0088
0.62947	-0.000273239				-0.84503	0.00873
0.63623	-0.00043406				-0.84222	0.00863
0.643	-0.000710068				-0.83941	0.00849
0.64976	-0.000986075				-0.8366	0.00833
0.65652	-0.00126				-0.83379	0.00818
0.66328	-0.00142				-0.83098	0.00803
0.67005	-0.00144				-0.82817	0.00787
0.67681	-0.00145				-0.82536	0.00772
0.68357	-0.00146				-0.82255	0.00759
0.69034	-0.0014				-0.81974	0.00745
0.6971	-0.00126				-0.81693	0.00733
0.70386	-0.00112				-0.81412	0.00719
0.71063	-0.000975669				-0.81131	0.00706
0.71739	-0.000894184				-0.80851	0.00694
0.72415	-0.00086201				-0.8057	0.00686
0.73091	-0.000829837				-0.80289	0.00683
0.73768	-0.000797663				-0.80008	0.00675
0.74444	-0.00092822				-0.79727	0.00666
0.7512	-0.00116				-0.79446	0.00657
0.75797	-0.00139				-0.79165	0.00647
0.76473	-0.00162				-0.78884	0.00638
0.77149	-0.00175				-0.78603	0.00629
0.77826	-0.00182				-0.78322	0.00619
0.78502	-0.00189				-0.78041	0.00609
0.79178	-0.00196				-0.7776	0.00601
0.79854	-0.00212				-0.77479	0.00595
0.80531	-0.00232				-0.77198	0.00588
0.81207	-0.00251				-0.76918	0.00583
0.81883	-0.0027				-0.76637	0.00582
0.8256	-0.00276				-0.76356	0.00581
0.83236	-0.00277				-0.76075	0.0058
0.83912	-0.00279				-0.75794	0.00577
0.84588	-0.00281				-0.75513	0.0057
0.85265	-0.00283				-0.75232	0.00564
0.85941	-0.00286				-0.74951	0.0056
0.86617	-0.00289				-0.7467	0.00558
0.87294	-0.00291				-0.74389	0.00556
0.8797	-0.00314				-0.74108	0.00551
0.88646	-0.0034				-0.73827	0.00545
0.89323	-0.00365				-0.73546	0.00538
0.89999	-0.00391				-0.73265	0.0053
0.90675	-0.00377				-0.72985	0.00523
0.91351	-0.00362				-0.72704	0.00514
0.92028	-0.00346				-0.72423	0.00506
0.92704	-0.0033				-0.72142	0.00503
0.9338	-0.00351				-0.71861	0.00501
0.94057	-0.00371				-0.7158	0.00499
0.94733	-0.00391				-0.71299	0.00494
0.95409	-0.00412				-0.71018	0.00489
0.96086	-0.00429				-0.70737	0.00485
0.96762	-0.00447				-0.70456	0.00483
0.97438	-0.00464				-0.70175	0.00481
0.98114	-0.00479				-0.69894	0.00475
0.98791	-0.0047				-0.69613	0.0047
0.99467	-0.0046				-0.69332	0.00467
1.00143	-0.00451				-0.69052	0.00465
1.0082	-0.0044				-0.68771	0.00461
1.01496	-0.00422				-0.6849	0.00455
1.02172	-0.00405				-0.68209	0.0045
1.02848	-0.00387				-0.67928	0.00448
1.03525	-0.00375				-0.67647	0.00448
1.04201	-0.00383				-0.67366	0.00448
1.04877	-0.00392				-0.67085	0.00446
1.05554	-0.004				-0.66804	0.00443
1.0623	-0.00407				-0.66523	0.00441
1.06906	-0.00414				-0.66242	0.00438
1.07583	-0.00421				-0.65961	0.00433
1.08259	-0.00428				-0.6568	0.00429
1.08935	-0.00431				-0.65399	0.00428
1.09611	-0.00427				-0.65119	0.00425
1.10288	-0.00422				-0.64838	0.00419
1.10964	-0.00417				-0.64557	0.00413
1.1164	-0.00419				-0.64276	0.00405
1.12317	-0.0043				-0.63995	0.00397
1.12993	-0.00442				-0.63714	0.00391
1.13669	-0.00453				-0.63433	0.00388
1.14345	-0.0045				-0.63152	0.00385
1.15022	-0.00431				-0.62871	0.00384
1.15698	-0.00411				-0.6259	0.00381
1.16374	-0.00391				-0.62309	0.00377
1.17051	-0.00383				-0.62028	0.00374
1.17727	-0.00383				-0.61747	0.00374
1.18403	-0.00384				-0.61466	0.00374
1.1908	-0.00384				-0.61186	0.00374
1.19756	-0.00397				-0.60905	0.00375
1.20432	-0.0042				-0.60624	0.00377
1.21108	-0.00443				-0.60343	0.00377
1.21785	-0.00466				-0.60062	0.00378
1.22461	-0.00466				-0.59781	0.00379
1.23137	-0.00454				-0.595	0.00377
1.23814	-0.00442				-0.59219	0.00377
1.2449	-0.0043				-0.58938	0.00377
1.25166	-0.00419				-0.58657	0.00374
1.25843	-0.0041				-0.58376	0.00372
1.26519	-0.00401				-0.58095	0.00374
1.27195	-0.00391				-0.57814	0.00375
1.27871	-0.00395				-0.57533	0.00374
1.28548	-0.00403				-0.57253	0.0037
1.29224	-0.0041				-0.56972	0.00363
1.299	-0.00418				-0.56691	0.00354
1.30577	-0.00416				-0.5641	0.00346
1.31253	-0.00412				-0.56129	0.00341
1.31929	-0.00407				-0.55848	0.00338
1.32605	-0.00403				-0.55567	0.00336
1.33282	-0.00381				-0.55286	0.00333
1.33958	-0.00356				-0.55005	0.00328
1.34634	-0.00332				-0.54724	0.0032
1.35311	-0.00307				-0.54443	0.00311
1.35987	-0.00301				-0.54162	0.00305
1.36663	-0.00296				-0.53881	0.00299
1.3734	-0.00292				-0.536	0.00297
1.38016	-0.00287				-0.5332	0.00298
1.38692	-0.00293				-0.53039	0.00299
1.39368	-0.00299				-0.52758	0.003
1.40045	-0.00306				-0.52477	0.003
1.40721	-0.00312				-0.52196	0.00299
1.41397	-0.00319				-0.51915	0.00299
1.42074	-0.00326				-0.51634	0.00299
1.4275	-0.00334				-0.51353	0.00297
1.43426	-0.0034				-0.51072	0.00294
1.44103	-0.00338				-0.50791	0.00293
1.44779	-0.00336				-0.5051	0.00293
1.45455	-0.00334				-0.50229	0.00291
1.46131	-0.00333				-0.49948	0.00287
1.46808	-0.00341				-0.49667	0.00282
1.47484	-0.00348				-0.49387	0.00279
1.4816	-0.00356				-0.49106	0.00277
1.48837	-0.00362				-0.48825	0.00275
1.49513	-0.00365				-0.48544	0.00272
1.50189	-0.00368				-0.48263	0.0027
1.50865	-0.00371				-0.47982	0.00269
1.51542	-0.00368				-0.47701	0.0027
1.52218	-0.00345				-0.4742	0.00269
1.52894	-0.00323				-0.47139	0.00268
1.53571	-0.003				-0.46858	0.00268
1.54247	-0.00287				-0.46577	0.00268
1.54923	-0.00294				-0.46296	0.0027
1.556	-0.003				-0.46015	0.00272
1.56276	-0.00307				-0.45734	0.00274
1.56952	-0.00314				-0.45454	0.00274
1.57628	-0.00322				-0.45173	0.00274
1.58305	-0.0033				-0.44892	0.00273
1.58981	-0.00339				-0.44611	0.00274
1.59657	-0.00342				-0.4433	0.00276
1.60334	-0.0034				-0.44049	0.00279
1.6101	-0.00338				-0.43768	0.00284
1.61686	-0.00336				-0.43487	0.0029
1.62362	-0.00341				-0.43206	0.00296
1.63039	-0.00355				-0.42925	0.00306
1.63715	-0.00369				-0.42644	0.00317
1.64391	-0.00383				-0.42363	0.00329
1.65068	-0.0039				-0.42082	0.00344
1.65744	-0.00391				-0.41801	0.00358
1.6642	-0.00393				-0.41521	0.00374
1.67097	-0.00394				-0.4124	0.00391
1.67773	-0.00396				-0.40959	0.00409
1.68449	-0.00399				-0.40678	0.00428
1.69125	-0.00402				-0.40397	0.00447
1.69802	-0.00405				-0.40116	0.00466
1.70478	-0.00404				-0.39835	0.00483
1.71154	-0.004				-0.39554	0.00498
1.71831	-0.00397				-0.39273	0.00514
1.72507	-0.00394				-0.38992	0.0053
1.73183	-0.00382				-0.38711	0.00545
1.7386	-0.00368				-0.3843	0.00558
1.74536	-0.00353				-0.38149	0.00567
1.75212	-0.00339				-0.37868	0.00574
1.75888	-0.00327				-0.37588	0.0058
1.76565	-0.00316				-0.37307	0.00585
1.77241	-0.00306				-0.37026	0.00589
1.77917	-0.00295				-0.36745	0.00592
1.78594	-0.00296				-0.36464	0.00592
1.7927	-0.00299				-0.36183	0.00593
1.79946	-0.00303				-0.35902	0.00593
1.80622	-0.00306				-0.35621	0.00594
1.81299	-0.00303				-0.3534	0.00596
1.81975	-0.003				-0.35059	0.00596
1.82651	-0.00297				-0.34778	0.00591
1.83328	-0.00294				-0.34497	0.00585
1.84004	-0.00305				-0.34216	0.0058
1.8468	-0.00316				-0.33935	0.00575
1.85357	-0.00327				-0.33655	0.00569
1.86033	-0.00338				-0.33374	0.00564
1.86709	-0.00343				-0.33093	0.00557
1.87385	-0.00348				-0.32812	0.00549
1.88062	-0.00353				-0.32531	0.00541
1.88738	-0.00357				-0.3225	0.00533
1.89414	-0.00342				-0.31969	0.00525
1.90091	-0.00327				-0.31688	0.00515
1.90767	-0.00312				-0.31407	0.00506
1.91443	-0.00301				-0.31126	0.00498
1.9212	-0.00318				-0.30845	0.00492
1.92796	-0.00336				-0.30564	0.00483
1.93472	-0.00354				-0.30283	0.00473
1.94148	-0.0037				-0.30002	0.00465
1.94825	-0.00374				-0.29721	0.00458
1.95501	-0.00377				-0.29441	0.00452
1.96177	-0.00381				-0.2916	0.00447
1.96854	-0.00376				-0.28879	0.00443
1.9753	-0.00342				-0.28598	0.00441
1.98206	-0.00307				-0.28317	0.00438
1.98882	-0.00273				-0.28036	0.00434
1.99559	-0.00253				-0.27755	0.00432
2.00235	-0.00269				-0.27474	0.00428
2.00911	-0.00284				-0.27193	0.00423
2.01588	-0.003				-0.26912	0.00417
2.02264	-0.00312				-0.26631	0.00412
2.0294	-0.00319				-0.2635	0.00409
2.03617	-0.00325				-0.26069	0.00408
2.04293	-0.00331				-0.25788	0.00406
2.04969	-0.00338				-0.25508	0.00402
2.05645	-0.00344				-0.25227	0.00398
2.06322	-0.00351				-0.24946	0.00394
2.06998	-0.00357				-0.24665	0.00391
2.07674	-0.00353				-0.24384	0.00386
2.08351	-0.00337				-0.24103	0.00381
2.09027	-0.00321				-0.23822	0.00378
2.09703	-0.00305				-0.23541	0.00374
2.1038	-0.00295				-0.2326	0.00371
2.11056	-0.00292				-0.22979	0.00369
2.11732	-0.00288				-0.22698	0.00366
2.12408	-0.00285				-0.22417	0.00362
2.13085	-0.00274				-0.22136	0.00358
2.13761	-0.00256				-0.21855	0.00355
2.14437	-0.00239				-0.21575	0.00353
2.15114	-0.00222				-0.21294	0.0035
2.1579	-0.00208				-0.21013	0.00347
2.16466	-0.00195				-0.20732	0.00343
2.17142	-0.00182				-0.20451	0.0034
2.17819	-0.00169				-0.2017	0.00338
2.18495	-0.00161				-0.19889	0.00336
2.19171	-0.00155				-0.19608	0.00334
2.19848	-0.00149				-0.19327	0.00331
2.20524	-0.00142				-0.19046	0.00329
2.212	-0.00125				-0.18765	0.00324
2.21877	-0.00103				-0.18484	0.0032
2.22553	-0.00080678				-0.18203	0.00316
2.23229	-0.000587005				-0.17922	0.00311
2.23905	-0.000655267				-0.17642	0.00306
2.24582	-0.00079055				-0.17361	0.00302
2.25258	-0.000925833				-0.1708	0.00298
2.25934	-0.00106				-0.16799	0.00294
2.26611	-0.00115				-0.16518	0.00291
2.27287	-0.00124				-0.16237	0.00287
2.27963	-0.00133				-0.15956	0.00283
2.2864	-0.00141				-0.15675	0.00281
2.29316	-0.00143				-0.15394	0.00281
2.29992	-0.00143				-0.15113	0.00281
2.30668	-0.00144				-0.14832	0.0028
2.31345	-0.00145				-0.14551	0.00281
2.32021	-0.0015				-0.1427	0.00282
2.32697	-0.00155				-0.13989	0.00283
2.33374	-0.00159				-0.13709	0.00285
2.3405	-0.00164				-0.13428	0.00287
2.34726	-0.00168				-0.13147	0.00286
2.35402	-0.00173				-0.12866	0.00286
2.36079	-0.00177				-0.12585	0.00287
2.36755	-0.00181				-0.12304	0.00288
2.37431	-0.00188				-0.12023	0.00288
2.38108	-0.00196				-0.11742	0.00287
2.38784	-0.00203				-0.11461	0.00283
2.3946	-0.00205				-0.1118	0.0028
2.40137	-0.0018				-0.10899	0.00279
2.40813	-0.00154				-0.10618	0.00279
2.41489	-0.00129				-0.10337	0.00278
2.42165	-0.00106				-0.10056	0.00276
2.42842	-0.00093643				-0.09776	0.00273
2.43518	-0.000816852				-0.09495	0.00272
2.44194	-0.000697322				-0.09214	0.00272
2.44871	-0.000586528				-0.08933	0.00272
2.45547	-0.000499888				-0.08652	0.0027
2.46223	-0.0004132				-0.08371	0.00267
2.469	-0.000326512				-0.0809	0.00263
2.47576	-0.000285602				-0.07809	0.00262
2.48252	-0.000347659				-0.07528	0.00262
2.48928	-0.000409715				-0.07247	0.00263
2.49605	-0.000471819				-0.06966	0.00262
2.50281	-0.000521273				-0.06685	0.0026
2.50957	-0.000550392				-0.06404	0.00257
2.51634	-0.000579511				-0.06123	0.00254
2.5231	-0.000608582				-0.05843	0.00252
2.52986	-0.000601851				-0.05562	0.00251
2.53662	-0.000546096				-0.05281	0.00249
2.54339	-0.000490388				-0.05	0.00247
2.55015	-0.000434633				-0.04719	0.00246
2.55691	-0.000412722				-0.04438	0.00248
2.56368	-0.000425229				-0.04157	0.00248
2.57044	-0.000437736				-0.03876	0.00246
2.5772	-0.000450243				-0.03595	0.00242
2.58397	-0.000402125				-0.03314	0.00239
2.59073	-0.000301498				-0.03033	0.00236
2.59749	-0.000200872				-0.02752	0.00234
2.60425	-0.000100293				-0.02471	0.00232
2.61102	-0.00010478				-0.0219	0.00233
2.61778	-0.000176574				-0.0191	0.00234
2.62454	-0.000248321				-0.01629	0.00235
2.63131	-0.000320068				-0.01348	0.00235
2.63807	-0.000368567				-0.01067	0.00204
2.64483	-0.00040456				-0.00786	-4.52905e-05
2.65159	-0.000440505				-0.00505	-6.97381e-07
2.65836	-0.000476497				-0.00224	3.48789e-05
2.66512	-0.000426375				0.00057	4.46717e-05
2.67188	-0.000343267				0.00338	-4.21572e-05
2.67865	-0.000260207				0.00619	-9.55707e-05
2.68541	-0.000177147				0.009	-0.00014753
2.69217	-0.000183544				0.01181	-0.000202751
2.69894	-0.000217579				0.01462	-0.00025421
2.7057	-0.000251615				0.01743	-0.000301534
2.71246	-0.000285698				0.02024	-0.000354211
2.71922	-0.000476163				0.02304	-0.000415796
2.72599	-0.000696988				0.02585	-0.00011107
2.73275	-0.000917813				0.02866	0.000469495
2.73951	-0.00114				0.03147	0.00178
2.74628	-0.00125				0.03428	0.00592
2.75304	-0.00134				0.03709	0.01233
2.7598	-0.00143				0.0399	0.01841
2.76656	-0.00152				0.04271	0.02373
2.77333	-0.00143				0.04552	0.02872
2.78009	-0.00133				0.04833	0.03382
2.78685	-0.00123				0.05114	0.03914
2.79362	-0.00113				0.05395	0.04421
2.80038	-0.00119				0.05676	0.04957
2.80714	-0.00126				0.05957	0.05496
2.81391	-0.00133				0.06237	0.06026
2.82067	-0.00138				0.06518	0.06519
2.82743	-0.00121				0.06799	0.06945
2.83419	-0.00103				0.0708	0.07342
2.84096	-0.000859433				0.07361	0.07632
2.84772	-0.000690353				0.07642	0.07512
2.85448	-0.000560035				0.07923	0.07246
2.86125	-0.000429669				0.08204	0.06999
2.86801	-0.00029935				0.08485	0.06808
2.87477	-0.000153136				0.08766	0.06625
2.88154	6.61139e-05				0.09047	0.06387
2.8883	0.000285316				0.09328	0.06127
2.89506	0.000504518				0.09609	0.05828
2.90182	0.0006978				0.0989	0.05514
2.90859	0.000798188				0.1017	0.05194
2.91535	0.000898624				0.10451	0.0487
2.92211	0.000999012				0.10732	0.04601
2.92888	0.00106				0.11013	0.04327
2.93564	0.00104				0.11294	0.04055
2.9424	0.00101				0.11575	0.03802
2.94916	0.000990753				0.11856	0.0356
2.95593	0.000991326				0.12137	0.03316
2.96269	0.00104				0.12418	0.03121
2.96945	0.00109				0.12699	0.02916
2.97622	0.00114				0.1298	0.02742
2.98298	0.00115				0.13261	0.02582
2.98974	0.00111				0.13542	0.02431
2.99651	0.00107				0.13823	0.02295
3.00327	0.00103				0.14103	0.02178
3.01003	0.00105				0.14384	0.02049
3.01679	0.00114				0.14665	0.01943
3.02356	0.00123				0.14946	0.01836
3.03032	0.00132				0.15227	0.01735
3.03708	0.0014				0.15508	0.01644
3.04385	0.00147				0.15789	0.01559
3.05061	0.00154				0.1607	0.01484
3.05737	0.00162				0.16351	0.01417
3.06414	0.00155				0.16632	0.01346
3.0709	0.00138				0.16913	0.01281
3.07766	0.00121				0.17194	0.01222
3.08442	0.00103				0.17475	0.01162
3.09119	0.000984786				0.17756	0.0111
3.09795	0.00101				0.18036	0.01059
3.10471	0.00103				0.18317	0.01013
3.11148	0.00106				0.18598	0.00973
3.11824	0.00119				0.18879	0.00936
3.125	0.00138				0.1916	0.00901
3.13176	0.00157				0.19441	0.00872
3.13853	0.00176				0.19722	0.0084
3.14529	0.00185				0.20003	0.00811
3.15205	0.00191				0.20284	0.00782
3.15882	0.00198				0.20565	0.00755
3.16558	0.00204				0.20846	0.00731
3.17234	0.00196				0.21127	0.00709
3.17911	0.00185				0.21408	0.00688
3.18587	0.00173				0.21689	0.00669
3.19263	0.00162				0.21969	0.00649
3.19939	0.00169				0.2225	0.0063
3.20616	0.00178				0.22531	0.00613
3.21292	0.00187				0.22812	0.00595
3.21968	0.00196				0.23093	0.00577
3.22645	0.00183				0.23374	0.00562
3.23321	0.00168				0.23655	0.0055
3.23997	0.00152				0.23936	0.00541
3.24674	0.00137				0.24217	0.00531
3.2535	0.00142				0.24498	0.00517
3.26026	0.00148				0.24779	0.00502
3.26702	0.00154				0.2506	0.00486
3.27379	0.0016				0.25341	0.0047
3.28055	0.00156				0.25622	0.00456
3.28731	0.00152				0.25902	0.00445
3.29408	0.00148				0.26183	0.00437
3.30084	0.00145				0.26464	0.0043
3.3076	0.00153				0.26745	0.00419
3.31436	0.00161				0.27026	0.0041
3.32113	0.00169				0.27307	0.004
3.32789	0.00178				0.27588	0.00388
3.33465	0.00197				0.27869	0.00375
3.34142	0.00215				0.2815	0.0036
3.34818	0.00233				0.28431	0.00348
3.35494	0.00248				0.28712	0.00341
3.36171	0.00248				0.28993	0.00334
3.36847	0.00247				0.29274	0.00329
3.37523	0.00247				0.29555	0.00325
3.38199	0.00243				0.29836	0.00321
3.38876	0.00224				0.30116	0.00313
3.39552	0.00206				0.30397	0.00304
3.40228	0.00188				0.30678	0.00295
3.40905	0.00177				0.30959	0.0029
3.41581	0.00184				0.3124	0.00284
3.42257	0.00191				0.31521	0.00277
3.42934	0.00197				0.31802	0.00271
3.4361	0.00198				0.32083	0.00264
3.44286	0.00187				0.32364	0.00258
3.44962	0.00176				0.32645	0.00251
3.45639	0.00165				0.32926	0.00245
3.46315	0.00159				0.33207	0.00239
3.46991	0.00161				0.33488	0.00234
3.47668	0.00162				0.33769	0.00228
3.48344	0.00164				0.34049	0.00222
3.4902	0.00157				0.3433	0.00216
3.49696	0.0014				0.34611	0.00211
3.50373	0.00124				0.34892	0.00205
3.51049	0.00107				0.35173	0.002
3.51725	0.00108				0.35454	0.00193
3.52402	0.00124				0.35735	0.00189
3.53078	0.0014				0.36016	0.00184
3.53754	0.00156				0.36297	0.00179
3.54431	0.00178				0.36578	0.00175
3.55107	0.00203				0.36859	0.0017
3.55783	0.00228				0.3714	0.00167
3.56459	0.00253				0.37421	0.00164
3.57136	0.00251				0.37702	0.00157
3.57812	0.00236				0.37982	0.0015
3.58488	0.00221				0.38263	0.00144
3.59165	0.00206				0.38544	0.00139
3.59841	0.00202				0.38825	0.00135
3.60517	0.00201				0.39106	0.00131
3.61193	0.002				0.39387	0.00126
3.6187	0.002				0.39668	0.00123
3.62546	0.00194				0.39949	0.0012
3.63222	0.00188				0.4023	0.00117
3.63899	0.00181				0.40511	0.00115
3.64575	0.00175				0.40792	0.00112
3.65251	0.00166				0.41073	0.00109
3.65928	0.00158				0.41354	0.00105
3.66604	0.00149				0.41635	0.00102
3.6728	0.0014				0.41915	0.001
3.67956	0.00154				0.42196	0.001
3.68633	0.0017				0.42477	0.000992059
3.69309	0.00187				0.42758	0.000965539
3.69985	0.00204				0.43039	0.000930454
3.70662	0.00214				0.4332	0.000898983
3.71338	0.00224				0.43601	0.00087095
3.72014	0.00233				0.43882	0.000829196
3.7269	0.00243				0.44163	0.000768259
3.73367	0.00225				0.44444	0.00071294
3.74043	0.00207				0.44725	0.000688492
3.74719	0.00189				0.45006	0.000668062
3.75396	0.00172				0.45287	0.000637799
3.76072	0.00178				0.45568	0.000596212
3.76748	0.00185				0.45848	0.000550627
3.77425	0.00191				0.46129	0.000512978
3.78101	0.00195				0.4641	0.000492665
3.78777	0.00185				0.46691	0.000470968
3.79453	0.00174				0.46972	0.000440961
3.8013	0.00164				0.47253	0.000414726
3.80806	0.00156				0.47534	0.000391732
3.81482	0.0016				0.47815	0.000374061
3.82159	0.00165				0.48096	0.000373914
3.82835	0.0017				0.48377	0.000389374
3.83511	0.00174				0.48658	0.000391083
3.84188	0.00177				0.48939	0.000371409
3.84864	0.0018				0.4922	0.000335872
3.8554	0.00182				0.49501	0.000300758
3.86216	0.00184				0.49781	0.000284649
3.86893	0.0018				0.50062	0.000268865
3.87569	0.00177				0.50343	0.000234772
3.88245	0.00173				0.50624	0.000192418
3.88922	0.00169				0.50905	0.000164042
3.89598	0.00162				0.51186	0.000153827
3.90274	0.00155				0.51467	0.000148257
3.9095	0.00149				0.51748	0.000129919
3.91627	0.00152				0.52029	0.0001061
3.92303	0.00169				0.5231	8.54537e-05
3.92979	0.00187				0.52591	7.23115e-05
3.93656	0.00205				0.52872	6.41787e-05
3.94332	0.00215				0.53153	5.63405e-05
3.95008	0.00217				0.53434	4.57521e-05
3.95685	0.00218				0.53714	4.66951e-05
3.96361	0.0022				0.53995	4.61647e-05
3.97037	0.00222				0.54276	4.68228e-05
3.97713	0.00224				0.54557	4.85908e-05
3.9839	0.00226				0.54838	4.63808e-05
3.99066	0.00228				0.55119	3.14705e-05
3.99742	0.00231				0.554	1.61085e-06
4.00419	0.00236				0.55681	-3.49083e-05
4.01095	0.0024				0.55962	-5.64289e-05
4.01771	0.00245				0.56243	-6.60253e-05
4.02448	0.00247				0.56524	-6.97676e-05
4.03124	0.00248				0.56805	-7.3117e-05
4.038	0.00249				0.57086	-8.05426e-05
4.04476	0.0025				0.57367	-9.67199e-05
4.05153	0.00247				0.57647	-0.00010885
4.05829	0.00243				0.57928	-0.000128171
4.06505	0.0024				0.58209	-0.000151175
4.07182	0.00236				0.5849	-0.000171271
4.07858	0.00231				0.58771	-0.000185906
4.08534	0.00226				0.59052	-0.000193047
4.0921	0.00221				0.59333	-0.000200875
4.09887	0.00216				0.59614	-0.00021498
4.10563	0.00233				0.59895	-0.000228721
4.11239	0.00256				0.60176	-0.000242109
4.11916	0.00279				0.60457	-0.000266959
4.12592	0.00303				0.60738	-0.000314283
4.13268	0.00319				0.61019	-0.000354535
4.13945	0.00333				0.613	-0.000379827
4.14621	0.00348				0.6158	-0.000397085
4.15297	0.00363				0.61861	-0.000407457
4.15973	0.00364				0.62142	-0.000409039
4.1665	0.00363				0.62423	-0.000403823
4.17326	0.00363				0.62704	-0.000410276
4.18002	0.00363				0.62985	-0.000429174
4.18679	0.00361				0.63266	-0.000452541
4.19355	0.00359				0.63547	-0.000474789
4.20031	0.00357				0.63828	-0.000492665
4.20708	0.00356				0.64109	-0.000505218
4.21384	0.00374				0.6439	-0.000500445
4.2206	0.00393				0.64671	-0.000486507
4.22736	0.00411				0.64952	-0.000475064
4.23413	0.00428				0.65233	-0.000475575
4.24089	0.00423				0.65513	-0.000485633
4.24765	0.00418				0.65794	-0.000493569
4.25442	0.00413				0.66075	-0.000498009
4.26118	0.00409				0.66356	-0.000504874
4.26794	0.00407				0.66637	-0.000524971
4.2747	0.00405				0.66918	-0.000543761
4.28147	0.00403				0.67199	-0.000554192
4.28823	0.00397				0.6748	-0.00055432
4.29499	0.00374				0.67761	-0.000542337
4.30176	0.00351				0.68042	-0.000535117
4.30852	0.00328				0.68323	-0.000548603
4.31528	0.00312				0.68604	-0.000571037
4.32205	0.00315				0.68885	-0.000599532
4.32881	0.00319				0.69166	-0.000628114
4.33557	0.00322				0.69446	-0.000648594
4.34233	0.0033				0.69727	-0.000655607
4.3491	0.00348				0.70008	-0.000663033
4.35586	0.00367				0.70289	-0.000681685
4.36262	0.00385				0.7057	-0.000713048
4.36939	0.00395				0.70851	-0.000747573
4.37615	0.0039				0.71132	-0.000771549
4.38291	0.00385				0.71413	-0.0007853
4.38968	0.0038				0.71694	-0.000816633
4.39644	0.00382				0.71975	-0.000843811
4.4032	0.00393				0.72256	-0.000857641
4.40996	0.00404				0.72537	-0.000861108
4.41673	0.00416				0.72818	-0.000860647
4.42349	0.00421				0.73099	-0.000857563
4.43025	0.00419				0.73379	-0.000849911
4.43702	0.00418				0.7366	-0.000839961
4.44378	0.00417				0.73941	-0.00084387
4.45054	0.00422				0.74222	-0.000855156
4.4573	0.00434				0.74503	-0.000857229
4.46407	0.00445				0.74784	-0.000837977
4.47083	0.00457				0.75065	-0.000810976
4.47759	0.00464				0.75346	-0.000788748
4.48436	0.00468				0.75627	-0.000771628
4.49112	0.00472				0.75908	-0.000769909
4.49788	0.00477				0.76189	-0.0007831
4.50465	0.00478				0.7647	-0.000800692
4.51141	0.00478				0.76751	-0.000814777
4.51817	0.00478				0.77032	-0.00082566
4.52493	0.00478				0.77312	-0.000836121
4.5317	0.0047				0.77593	-0.000848123
4.53846	0.0046				0.77874	-0.000862454
4.54522	0.0045				0.78155	-0.000876176
4.55199	0.0044				0.78436	-0.0008826
4.55875	0.00449				0.78717	-0.000886548
4.56551	0.00465				0.78998	-0.000883425
4.57227	0.00482				0.79279	-0.000878631
4.57904	0.00498				0.7956	-0.000873416
4.5858	0.005				0.79841	-0.000863977
4.59256	0.00499				0.80122	-0.000845471
4.59933	0.00498				0.80403	-0.000814217
4.60609	0.00498				0.80684	-0.000786086
4.61285	0.00481				0.80965	-0.000762483
4.61962	0.00463				0.81245	-0.000748192
4.62638	0.00445				0.81526	-0.000743644
4.63314	0.00426				0.81807	-0.000744577
4.6399	0.00411				0.82088	-0.000744901
4.64667	0.00396				0.82369	-0.000747386
4.65343	0.00381				0.8265	-0.000753741
4.66019	0.00367				0.82931	-0.000769015
4.66696	0.00371				0.83212	-0.000793846
4.67372	0.00376				0.83493	-0.000823519
4.68048	0.00382				0.83774	-0.000850137
4.68724	0.00386				0.84055	-0.000876402
4.69401	0.00387				0.84336	-0.000902234
4.70077	0.00388				0.84617	-0.000925307
4.70753	0.00388				0.84898	-0.000946552
4.7143	0.00388				0.85178	-0.000967405
4.72106	0.00377				0.85459	-0.000986991
4.72782	0.00367				0.8574	-0.000991057
4.73459	0.00356				0.86021	-0.000997029
4.74135	0.00348				0.86302	-0.00101
4.74811	0.00353				0.86583	-0.00101
4.75487	0.00357				0.86864	-0.00101
4.76164	0.00361				0.87145	-0.000980891
4.7684	0.00367				0.87426	-0.000952072
4.77516	0.0038				0.87707	-0.000951925
4.78193	0.00393				0.87988	-0.000957985
4.78869	0.00406				0.88269	-0.00096383
4.79545	0.00416				0.8855	-0.000969134
4.80222	0.00415				0.88831	-0.000974408
4.80898	0.00414				0.89111	-0.000977532
4.81574	0.00413				0.89392	-0.000970705
4.8225	0.00414				0.89673	-0.000961207
4.82927	0.00421				0.89954	-0.00094558
4.83603	0.00428				0.90235	-0.00092568
4.84279	0.00435				0.90516	-0.000905073
4.84956	0.00435				0.90797	-0.000888945
4.85632	0.00426				0.91078	-0.000892196
4.86308	0.00418				0.91359	-0.000905927
4.86984	0.00409				0.9164	-0.000923234
4.87661	0.00398				0.91921	-0.000931573
4.88337	0.00384				0.92202	-0.000937398
4.89013	0.0037				0.92483	-0.000952151
4.8969	0.00356				0.92764	-0.000971246
4.90366	0.00344				0.93044	-0.000986008
4.91042	0.00333				0.93325	-0.001
4.91719	0.00322				0.93606	-0.00102
4.92395	0.00311				0.93887	-0.00104
4.93071	0.00324				0.94168	-0.00106
4.93747	0.00357				0.94449	-0.00109
4.94424	0.0039				0.9473	-0.00112
4.951	0.00424				0.95011	-0.00115
4.95776	0.00443				0.95292	-0.00117
4.96453	0.00453				0.95573	-0.00118
4.97129	0.00464				0.95854	-0.00118
4.97805	0.00475				0.96135	-0.00118
4.98482	0.00476				0.96416	-0.00118
4.99158	0.00471				0.96697	-0.00117
4.99834	0.00467				0.96977	-0.00115
5.0051	0.00463				0.97258	-0.00113
5.01187	0.0046				0.97539	-0.00112
5.01863	0.00458				0.9782	-0.0011
5.02539	0.00456				0.98101	-0.0011
5.03216	0.00454				0.98382	-0.0011
5.03892	0.00448				0.98663	-0.0011
5.04568	0.00441				0.98944	-0.00109
5.05244	0.00434				0.99225	-0.00108
5.05921	0.00428				0.99506	-0.00107
5.06597	0.00436				0.99787	-0.00107
5.07273	0.00448				1.00068	-0.00108
5.0795	0.00459				1.00349	-0.00108
5.08626	0.00471				1.0063	-0.00109
5.09302	0.0047				1.0091	-0.00109
5.09979	0.00468				1.01191	-0.00111
5.10655	0.00467				1.01472	-0.00113
5.11331	0.00465				1.01753	-0.00116
5.12007	0.00471				1.02034	-0.00119
5.12684	0.00478				1.02315	-0.00122
5.1336	0.00485				1.02596	-0.00126
5.14036	0.00492				1.02877	-0.00129
5.14713	0.00491				1.03158	-0.00132
5.15389	0.0049				1.03439	-0.00135
5.16065	0.00488				1.0372	-0.00138
5.16742	0.00487				1.04001	-0.00141
5.17418	0.00495				1.04282	-0.00143
5.18094	0.00503				1.04563	-0.00144
5.1877	0.0051				1.04843	-0.00144
5.19447	0.00514				1.05124	-0.00143
5.20123	0.00495				1.05405	-0.00141
5.20799	0.00475				1.05686	-0.0014
5.21476	0.00455				1.05967	-0.00138
5.22152	0.0044				1.06248	-0.00137
5.22828	0.00446				1.06529	-0.00136
5.23504	0.00451				1.0681	-0.00135
5.24181	0.00456				1.07091	-0.00134
5.24857	0.00466				1.07372	-0.00133
5.25533	0.00491				1.07653	-0.00132
5.2621	0.00515				1.07934	-0.00131
5.26886	0.0054				1.08215	-0.0013
5.27562	0.00561				1.08496	-0.0013
5.28239	0.00574				1.08776	-0.00129
5.28915	0.00587				1.09057	-0.00129
5.29591	0.00601				1.09338	-0.0013
5.30267	0.00608				1.09619	-0.00131
5.30944	0.00604				1.099	-0.00132
5.3162	0.00599				1.10181	-0.00133
5.32296	0.00595				1.10462	-0.00135
5.32973	0.00595				1.10743	-0.00135
5.33649	0.00599				1.11024	-0.00135
5.34325	0.00604				1.11305	-0.00135
5.35002	0.00608				1.11586	-0.00135
5.35678	0.00601				1.11867	-0.00135
5.36354	0.00581				1.12148	-0.00136
5.3703	0.0056				1.12429	-0.00137
5.37707	0.0054				1.12709	-0.00138
5.38383	0.00523				1.1299	-0.00141
5.39059	0.00508				1.13271	-0.00143
5.39736	0.00494				1.13552	-0.00146
5.40412	0.0048				1.13833	-0.00149
5.41088	0.0048				1.14114	-0.00151
5.41764	0.0049				1.14395	-0.00151
5.42441	0.005				1.14676	-0.0015
5.43117	0.00511				1.14957	-0.0015
5.43793	0.00516				1.15238	-0.00151
5.4447	0.00519				1.15519	-0.00152
5.45146	0.00522				1.158	-0.00154
5.45822	0.00525				1.16081	-0.00154
5.46499	0.0052				1.16362	-0.00154
5.47175	0.00511				1.16642	-0.00154
5.47851	0.00503				1.16923	-0.00153
5.48527	0.00494				1.17204	-0.00152
5.49204	0.005				1.17485	-0.00149
5.4988	0.00512				1.17766	-0.00147
5.50556	0.00523				1.18047	-0.00144
5.51233	0.00534				1.18328	-0.00143
5.51909	0.00557				1.18609	-0.00144
5.52585	0.00582				1.1889	-0.00144
5.53261	0.00608				1.19171	-0.00143
5.53938	0.00633				1.19452	-0.00141
5.54614	0.00632				1.19733	-0.00139
5.5529	0.00628				1.20014	-0.00138
5.55967	0.00624				1.20295	-0.00135
5.56643	0.00619				1.20575	-0.00132
5.57319	0.00627				1.20856	-0.00127
5.57996	0.00636				1.21137	-0.00124
5.58672	0.00645				1.21418	-0.00121
5.59348	0.00653				1.21699	-0.00121
5.60024	0.00638				1.2198	-0.0012
5.60701	0.00622				1.22261	-0.00118
5.61377	0.00607				1.22542	-0.00117
5.62053	0.00593				1.22823	-0.00115
5.6273	0.00609				1.23104	-0.00113
5.63406	0.00625				1.23385	-0.00112
5.64082	0.00641				1.23666	-0.00112
5.64759	0.00655				1.23947	-0.00111
5.65435	0.00656				1.24228	-0.00112
5.66111	0.00656				1.24509	-0.00113
5.66787	0.00656				1.24789	-0.00117
5.67464	0.00656				1.2507	-0.00119
5.6814	0.00658				1.25351	-0.00118
5.68816	0.0066				1.25632	-0.00117
5.69493	0.00663				1.25913	-0.00117
5.70169	0.00664				1.26194	-0.00119
5.70845	0.00664				1.26475	-0.0012
5.71521	0.00663				1.26756	-0.00122
5.72198	0.00662				1.27037	-0.00123
5.72874	0.00656				1.27318	-0.00125
5.7355	0.00637				1.27599	-0.00126
5.74227	0.00618				1.2788	-0.00127
5.74903	0.00598				1.28161	-0.00128
5.75579	0.0059				1.28442	-0.0013
5.76256	0.00603				1.28722	-0.00131
5.76932	0.00617				1.29003	-0.00131
5.77608	0.0063				1.29284	-0.00133
5.78284	0.00635				1.29565	-0.00137
5.78961	0.00629				1.29846	-0.00139
5.79637	0.00622				1.30127	-0.00141
5.80313	0.00615				1.30408	-0.00141
5.8099	0.00606				1.30689	-0.00141
5.81666	0.00594				1.3097	-0.0014
5.82342	0.00582				1.31251	-0.0014
5.83018	0.00571				1.31532	-0.0014
5.83695	0.00574				1.31813	-0.00141
5.84371	0.0059				1.32094	-0.00142
5.85047	0.00606				1.32375	-0.00142
5.85724	0.00622				1.32655	-0.00142
5.864	0.00643				1.32936	-0.00141
5.87076	0.00667				1.33217	-0.00139
5.87753	0.00691				1.33498	-0.00138
5.88429	0.00714				1.33779	-0.00138
5.89105	0.00719				1.3406	-0.00138
5.89781	0.00714				1.34341	-0.00139
5.90458	0.00708				1.34622	-0.00141
5.91134	0.00702				1.34903	-0.00143
5.9181	0.00705				1.35184	-0.00145
5.92487	0.00713				1.35465	-0.00146
5.93163	0.0072				1.35746	-0.00146
5.93839	0.00728				1.36027	-0.00146
5.94516	0.00736				1.36308	-0.00145
5.95192	0.00745				1.36588	-0.00144
5.95868	0.00754				1.36869	-0.00142
5.96544	0.00762				1.3715	-0.00142
5.97221	0.00758				1.37431	-0.00142
5.97897	0.0075				1.37712	-0.00142
5.98573	0.00743				1.37993	-0.00141
5.9925	0.00735				1.38274	-0.00141
5.99926	0.00737				1.38555	-0.0014
6.00602	0.00741				1.38836	-0.00138
6.01278	0.00744				1.39117	-0.00136
6.01955	0.00748				1.39398	-0.00133
6.02631	0.00743				1.39679	-0.0013
6.03307	0.00737				1.3996	-0.00129
6.03984	0.00732				1.40241	-0.00127
6.0466	0.00726				1.40521	-0.00126
6.05336	0.00731				1.40802	-0.00126
6.06013	0.00735				1.41083	-0.00128
6.06689	0.0074				1.41364	-0.00131
6.07365	0.00745				1.41645	-0.00135
6.08041	0.00741				1.41926	-0.00139
6.08718	0.00737				1.42207	-0.00141
6.09394	0.00733				1.42488	-0.00142
6.1007	0.0073				1.42769	-0.00142
6.10747	0.00731				1.4305	-0.00142
6.11423	0.00733				1.43331	-0.00144
6.12099	0.00735				1.43612	-0.00146
6.12776	0.00737				1.43893	-0.00149
6.13452	0.00742				1.44174	-0.00151
6.14128	0.00747				1.44454	-0.00154
6.14804	0.00752				1.44735	-0.00155
6.15481	0.00756				1.45016	-0.00154
6.16157	0.00758				1.45297	-0.00155
6.16833	0.0076				1.45578	-0.00154
6.1751	0.00761				1.45859	-0.00153
6.18186	0.00766				1.4614	-0.00153
6.18862	0.00779				1.46421	-0.00154
6.19539	0.00792				1.46702	-0.00156
6.20215	0.00805				1.46983	-0.00158
6.20891	0.00812				1.47264	-0.00159
6.21567	0.00807				1.47545	-0.00161
6.22244	0.00802				1.47826	-0.00162
6.2292	0.00797				1.48107	-0.00163
6.23596	0.00796				1.48387	-0.00163
6.24273	0.008				1.48668	-0.00163
6.24949	0.00805				1.48949	-0.00163
6.25625	0.00809				1.4923	-0.00162
6.26301	0.00807				1.49511	-0.0016
6.26978	0.00797				1.49792	-0.00157
6.27654	0.00786				1.50073	-0.00155
6.2833	0.00776				1.50354	-0.00153
6.29007	0.00778				1.50635	-0.00151
6.29683	0.00793				1.50916	-0.00148
6.30359	0.00808				1.51197	-0.00145
6.31036	0.00824				1.51478	-0.00143
6.31712	0.00827				1.51759	-0.00142
6.32388	0.0082				1.5204	-0.00142
6.33064	0.00814				1.5232	-0.00141
6.33741	0.00807				1.52601	-0.0014
6.34417	0.00804				1.52882	-0.0014
6.35093	0.00802				1.53163	-0.00141
6.3577	0.00801				1.53444	-0.00144
6.36446	0.008				1.53725	-0.00147
6.37122	0.00805				1.54006	-0.0015
6.37799	0.00814				1.54287	-0.00151
6.38475	0.00822				1.54568	-0.00151
6.39151	0.00831				1.54849	-0.00151
6.39827	0.00835				1.5513	-0.00152
6.40504	0.00836				1.55411	-0.00154
6.4118	0.00838				1.55692	-0.00155
6.41856	0.0084				1.55973	-0.00156
6.42533	0.00834				1.56253	-0.00157
6.43209	0.00827				1.56534	-0.00158
6.43885	0.00819				1.56815	-0.00159
6.44561	0.00812				1.57096	-0.0016
6.45238	0.00805				1.57377	-0.00161
6.45914	0.008				1.57658	-0.00161
6.4659	0.00794				1.57939	-0.00161
6.47267	0.00788				1.5822	-0.00162
6.47943	0.00779				1.58501	-0.00162
6.48619	0.00769				1.58782	-0.00162
6.49296	0.0076				1.59063	-0.00163
6.49972	0.0075				1.59344	-0.00165
6.50648	0.00762				1.59625	-0.00168
6.51324	0.00776				1.59906	-0.00169
6.52001	0.00789				1.60186	-0.0017
6.52677	0.00802				1.60467	-0.0017
6.53353	0.00805				1.60748	-0.00169
6.5403	0.00808				1.61029	-0.00173
6.54706	0.00811				1.6131	-0.00177
6.55382	0.00814				1.61591	-0.0018
6.56058	0.00814				1.61872	-0.0018
6.56735	0.00813				1.62153	-0.00181
6.57411	0.00813				1.62434	-0.0018
6.58087	0.00813				1.62715	-0.00177
6.58764	0.00812				1.62996	-0.00176
6.5944	0.00811				1.63277	-0.00176
6.60116	0.0081				1.63558	-0.00177
6.60793	0.00811				1.63839	-0.00176
6.61469	0.00822				1.64119	-0.00175
6.62145	0.00833				1.644	-0.00175
6.62821	0.00845				1.64681	-0.00174
6.63498	0.00855				1.64962	-0.00171
6.64174	0.00861				1.65243	-0.00166
6.6485	0.00867				1.65524	-0.0016
6.65527	0.00873				1.65805	-0.00156
6.66203	0.00879				1.66086	-0.00155
6.66879	0.00885				1.66367	-0.00155
6.67556	0.00891				1.66648	-0.00158
6.68232	0.00897				1.66929	-0.00162
6.68908	0.009				1.6721	-0.00164
6.69584	0.00898				1.67491	-0.00163
6.70261	0.00895				1.67772	-0.00161
6.70937	0.00893				1.68052	-0.0016
6.71613	0.00896				1.68333	-0.0016
6.7229	0.00909				1.68614	-0.00161
6.72966	0.00921				1.68895	-0.00163
6.73642	0.00933				1.69176	-0.00166
6.74318	0.00938				1.69457	-0.00168
6.74995	0.00933				1.69738	-0.00168
6.75671	0.00929				1.70019	-0.00168
6.76347	0.00925				1.703	-0.0017
6.77024	0.00922				1.70581	-0.00172
6.777	0.0092				1.70862	-0.00172
6.78376	0.00919				1.71143	-0.00173
6.79053	0.00918				1.71424	-0.00176
6.79729	0.00918				1.71705	-0.00179
6.80405	0.00919				1.71985	-0.00179
6.81081	0.0092				1.72266	-0.00179
6.81758	0.00921				1.72547	-0.00179
6.82434	0.00926				1.72828	-0.00178
6.8311	0.00932				1.73109	-0.00178
6.83787	0.00939				1.7339	-0.00176
6.84463	0.00946				1.73671	-0.00177
6.85139	0.00944				1.73952	-0.00178
6.85815	0.0094				1.74233	-0.00178
6.86492	0.00935				1.74514	-0.00177
6.87168	0.00931				1.74795	-0.00175
6.87844	0.00932				1.75076	-0.00173
6.88521	0.00935				1.75357	-0.00172
6.89197	0.00938				1.75638	-0.0017
6.89873	0.00941				1.75918	-0.00169
6.9055	0.00943				1.76199	-0.00169
6.91226	0.00945				1.7648	-0.00169
6.91902	0.00946				1.76761	-0.0017
6.92578	0.00948				1.77042	-0.00171
6.93255	0.00953				1.77323	-0.00173
6.93931	0.00959				1.77604	-0.00176
6.94607	0.00965				1.77885	-0.00178
6.95284	0.00972				1.78166	-0.00179
6.9596	0.00971				1.78447	-0.00179
6.96636	0.0097				1.78728	-0.00179
6.97312	0.0097				1.79009	-0.00179
6.97989	0.00969				1.7929	-0.00178
6.98665	0.00963				1.79571	-0.00177
6.99341	0.00956				1.79851	-0.00177
7.00018	0.0095				1.80132	-0.00178
7.00694	0.00944				1.80413	-0.0018
7.0137	0.00953				1.80694	-0.00181
7.02047	0.00962				1.80975	-0.00182
7.02723	0.0097				1.81256	-0.00182
7.03399	0.0098				1.81537	-0.00181
7.04075	0.01007				1.81818	-0.00179
7.04752	0.01033				1.82099	-0.00179
7.05428	0.01059				1.8238	-0.0018
7.06104	0.01082				1.82661	-0.00181
7.06781	0.0109				1.82942	-0.00183
7.07457	0.01099				1.83223	-0.00184
7.08133	0.01107				1.83504	-0.00185
7.0881	0.01116				1.83784	-0.00185
7.09486	0.01133				1.84065	-0.00184
7.10162	0.01149				1.84346	-0.00186
7.10838	0.01166				1.84627	-0.00187
7.11515	0.01184				1.84908	-0.00188
7.12191	0.01205				1.85189	-0.0019
7.12867	0.01225				1.8547	-0.00193
7.13544	0.01246				1.85751	-0.00195
7.1422	0.01269				1.86032	-0.00195
7.14896	0.01294				1.86313	-0.00195
7.15572	0.01319				1.86594	-0.00195
7.16249	0.01344				1.86875	-0.00195
7.16925	0.01361				1.87156	-0.00195
7.17601	0.01366				1.87437	-0.00194
7.18278	0.0137				1.87717	-0.00194
7.18954	0.01374				1.87998	-0.00194
7.1963	0.01381				1.88279	-0.00194
7.20307	0.01391				1.8856	-0.00192
7.20983	0.01401				1.88841	-0.0019
7.21659	0.01411				1.89122	-0.00189
7.22335	0.01423				1.89403	-0.00187
7.23012	0.01436				1.89684	-0.00184
7.23688	0.01449				1.89965	-0.00182
7.24364	0.01462				1.90246	-0.00181
7.25041	0.01483				1.90527	-0.0018
7.25717	0.01511				1.90808	-0.0018
7.26393	0.01539				1.91089	-0.00179
7.27069	0.01567				1.9137	-0.00179
7.27746	0.01589				1.9165	-0.0018
7.28422	0.01606				1.91931	-0.0018
7.29098	0.01624				1.92212	-0.00181
7.29775	0.01641				1.92493	-0.00181
7.30451	0.01664				1.92774	-0.00181
7.31127	0.01689				1.93055	-0.0018
7.31804	0.01714				1.93336	-0.00179
7.3248	0.01739				1.93617	-0.00177
7.33156	0.01804				1.93898	-0.00176
7.33832	0.01883				1.94179	-0.00177
7.34509	0.01962				1.9446	-0.00177
7.35185	0.02041				1.94741	-0.00177
7.35861	0.02121				1.95022	-0.00177
7.36538	0.02201				1.95303	-0.00176
7.37214	0.0228				1.95583	-0.00176
7.3789	0.0236				1.95864	-0.00175
7.38567	0.02419				1.96145	-0.00174
7.39243	0.02474				1.96426	-0.00174
7.39919	0.02528				1.96707	-0.00175
7.40595	0.02583				1.96988	-0.00177
7.41272	0.02652				1.97269	-0.00179
7.41948	0.02724				1.9755	-0.0018
7.42624	0.02796				1.97831	-0.0018
7.43301	0.02868				1.98112	-0.00181
7.43977	0.02963				1.98393	-0.00184
7.44653	0.0306				1.98674	-0.00187
7.45329	0.03156				1.98955	-0.0019
7.46006	0.03252				1.99236	-0.00193
7.46682	0.03384				1.99516	-0.00195
7.47358	0.03517				1.99797	-0.00196
7.48035	0.03649				2.00078	-0.00195
7.48711	0.03782				2.00359	-0.00193
7.49387	0.03925				2.0064	-0.00193
7.50064	0.04068				2.00921	-0.00192
7.5074	0.04211				2.01202	-0.00191
7.51416	0.04355				2.01483	-0.0019
7.52092	0.04501				2.01764	-0.0019
7.52769	0.04647				2.02045	-0.0019
7.53445	0.04793				2.02326	-0.00189
7.54121	0.04942				2.02607	-0.00187
7.54798	0.051				2.02888	-0.00185
7.55474	0.05258				2.03169	-0.00183
7.5615	0.05416				2.03449	-0.00182
7.56826	0.05579				2.0373	-0.0018
7.57503	0.05763				2.04011	-0.0018
7.58179	0.05947				2.04292	-0.00182
7.58855	0.06131				2.04573	-0.00185
7.59532	0.06305				2.04854	-0.00186
7.60208	0.06457				2.05135	-0.00187
7.60884	0.06609				2.05416	-0.00186
7.61561	0.06761				2.05697	-0.00184
7.62237	0.06922				2.05978	-0.00183
7.62913	0.071				2.06259	-0.00181
7.63589	0.07279				2.0654	-0.00178
7.64266	0.07457				2.06821	-0.00177
7.64942	0.0762				2.07102	-0.00178
7.65618	0.07758				2.07382	-0.00178
7.66295	0.07897				2.07663	-0.00177
7.66971	0.08035				2.07944	-0.00176
7.67647	0.08155				2.08225	-0.00176
7.68324	0.08251				2.08506	-0.00177
7.69	0.08347				2.08787	-0.00177
7.69676	0.08444				2.09068	-0.00177
7.70352	0.08532				2.09349	-0.00178
7.71029	0.08613				2.0963	-0.00179
7.71705	0.08695				2.09911	-0.00181
7.72381	0.08776				2.10192	-0.00182
7.73058	0.08823				2.10473	-0.00183
7.73734	0.08843				2.10754	-0.00184
7.7441	0.08864				2.11035	-0.00183
7.75087	0.08884				2.11315	-0.00181
7.75763	0.08878				2.11596	-0.00181
7.76439	0.08858				2.11877	-0.00181
7.77115	0.08838				2.12158	-0.00182
7.77792	0.08818				2.12439	-0.00183
7.78468	0.08784				2.1272	-0.00183
7.79144	0.08743				2.13001	-0.00182
7.79821	0.08703				2.13282	-0.00181
7.80497	0.08662				2.13563	-0.0018
7.81173	0.08603				2.13844	-0.0018
7.81849	0.08538				2.14125	-0.00179
7.82526	0.08473				2.14406	-0.0018
7.83202	0.08409				2.14687	-0.00179
7.83878	0.08319				2.14968	-0.00179
7.84555	0.08222				2.15248	-0.00179
7.85231	0.08126				2.15529	-0.0018
7.85907	0.0803				2.1581	-0.0018
7.86584	0.07925				2.16091	-0.0018
7.8726	0.07819				2.16372	-0.00177
7.87936	0.07714				2.16653	-0.00175
7.88612	0.07608				2.16934	-0.00173
7.89289	0.0751				2.17215	-0.00172
7.89965	0.07413				2.17496	-0.00172
7.90641	0.07316				2.17777	-0.00171
7.91318	0.07219				2.18058	-0.00171
7.91994	0.07151				2.18339	-0.0017
7.9267	0.07084				2.1862	-0.00171
7.93347	0.07017				2.18901	-0.00173
7.94023	0.0695				2.19181	-0.00174
7.94699	0.06881				2.19462	-0.00173
7.95375	0.06813				2.19743	-0.00171
7.96052	0.06744				2.20024	-0.00169
7.96728	0.0668				2.20305	-0.00169
7.97404	0.06664				2.20586	-0.00171
7.98081	0.06648				2.20867	-0.00172
7.98757	0.06632				2.21148	-0.00173
7.99433	0.06625				2.21429	-0.00174
8.00109	0.06676				2.2171	-0.00174
8.00786	0.06726				2.21991	-0.00174
8.01462	0.06777				2.22272	-0.00174
8.02138	0.06838				2.22553	-0.00174
8.02815	0.06944				2.22834	-0.00173
8.03491	0.07049				2.23114	-0.00172
8.04167	0.07154				2.23395	-0.00172
8.04843	0.07278				2.23676	-0.00174
8.0552	0.07455				2.23957	-0.00175
8.06196	0.07633				2.24238	-0.00176
8.06872	0.0781				2.24519	-0.00175
8.07549	0.08014				2.248	-0.00175
8.08225	0.08274				2.25081	-0.00175
8.08901	0.08534				2.25362	-0.00176
8.09578	0.08794				2.25643	-0.00174
8.10254	0.09083				2.25924	-0.00173
8.1093	0.09423				2.26205	-0.00172
8.11606	0.09763				2.26486	-0.0017
8.12283	0.10104				2.26767	-0.00169
8.12959	0.10477				2.27047	-0.00168
8.13635	0.10892				2.27328	-0.00168
8.14312	0.11308				2.27609	-0.00169
8.14988	0.11724				2.2789	-0.00169
8.15664	0.12161				2.28171	-0.00169
8.1634	0.1262				2.28452	-0.0017
8.17017	0.1308				2.28733	-0.00172
8.17693	0.1354				2.29014	-0.00173
8.18369	0.14017				2.29295	-0.00173
8.19046	0.1451				2.29576	-0.00173
8.19722	0.15003				2.29857	-0.00174
8.20398	0.15496				2.30138	-0.00176
8.21075	0.15986				2.30419	-0.00179
8.21751	0.16473				2.307	-0.00183
8.22427	0.16961				2.3098	-0.00185
8.23103	0.17449				2.31261	-0.00185
8.2378	0.17934				2.31542	-0.00184
8.24456	0.18418				2.31823	-0.00183
8.25132	0.18901				2.32104	-0.00181
8.25809	0.19385				2.32385	-0.00179
8.26485	0.19824				2.32666	-0.00179
8.27161	0.20243				2.32947	-0.00177
8.27838	0.20663				2.33228	-0.00175
8.28514	0.21083				2.33509	-0.00173
8.2919	0.21387				2.3379	-0.00174
8.29866	0.21659				2.34071	-0.00174
8.30543	0.21931				2.34352	-0.00174
8.31219	0.22202				2.34633	-0.00172
8.31895	0.22387				2.34913	-0.00171
8.32572	0.22553				2.35194	-0.0017
8.33248	0.22719				2.35475	-0.0017
8.33924	0.22884				2.35756	-0.00171
8.346	0.22978				2.36037	-0.00173
8.35277	0.23063				2.36318	-0.00175
8.35953	0.23148				2.36599	-0.00177
8.36629	0.23233				2.3688	-0.00178
8.37306	0.2321				2.37161	-0.00179
8.37982	0.23178				2.37442	-0.0018
8.38658	0.23146				2.37723	-0.0018
8.39335	0.23114				2.38004	-0.00182
8.40011	0.22956				2.38285	-0.00183
8.40687	0.22799				2.38566	-0.00185
8.41363	0.22641				2.38846	-0.00186
8.4204	0.22478				2.39127	-0.00187
8.42716	0.22195				2.39408	-0.00189
8.43392	0.21912				2.39689	-0.00191
8.44069	0.2163				2.3997	-0.00193
8.44745	0.2134				2.40251	-0.00194
8.45421	0.20996				2.40532	-0.00195
8.46098	0.20652				2.40813	-0.00196
8.46774	0.20308				2.41094	-0.00196
8.4745	0.19958				2.41375	-0.00196
8.48126	0.19572				2.41656	-0.00195
8.48803	0.19187				2.41937	-0.00194
8.49479	0.18802				2.42218	-0.00192
8.50155	0.18408				2.42499	-0.0019
8.50832	0.17986				2.4278	-0.00189
8.51508	0.17565				2.4306	-0.00188
8.52184	0.17144				2.43341	-0.00187
8.52861	0.16721				2.43622	-0.00186
8.53537	0.16293				2.43903	-0.00184
8.54213	0.15866				2.44184	-0.00183
8.54889	0.15438				2.44465	-0.00183
8.55566	0.15018				2.44746	-0.00183
8.56242	0.14612				2.45027	-0.00179
8.56918	0.14206				2.45308	-0.00177
8.57595	0.138				2.45589	-0.00175
8.58271	0.13387				2.4587	-0.00174
8.58947	0.12961				2.46151	-0.00173
8.59623	0.12536				2.46432	-0.00173
8.603	0.12111				2.46713	-0.00174
8.60976	0.11713				2.46993	-0.00174
8.61652	0.11347				2.47274	-0.00173
8.62329	0.10981				2.47555	-0.00174
8.63005	0.10615				2.47836	-0.00174
8.63681	0.10274				2.48117	-0.00173
8.64358	0.09958				2.48398	-0.00171
8.65034	0.09642				2.48679	-0.00168
8.6571	0.09326				2.4896	-0.00167
8.66386	0.09028				2.49241	-0.00168
8.67063	0.08744				2.49522	-0.00171
8.67739	0.08461				2.49803	-0.00174
8.68415	0.08177				2.50084	-0.00175
8.69092	0.07899				2.50365	-0.00177
8.69768	0.07624				2.50646	-0.00179
8.70444	0.0735				2.50926	-0.0018
8.71121	0.07075				2.51207	-0.00181
8.71797	0.06847				2.51488	-0.00183
8.72473	0.0664				2.51769	-0.00184
8.73149	0.06432				2.5205	-0.00184
8.73826	0.06225				2.52331	-0.00186
8.74502	0.06037				2.52612	-0.00188
8.75178	0.05856				2.52893	-0.00189
8.75855	0.05676				2.53174	-0.0019
8.76531	0.05495				2.53455	-0.0019
8.77207	0.05345				2.53736	-0.0019
8.77883	0.05204				2.54017	-0.0019
8.7856	0.05062				2.54298	-0.00188
8.79236	0.0492				2.54579	-0.00185
8.79912	0.04786				2.54859	-0.00182
8.80589	0.04654				2.5514	-0.00179
8.81265	0.04522				2.55421	-0.00177
8.81941	0.04389				2.55702	-0.00175
8.82618	0.04278				2.55983	-0.00175
8.83294	0.04169				2.56264	-0.00174
8.8397	0.0406				2.56545	-0.00175
8.84646	0.03951				2.56826	-0.00176
8.85323	0.03853				2.57107	-0.00178
8.85999	0.03755				2.57388	-0.00178
8.86675	0.03658				2.57669	-0.00178
8.87352	0.03561				2.5795	-0.00177
8.88028	0.03493				2.58231	-0.00178
8.88704	0.03426				2.58512	-0.0018
8.89381	0.03358				2.58792	-0.00183
8.90057	0.03292				2.59073	-0.00185
8.90733	0.03251				2.59354	-0.00186
8.91409	0.03209				2.59635	-0.00187
8.92086	0.03167				2.59916	-0.00187
8.92762	0.03128				2.60197	-0.00187
8.93438	0.03103				2.60478	-0.00186
8.94115	0.03078				2.60759	-0.00182
8.94791	0.03053				2.6104	-0.00178
8.95467	0.03025				2.61321	-0.00175
8.96143	0.02981				2.61602	-0.00175
8.9682	0.02937				2.61883	-0.00175
8.97496	0.02893				2.62164	-0.00175
8.98172	0.02852				2.62445	-0.00172
8.98849	0.02819				2.62725	-0.0017
8.99525	0.02785				2.63006	-0.0017
9.00201	0.02751				2.63287	-0.0017
9.00878	0.02726				2.63568	-0.0017
9.01554	0.02719				2.63849	-0.00169
9.0223	0.02712				2.6413	-0.00168
9.02906	0.02706				2.64411	-0.00167
9.03583	0.02705				2.64692	-0.00168
9.04259	0.02713				2.64973	-0.0017
9.04935	0.02721				2.65254	-0.00172
9.05612	0.0273				2.65535	-0.00172
9.06288	0.02734				2.65816	-0.00171
9.06964	0.02731				2.66097	-0.00169
9.0764	0.02729				2.66378	-0.00169
9.08317	0.02727				2.66658	-0.0017
9.08993	0.02723				2.66939	-0.0017
9.09669	0.02719				2.6722	-0.0017
9.10346	0.02714				2.67501	-0.0017
9.11022	0.0271				2.67782	-0.00172
9.11698	0.02711				2.68063	-0.00174
9.12375	0.02718				2.68344	-0.00174
9.13051	0.02725				2.68625	-0.00174
9.13727	0.02731				2.68906	-0.00173
9.14403	0.02745				2.69187	-0.0017
9.1508	0.02765				2.69468	-0.00168
9.15756	0.02784				2.69749	-0.00166
9.16432	0.02803				2.7003	-0.00167
9.17109	0.02824				2.70311	-0.00169
9.17785	0.02846				2.70591	-0.0017
9.18461	0.02869				2.70872	-0.0017
9.19137	0.02891				2.71153	-0.00169
9.19814	0.02925				2.71434	-0.00167
9.2049	0.02964				2.71715	-0.00162
9.21166	0.03003				2.71996	-0.00158
9.21843	0.03042				2.72277	-0.00156
9.22519	0.0306				2.72558	-0.00154
9.23195	0.03072				2.72839	-0.00154
9.23872	0.03083				2.7312	-0.00156
9.24548	0.03094				2.73401	-0.00159
9.25224	0.03137				2.73682	-0.00162
9.259	0.03186				2.73963	-0.00162
9.26577	0.03235				2.74244	-0.00162
9.27253	0.03285				2.74524	-0.00161
9.27929	0.03319				2.74805	-0.00162
9.28606	0.03352				2.75086	-0.00162
9.29282	0.03385				2.75367	-0.00162
9.29958	0.03417				2.75648	-0.00163
9.30635	0.03453				2.75929	-0.00165
9.31311	0.03489				2.7621	-0.00167
9.31987	0.03525				2.76491	-0.00168
9.32663	0.03562				2.76772	-0.0017
9.3334	0.03611				2.77053	-0.0017
9.34016	0.03661				2.77334	-0.0017
9.34692	0.03711				2.77615	-0.0017
9.35369	0.03759				2.77896	-0.00171
9.36045	0.03791				2.78177	-0.00172
9.36721	0.03823				2.78457	-0.00172
9.37397	0.03855				2.78738	-0.00173
9.38074	0.03889				2.79019	-0.00172
9.3875	0.03946				2.793	-0.00172
9.39426	0.04002				2.79581	-0.00172
9.40103	0.04059				2.79862	-0.00172
9.40779	0.04115				2.80143	-0.00173
9.41455	0.04169				2.80424	-0.00173
9.42132	0.04222				2.80705	-0.00173
9.42808	0.04275				2.80986	-0.00172
9.43484	0.04331				2.81267	-0.00171
9.4416	0.044				2.81548	-0.0017
9.44837	0.04468				2.81829	-0.0017
9.45513	0.04536				2.8211	-0.00169
9.46189	0.04603				2.8239	-0.00167
9.46866	0.04665				2.82671	-0.00166
9.47542	0.04727				2.82952	-0.00165
9.48218	0.04789				2.83233	-0.00164
9.48894	0.04867				2.83514	-0.00165
9.49571	0.04974				2.83795	-0.00165
9.50247	0.05082				2.84076	-0.00165
9.50923	0.0519				2.84357	-0.00164
9.516	0.05298				2.84638	-0.00164
9.52276	0.05404				2.84919	-0.00165
9.52952	0.0551				2.852	-0.00167
9.53629	0.05617				2.85481	-0.00168
9.54305	0.05733				2.85762	-0.00169
9.54981	0.05863				2.86043	-0.00169
9.55657	0.05993				2.86323	-0.00171
9.56334	0.06123				2.86604	-0.00172
9.5701	0.06262				2.86885	-0.00174
9.57686	0.0641				2.87166	-0.00176
9.58363	0.06557				2.87447	-0.00178
9.59039	0.06705				2.87728	-0.0018
9.59715	0.06852				2.88009	-0.00181
9.60391	0.07				2.8829	-0.00183
9.61068	0.07147				2.88571	-0.00185
9.61744	0.07294				2.88852	-0.00188
9.6242	0.0746				2.89133	-0.0019
9.63097	0.07637				2.89414	-0.00192
9.63773	0.07814				2.89695	-0.00193
9.64449	0.07991				2.89976	-0.00193
9.65126	0.0817				2.90256	-0.00192
9.65802	0.08351				2.90537	-0.0019
9.66478	0.08531				2.90818	-0.00187
9.67154	0.08712				2.91099	-0.00183
9.67831	0.08917				2.9138	-0.00179
9.68507	0.09131				2.91661	-0.00179
9.69183	0.09345				2.91942	-0.0018
9.6986	0.09559				2.92223	-0.00181
9.70536	0.09763				2.92504	-0.00181
9.71212	0.09963				2.92785	-0.00179
9.71889	0.10164				2.93066	-0.00176
9.72565	0.10365				2.93347	-0.00172
9.73241	0.10575				2.93628	-0.00169
9.73917	0.10787				2.93909	-0.00167
9.74594	0.10998				2.94189	-0.00166
9.7527	0.1121				2.9447	-0.00166
9.75946	0.11484				2.94751	-0.00165
9.76623	0.11765				2.95032	-0.00165
9.77299	0.12046				2.95313	-0.00165
9.77975	0.12326				2.95594	-0.00166
9.78651	0.12637				2.95875	-0.00166
9.79328	0.12948				2.96156	-0.00165
9.80004	0.1326				2.96437	-0.00165
9.8068	0.13572				2.96718	-0.00165
9.81357	0.13936				2.96999	-0.00166
9.82033	0.143				2.9728	-0.00168
9.82709	0.14664				2.97561	-0.0017
9.83386	0.15042				2.97842	-0.00172
9.84062	0.1556				2.98122	-0.00173
9.84738	0.16078				2.98403	-0.00173
9.85414	0.16595				2.98684	-0.00173
9.86091	0.17135				2.98965	-0.00175
9.86767	0.17829				2.99246	-0.00177
9.87443	0.18523				2.99527	-0.00178
9.8812	0.19218				2.99808	-0.00176
9.88796	0.19953				3.00089	-0.00173
9.89472	0.20859				3.0037	-0.00172
9.90148	0.21764				3.00651	-0.0017
9.90825	0.22669				3.00932	-0.00169
9.91501	0.23644				3.01213	-0.00167
9.92177	0.24846				3.01494	-0.00165
9.92854	0.26048				3.01775	-0.00162
9.9353	0.27249				3.02055	-0.00159
9.94206	0.28553				3.02336	-0.00157
9.94883	0.30085				3.02617	-0.00156
9.95559	0.31617				3.02898	-0.00156
9.96235	0.33149				3.03179	-0.00156
9.96911	0.34774				3.0346	-0.00157
9.97588	0.36575				3.03741	-0.00161
9.98264	0.38375				3.04022	-0.00165
9.9894	0.40175				3.04303	-0.00167
9.99617	0.42068				3.04584	-0.00168
10.0029	0.44088				3.04865	-0.00169
10.0097	0.46108				3.05146	-0.00169
10.0165	0.48128				3.05427	-0.00169
10.0232	0.50219				3.05708	-0.0017
10.03	0.52392				3.05988	-0.00173
10.0367	0.54565				3.06269	-0.00175
10.0435	0.56738				3.0655	-0.00176
10.0503	0.58947				3.06831	-0.00175
10.057	0.61187				3.07112	-0.00175
10.0638	0.63428				3.07393	-0.00176
10.0706	0.65668				3.07674	-0.00176
10.0773	0.67878				3.07955	-0.00176
10.0841	0.70065				3.08236	-0.00175
10.0908	0.72253				3.08517	-0.00174
10.0976	0.74441				3.08798	-0.00174
10.1044	0.76467				3.09079	-0.00176
10.1111	0.78407				3.0936	-0.00177
10.1179	0.80348				3.09641	-0.0018
10.1247	0.82288				3.09921	-0.00182
10.1314	0.84061				3.10202	-0.00183
10.1382	0.8576				3.10483	-0.00183
10.1449	0.8746				3.10764	-0.00184
10.1517	0.89159				3.11045	-0.00185
10.1585	0.90566				3.11326	-0.00185
10.1652	0.91885				3.11607	-0.00183
10.172	0.93203				3.11888	-0.00181
10.1788	0.94522				3.12169	-0.00179
10.1855	0.95507				3.1245	-0.00178
10.1923	0.96413				3.12731	-0.00177
10.1991	0.97319				3.13012	-0.00174
10.2058	0.98225				3.13293	-0.00171
10.2126	0.98705				3.13574	-0.00168
10.2193	0.99129				3.13854	-0.00164
10.2261	0.99552				3.14135	-0.00161
10.2329	0.99975				3.14416	-0.00158
10.2396	1				3.14697	-0.00157
10.2464	0.99991				3.14978	-0.00157
10.2532	0.99983				3.15259	-0.00157
10.2599	0.99974				3.1554	-0.00157
10.2667	0.99571				3.15821	-0.00158
10.2735	0.99166				3.16102	-0.0016
10.2802	0.98761				3.16383	-0.00163
10.287	0.98344				3.16664	-0.00165
10.2937	0.9758				3.16945	-0.00166
10.3005	0.96817				3.17226	-0.00169
10.3073	0.96053				3.17507	-0.00172
10.314	0.95256				3.17787	-0.00174
10.3208	0.94184				3.18068	-0.00177
10.3276	0.93112				3.18349	-0.00178
10.3343	0.9204				3.1863	-0.00179
10.3411	0.90937				3.18911	-0.00179
10.3478	0.89658				3.19192	-0.00177
10.3546	0.88379				3.19473	-0.00176
10.3614	0.87099				3.19754	-0.00175
10.3681	0.85788				3.20035	-0.00173
10.3749	0.84363				3.20316	-0.00171
10.3817	0.82939				3.20597	-0.00171
10.3884	0.81514				3.20878	-0.00171
10.3952	0.80066				3.21159	-0.00171
10.4019	0.78552				3.2144	-0.0017
10.4087	0.77038				3.2172	-0.00168
10.4155	0.75524				3.22001	-0.00167
10.4222	0.74017				3.22282	-0.00167
10.429	0.72525				3.22563	-0.00167
10.4358	0.71034				3.22844	-0.00167
10.4425	0.69542				3.23125	-0.00168
10.4493	0.68035				3.23406	-0.0017
10.456	0.66504				3.23687	-0.00171
10.4628	0.64972				3.23968	-0.00172
10.4696	0.63441				3.24249	-0.00173
10.4763	0.61958				3.2453	-0.00174
10.4831	0.60534				3.24811	-0.00174
10.4899	0.5911				3.25092	-0.00175
10.4966	0.57686				3.25373	-0.00177
10.5034	0.56295				3.25653	-0.00178
10.5101	0.54938				3.25934	-0.00178
10.5169	0.5358				3.26215	-0.00176
10.5237	0.52223				3.26496	-0.00174
10.5304	0.5093				3.26777	-0.00171
10.5372	0.49687				3.27058	-0.00169
10.544	0.48443				3.27339	-0.00168
10.5507	0.47199				3.2762	-0.00168
10.5575	0.46019				3.27901	-0.00168
10.5643	0.44882				3.28182	-0.00167
10.571	0.43745				3.28463	-0.00165
10.5778	0.42607				3.28744	-0.00162
10.5845	0.41559				3.29025	-0.00159
10.5913	0.40552				3.29306	-0.00155
10.5981	0.39545				3.29586	-0.00151
10.6048	0.38539				3.29867	-0.00148
10.6116	0.37584				3.30148	-0.00148
10.6184	0.36649				3.30429	-0.00148
10.6251	0.35714				3.3071	-0.00147
10.6319	0.34779				3.30991	-0.00146
10.6387	0.33947				3.31272	-0.00147
10.6454	0.33142				3.31553	-0.00148
10.6522	0.32336				3.31834	-0.00148
10.6589	0.31531				3.32115	-0.00149
10.6657	0.30797				3.32396	-0.00151
10.6725	0.30078				3.32677	-0.00152
10.6792	0.29359				3.32958	-0.00152
10.686	0.2864				3.33239	-0.0015
10.6928	0.28021				3.33519	-0.0015
10.6995	0.27412				3.338	-0.00151
10.7063	0.26803				3.34081	-0.00151
10.713	0.26194				3.34362	-0.00151
10.7198	0.25613				3.34643	-0.00151
10.7266	0.25033				3.34924	-0.00151
10.7333	0.24453				3.35205	-0.00151
10.7401	0.23875				3.35486	-0.00151
10.7469	0.23384				3.35767	-0.0015
10.7536	0.22893				3.36048	-0.0015
10.7604	0.22402				3.36329	-0.00148
10.7671	0.21915				3.3661	-0.00147
10.7739	0.21494				3.36891	-0.00147
10.7807	0.21072				3.37172	-0.00149
10.7874	0.20651				3.37452	-0.00152
10.7942	0.20236				3.37733	-0.00153
10.801	0.19862				3.38014	-0.00152
10.8077	0.19489				3.38295	-0.00152
10.8145	0.19115				3.38576	-0.00153
10.8212	0.18747				3.38857	-0.00155
10.828	0.18401				3.39138	-0.00157
10.8348	0.18055				3.39419	-0.00159
10.8415	0.1771				3.397	-0.00161
10.8483	0.17378				3.39981	-0.00161
10.8551	0.17087				3.40262	-0.0016
10.8618	0.16797				3.40543	-0.0016
10.8686	0.16507				3.40824	-0.0016
10.8753	0.16227				3.41105	-0.00162
10.8821	0.15975				3.41385	-0.00161
10.8889	0.15723				3.41666	-0.00159
10.8956	0.1547				3.41947	-0.00158
10.9024	0.15218				3.42228	-0.00156
10.9092	0.14965				3.42509	-0.00154
10.9159	0.14713				3.4279	-0.00152
10.9227	0.1446				3.43071	-0.00151
10.9295	0.14218				3.43352	-0.00149
10.9362	0.13992				3.43633	-0.00148
10.943	0.13765				3.43914	-0.00148
10.9497	0.13539				3.44195	-0.00149
10.9565	0.13333				3.44476	-0.0015
10.9633	0.1315				3.44757	-0.00149
10.97	0.12967				3.45038	-0.00147
10.9768	0.12783				3.45318	-0.00145
10.9836	0.12613				3.45599	-0.00145
10.9903	0.12455				3.4588	-0.00146
10.9971	0.12297				3.46161	-0.00146
11.0038	0.1214				3.46442	-0.00145
11.0106	0.11979				3.46723	-0.00144
11.0174	0.11816				3.47004	-0.00143
11.0241	0.11653				3.47285	-0.00141
11.0309	0.1149				3.47566	-0.0014
11.0377	0.11329				3.47847	-0.00139
11.0444	0.1117				3.48128	-0.00137
11.0512	0.11011				3.48409	-0.00134
11.0579	0.10851				3.4869	-0.00133
11.0647	0.10715				3.48971	-0.00132
11.0715	0.10588				3.49251	-0.00131
11.0782	0.10461				3.49532	-0.00132
11.085	0.10335				3.49813	-0.00132
11.0918	0.10216				3.50094	-0.00132
11.0985	0.10099				3.50375	-0.00136
11.1053	0.09983				3.50656	-0.00139
11.1121	0.09867				3.50937	-0.00141
11.1188	0.09759				3.51218	-0.00143
11.1256	0.09652				3.51499	-0.00146
11.1323	0.09546				3.5178	-0.00149
11.1391	0.09439				3.52061	-0.00151
11.1459	0.09326				3.52342	-0.00152
11.1526	0.09211				3.52623	-0.00152
11.1594	0.09096				3.52904	-0.00152
11.1662	0.08981				3.53184	-0.00153
11.1729	0.08877				3.53465	-0.00152
11.1797	0.08774				3.53746	-0.00152
11.1865	0.08671				3.54027	-0.00152
11.1932	0.08567				3.54308	-0.00151
11.2	0.08467				3.54589	-0.00151
11.2067	0.08367				3.5487	-0.00152
11.2135	0.08267				3.55151	-0.00153
11.2203	0.08168				3.55432	-0.00154
11.227	0.08083				3.55713	-0.00155
11.2338	0.07997				3.55994	-0.00154
11.2406	0.07912				3.56275	-0.00153
11.2473	0.07829				3.56556	-0.00152
11.2541	0.07768				3.56837	-0.00152
11.2608	0.07708				3.57117	-0.00152
11.2676	0.07648				3.57398	-0.00153
11.2744	0.0759				3.57679	-0.00153
11.2811	0.07549				3.5796	-0.00154
11.2879	0.07507				3.58241	-0.00155
11.2947	0.07465				3.58522	-0.00156
11.3014	0.07421				3.58803	-0.00157
11.3082	0.07365				3.59084	-0.00158
11.3149	0.0731				3.59365	-0.00157
11.3217	0.07255				3.59646	-0.00157
11.3285	0.07198				3.59927	-0.00156
11.3352	0.07135				3.60208	-0.00155
11.342	0.07072				3.60489	-0.00154
11.3488	0.07009				3.6077	-0.00154
11.3555	0.06948				3.6105	-0.00155
11.3623	0.06892				3.61331	-0.00156
11.369	0.06836				3.61612	-0.00157
11.3758	0.0678				3.61893	-0.00156
11.3826	0.06717				3.62174	-0.00156
11.3893	0.06642				3.62455	-0.00155
11.3961	0.06567				3.62736	-0.00154
11.4029	0.06492				3.63017	-0.00153
11.4096	0.06425				3.63298	-0.00151
11.4164	0.06367				3.63579	-0.0015
11.4231	0.06309				3.6386	-0.0015
11.4299	0.06252				3.64141	-0.0015
11.4367	0.0621				3.64422	-0.00152
11.4434	0.06185				3.64703	-0.00154
11.4502	0.0616				3.64983	-0.00156
11.457	0.06134				3.65264	-0.00158
11.4637	0.06096				3.65545	-0.00159
11.4705	0.06047				3.65826	-0.0016
11.4772	0.05998				3.66107	-0.00162
11.484	0.05948				3.66388	-0.00164
11.4908	0.05917				3.66669	-0.00168
11.4975	0.05896				3.6695	-0.00171
11.5043	0.05875				3.67231	-0.00174
11.5111	0.05854				3.67512	-0.00176
11.5178	0.05819				3.67793	-0.00178
11.5246	0.05777				3.68074	-0.0018
11.5314	0.05735				3.68355	-0.0018
11.5381	0.05692				3.68636	-0.0018
11.5449	0.05657				3.68916	-0.00179
11.5517	0.05625				3.69197	-0.00179
11.5584	0.05592				3.69478	-0.00178
11.5652	0.05559				3.69759	-0.00178
11.5719	0.05536				3.7004	-0.00178
11.5787	0.05515				3.70321	-0.00178
11.5855	0.05495				3.70602	-0.00177
11.5922	0.05474				3.70883	-0.00176
11.599	0.05447				3.71164	-0.00174
11.6058	0.05419				3.71445	-0.00173
11.6125	0.0539				3.71726	-0.00172
[truncated: 5,085 more rows]
