# Supplementary material for: Dynamic Na+/H+ exchanger 1 (NHE1) – calmodulin complexes of varying stoichiometry and structure regulate Ca2+-dependent NHE1 activation
Source: eLife. 2021 Mar 3;10:e60889. doi: 10.7554/eLife.60889 (PMC8009664; doi:10.7554/eLife.60889)
Supplement: Figure 5—source data 1. [file elife-60889-fig5-data1.xlsx]

## Sheet: Ark1
WB quantification pH lysates n=1-6				Date:	2018-12-20		b-actin 1s	NHE1 2s
n=1	b-actin	b-actin norm. to WT		NHE1	NHE1 norm. to its b-actin		NHE1 norm to WT		CaM	Norm. to its b-actin	Norm. to WT
WT C1	15512.5	1		22052.2	22052.2		1		8221.95	8221.95	1
F395Y C5	16409.3	1.05781		50760.8	47986.6		2.17604		8080.37	7638.77	0.92907
1K3R1D3E C6	14705.3	0.947963		63562	67051.2		3.04056		10582.1	11163	1.3577
S648A C2.1	12423.5	0.80087		42943.7	53621.3		2.43156		8894.85	11106.5	1.35083
S648D C3	13136.8	0.846855		63419	74887.7		3.39592		9233.27	10903	1.32608
n=2
WT C1	11344.6	1		15344.6	15344.6		1		5717.88	5717.88	1
F395Y C5	11193.1	0.986649		44854	45461		2.96267		7029.2	7124.31	1.24597
1K3R1D3E C6	11385.4	1.0036		40899.8	40753.2		2.65586		7311.49	7285.27	1.27412
S648A C2.1	10387.2	0.915612		22758.9	24856.5		1.61988		8118.61	8866.86	1.55073
S648D C3	11467.8	1.01086		43901.4	43429.8		2.8303		8096.2	8009.22	1.40073
PS120	8120.34	0.71579		693.314	968.6		0.0631231		7219.25	10085.7	1.76389
n=3
WT C1	20333.6	1		27176.6	27176.6		1		9611.85	9611.85	1
F395Y C5	22128.4	1.08827		56310.8	51743.5		1.90397		11876.9	10913.6	1.13543
1K3R1D3E C6	19356.1	0.951927		49079.7	51558.2		1.89715		10598.1	11133.3	1.15829
S648A C2.1	13656.1	0.671606		34984	52090		1.91672		10848	16152.3	1.68046
S648D C3	14888.1	0.732193		60390.1	82478.4		3.0349		7640.27	10434.8	1.08561
PS120	15425	0.758599		5134.86	6768.87		0.24907		8755.68	11541.9	1.2008
n=4
WT C1	17442.4	1		30646.9	30646.9		1		8659.8	8659.8	1
F395Y C5	20166.3	1.15617		65668.8	56798.8		1.85333		11116	9614.54	1.11025
1K3R1D3E C6	19498.5	1.11787		63487.5	56793.1		1.85314		10396	9299.79	1.0739
S648A C2.1	17534.4	1.00527		42141.8	41920.6		1.36786		8578.05	8533.04	0.985362
S648D C3	20365	1.16756		74834.4	64094.8		2.0914		6831.44	5851.05	0.675657
PS120	Missing
n=5
WT C1	17679.5	1		50596	50596		1		7393.73	7393.73	1
F395Y C5	22904.3	1.29552		65722.2	50730.2		1.00265		9769.63	7541.06	1.01993
1K3R1D3E C6	20909.1	1.18267		59032.6	49914.6		0.986532		11848	10018	1.35493
S648A C2.1	17093.3	0.966839		43282.2	44766.7		0.884787		7000.32	7240.42	0.979264
S648D C3	18193.6	1.02908		61674.1	59931.5		1.18451		6360.49	6180.78	0.835949
PS120	15238.6	0.861935		702.021	814.471		0.0160975		4378.47	5079.81	0.687043
n=6
WT C1	15525.6	1		13016.5	13016.5		1		2975.5	2975.5	1
1K3R1D3E C6	16921	1.08988		12964.3	11895.2		0.913855		4195.15	3849.19	1.29363
S648A C2.1	17901.7	1.15304		16510.1	14318.7		1.10005		3575.2	3100.67	1.04207
S648D C3	18810.3	1.21157		19392.3	16005.9		1.22967		4742.86	3914.64	1.31563
PS120	14145	0.911079		355.607	390.314		0.0299862		5160.52	5664.19	1.90361
F395Y C5	18088.6	1.16508		12951	11115.9		0.85399		5004.57	4295.46	1.44361
AHB WT C2	14842.3	0.955992		11985.9	12537.6		0.963211		5854.83	6124.35	2.05826
Averages n=1-5	NHE1	CaM
WT C1	1	1
F395Y C5	1.97973	1.08813
1K3R1D3E C6	2.08665	1.24379
1Q2R3E C1	0	0
S648A C2.1	1.64416	1.30933
S648D C3	2.50741	0.784661
PS120	0.10943	1.21724
