# Supplementary material for: Dynamic Na+/H+ exchanger 1 (NHE1) – calmodulin complexes of varying stoichiometry and structure regulate Ca2+-dependent NHE1 activation
Source: eLife. 2021 Mar 3;10:e60889. doi: 10.7554/eLife.60889 (PMC8009664; doi:10.7554/eLife.60889)
Supplement: Figure 5—source data 2. [file elife-60889-fig5-data2.xlsx]

## Sheet: Ark1
WB quantification pH lysates n=1-8				Date:	2019-02-15		b-actin 2s	NHE1 2s	CaM 4s
n=1	b-actin	b-actin norm. to WT		NHE1	NHE1 norm. to its b-actin		NHE1 norm to WT		CaM	Norm. to its b-actin	Norm. to WT
WT C1	13409.4	1		47535.7	47535.7		1		7471.49	7471.49	1
1K3R1D3E C6	15232.2	1.13594		61913.5	54504.4		1.1466		11236.4	9891.74	1.32393
S648A C2.1	12622.5	0.941322		44493.6	47267.1		0.994349		7702.42	8182.55	1.09517
S648D C3	13422.9	1.00101		58577.7	58518.4		1.23104		9125.78	9116.55	1.22018
PS120	11111	0.8286		2073.92	2502.92		0.0526535		7342.88	8861.79	1.18608
F395Y C5	9800.22	0.730849		53690.5	73463.1		1.54543		6614.35	9050.22	1.2113
n=2
WT C1	10544.8	1		39660.3	39660.3		1		6837.3	6837.3	1
1K3R1D3E C6	10900.6	1.03374		53967.8	52206.2		1.31633		4929.28	4768.38	0.697407
S648A C2.1	9689.97	0.918938		39478.8	42961.3		1.08323		5640.35	6137.9	0.897708
S648D C3	10978.8	1.04116		50568	48569		1.22462		8488.37	8152.82	1.1924
PS120	9482.39	0.899252		1135.09	1262.26		0.0318268		7914.76	8801.5	1.28728
F395Y C5	10398.4	0.98612		46135.3	46784.6		1.17963		7166.76	7267.64	1.06294
n=3
WT C1	10632.7	1		41796.9	41796.9		1		5469.52	5469.52	1
1K3R1D3E C6	10246.7	0.963702		51817.6	53769.3		1.28644		7259.59	7533.03	1.37727
S648A C2.1	9328.32	0.877325		40881.9	46598.3		1.11487		7103.83	8097.15	1.48041
S648D C3	11357.4	1.06816		62973.8	58955.5		1.41052		8454.42	7914.95	1.4471
PS120	10930	1.02796		549.607	534.658		0.0127918		5854.1	5694.87	1.0412
F395Y C5	10929.8	1.02794		56809	55264.7		1.32222		5936.93	5775.54	1.05595
n=4
WT C1	16353.9	1		40466.5	40466.5		1		7176.1	7176.1	1
1K3R1D3E C6	17542.9	1.0727		39673.2	36984.3		0.913949		8289.35	7727.52	1.07684
S648A C2.1	18567	1.13532		46470.4	40931.4		1.01149		7309.93	6438.63	0.897232
S648D C3	19593	1.19806		54030.3	45098.2		1.11446		8590.88	7170.65	0.99924
PS120	16791.6	1.02676		1427.92	1390.7		0.0343667		6878.59	6699.28	0.933555
F395Y C5	19902.7	1.217		63593.1	52253.9		1.29129		6997.18	5749.53	0.801204
n=5	b-actin	b-actin norm. to WT		NHE1	NHE1 norm. to its b-actin		NHE1 norm to WT		CaM	Norm. to its b-actin	Norm. to WT
WT C1	12566.4	1		71353.5	71353.5		1		4927.4	4927.4	1
1K3R1D3E C6	17382.7	1.38328		72588.2	52475.6		0.735431		6121.4	4425.29	0.898099
S648A C2.1	14987	1.19263		53678.2	45008.3		0.630779		5654.28	4741.02	0.962175
S648D C3	16475	1.31104		100009	76281.7		1.06907		5704.28	4350.95	0.883011
PS120	14344.9	1.14153		3355.99	2939.9		0.0412019		7482.1	6554.44	1.3302
F395Y C5	15668.4	1.24685		72584.5	58214.2		0.815856		7918.81	6351.04	1.28892
n=6	b-actin	b-actin norm. to WT		NHE1	NHE1 norm. to its b-actin		NHE1 norm to WT		CaM	Norm. to its b-actin	Norm. to WT
WT C1	10536.5	1		63753.9	63753.9		1		7840.05	7840.05	1
1K3R1D3E C6	11098.6	1.05335		88249.4	83780.2		1.31412		8630.47	8193.39	1.04507
S648A C2.1	11240.8	1.06684		64238.1	60213.5		0.944468		5702.4	5345.14	0.681773
S648D C3	14289.8	1.35622		109607	80818.3		1.26766		6352.52	4683.99	0.597444
No PS120 sample
F395Y C5	13018.7	1.23557		89321.4	72291.5		1.13391		6584.1	5328.79	0.679687
n=7
WT C1	10244.6	1		77232.9	77232.9		1		5148.4	5148.4	1
1K3R1D3E C6	11113.3	1.0848		66367.4	61179.2		0.792139		4853.62	4474.19	0.869046
S648A C2.1	9571.73	0.934323		61311.4	65621.2		0.849653		5493.62	5879.78	1.14206
S648D C3	12636.4	1.23348		98776.6	80079.8		1.03686		8035.98	6514.9	1.26542
PS120	11589.2	1.13126		4156.48	3674.21		0.0475731		6684.15	5908.6	1.14766
F395Y C5	12962.1	1.26527		85928.4	67913.1		0.879329		6516.33	5150.15	1.00034
n=8
WT C1	13676.7	1		68508.2	68508.2		1		7475.57	7475.57	1
1K3R1D3E C6	12265.9	0.896853		31445.2	35061.7		0.511789		7900.4	8809.02	1.17837
S648A C2.1	13195.8	0.964843		59520.5	61689.3		0.900465		6698.4	6942.47	0.928688
S648D C3	16042.3	1.17297		86578.4	73811.3		1.07741		7605.1	6483.64	0.86731
PS120	14847.5	1.08561		814.263	750.05		0.0109483		8844.05	8146.61	1.08976
F395Y C5	15343.9	1.12191		67899.7	60521.7		0.883423		7797.12	6949.89	0.929681
