# Supplementary material for: Dynamic Na+/H+ exchanger 1 (NHE1) – calmodulin complexes of varying stoichiometry and structure regulate Ca2+-dependent NHE1 activation
Source: eLife. 2021 Mar 3;10:e60889. doi: 10.7554/eLife.60889 (PMC8009664; doi:10.7554/eLife.60889)
Supplement: Figure 5—source data 4. [file elife-60889-fig5-data4.xlsx]

## Sheet: Fig 5e SSpHi
pH exp SSpHi		n=1-4
n	condition	pH
n=1	WT	7.44
n=1	1K3R1D3E	7.42
n=1	S648A	7.55
n=1	S648D	7.42
n=1	Untransf.	7.44
n=1	F395Y	7.41
n=2	WT	7.4
n=2	1K3R1D3E	7.33
n=2	S648A	7.41
n=2	S648D	7.34
n=2	Untransf.	7.42
n=2	F395Y	7.31
n=3	WT	7.4
n=3	1K3R1D3E	7.33
n=3	S648A	7.48
n=3	S648D	7.3
n=3	Untransf.	7.35
n=3	F395Y	7.34
n=4	WT	7.36
n=4	1K3R1D3E	7.34
n=4	S648A	7.42
n=4	S648D	7.22
n=4	Untransf.	7.25
n=4	F395Y	7.32

## Sheet: Fig 5g acid
pH exp acid		n=1-6
n	condition	f'(x) pH/s	Calculated by linear model pH/S
n=1	WT	0.005102
n=1	1K3R1D3E	0.005635
n=1	S648A	0.01084
n=1	S648D	0.006822
n=1	Untransf.	-	-
n=2	WT	-	0.005833
n=2	1K3R1D3E	-	0.00695
n=2	S648A	0.016081
n=2	S648D	-	-
n=2	Untransf.	-	-
n=3	WT	0.007599
n=3	1K3R1D3E	0.009721
n=3	S648A	0.018509
n=3	S648D	0.00794
n=3	Untransf.	-	0.000717
n=3
n=4	WT	0.008056
n=4	1K3R1D3E	0.006287
n=4	S648A	0.011995
n=4	S648D	0.00825
n=4	Untransf.	-	0.000317
n=4
n=5	WT	0.015559
n=5	1K3R1D3E	0.007917
n=5	S648A	-	0.01155
n=5	S648D	0.008116
n=5	Untransf.	-	0.000117
n=5
n=6	WT	0.009994
n=6	1K3R1D3E	-	0.006317
n=6	S648A	0.006087
n=6	S648D	0.003999
n=6	Untransf.	-	0.000583
n=6

## Sheet: Fig 5i acid iono
pH exp acid+iono		n=1-8
n	condition	f'(x) pH/s	Calculated by linear model pH/S
n=1	WT vehicle	0.004886
n=1	WT	0.016693
n=1	1K3R1D3E	0.004739
n=1	S648A	-	-
n=1	S648D	0.006023
n=1	Untransf.	-	-
n=2	WT vehicle	-	-
n=2	WT	0.011109
n=2	1K3R1D3E	-	0.00455
n=2	S648A	0.019335
n=2	S648D	0.010421
n=2	Untransf.	-	0.00195
n=3	WT vehicle	0.014714
n=3	WT	0.025141
n=3	1K3R1D3E	0.010156
n=3	S648A	0.0114
n=3	S648D	-	-
n=3	Untransf.	-	0.001033
n=4	WT vehicle	-	-
n=4	WT	-	-
n=4	1K3R1D3E	-	-
n=4	S648A	-	-
n=4	S648D	-	-
n=4	Untransf.	-	-
n=5	WT vehicle	0.006679
n=5	WT	-	-
n=5	1K3R1D3E	-	-
n=5	S648A	0.017455
n=5	S648D	0.01165
n=5	Untransf.	-	0.0034
n=6	WT vehicle	0.01239
n=6	WT	-	-
n=6	1K3R1D3E	-	-
n=6	S648A	-	-
n=6	S648D	-	-
n=6	Untransf.	-	-
n=7	WT vehicle	0.018422
n=7	WT	0.043058
n=7	1K3R1D3E	-	0.009783
n=7	S648A	0.013351
n=7	S648D	0.006183
n=7	Untransf.	-	0.003817
n=8	WT vehicle	0.004881
n=8	WT	0.013908
n=8	1K3R1D3E	0.010674
n=8	S648A	0.01426
n=8	S648D	-	-
n=8	Untransf.	-	-
