# Supplementary material for: Dynamic Na+/H+ exchanger 1 (NHE1) – calmodulin complexes of varying stoichiometry and structure regulate Ca2+-dependent NHE1 activation
Source: eLife. 2021 Mar 3;10:e60889. doi: 10.7554/eLife.60889 (PMC8009664; doi:10.7554/eLife.60889)
Supplement: Figure 6—source data 1. [file elife-60889-fig6-data1.xlsx]

## Sheet: Combined
	PLA dots per cell:
		ps120	ps120 iono	wt	wt iono	1k3r	1k3r iono	s648a	s648a iono	s648d	s648d iono
	n1	0.228448	0.146947	4.14512	10.328	4.45067	12.3179	15.6761	8.99174	8.0407	6.4901
	n2	0.179153	0.196491	7.69831	2.86179	5.76955	10.3032	6.97947	3.87052	7.42587	5.04049
	n3	0.139535	0.124122	6.05487	5.23592	11.6086	7.43614	3.14135	3.31502	3.75776	2.46117
	n4	0.111111	0.113614	2.30962	3.25992	2.31633	5.29469	0.887955	5.05911	13.725	2.08898
	Average cell size (um^2)
	PS120	257.11
	PS120 iono	337.134
	WT	446.866
	WT iono	424.147
	1K3R	489.586
	1k3R iono	647.92
	S648A	562.79
	S648A iono	567.982
	S648D	585.925
	S648D iono	538.341
	PLA dots/area (um^2)
		ps120	ps120 iono	wt	wt iono	1k3r	1k3r iono	s648a	s648a iono	s648d	s648d iono
	n1	0.000888523	0.00043587	0.00927598	0.02435	0.00909069	0.0190114	0.0278542	0.015831	0.0137231	0.0120557
	n2	0.000696796	0.000582828	0.0172273	0.00674716	0.0117846	0.015902	0.0124016	0.00681451	0.0126738	0.00936301
	n3	0.000542705	0.000368167	0.0135496	0.0123446	0.023711	0.0114769	0.00558175	0.00583648	0.00641339	0.00457177
	n4	0.000432154	0.000337	0.00516849	0.00768582	0.00473119	0.00817182	0.00157777	0.00890717	0.0234245	0.00388041
	Normalised PLA dots/area
		ps120	ps120 iono	wt	wt iono	1k3r	1k3r iono	s648a	s648a iono	s648d	s648d iono
	n1	1	0.490555	10.4398	27.405	10.2312	21.3966	31.3488	17.8172	15.4448	13.5683
	n2	1	0.655951	19.3887	7.59367	13.2631	17.8971	13.9575	7.66948	14.2638	10.5377
	n3	1	0.414359	15.2496	13.8934	26.6858	12.9169	6.28205	6.56874	7.21803	5.14536
	n4	1	0.379281	5.81694	8.6501	5.32478	9.19708	1.77572	10.0247	26.3634	4.36726

## Sheet: n1
n1
PS120 control					WT control				1K3R control				S648A control				S648D control
Nuclei count		PLA count			Nuclei count		PLA count		Nuclei count		PLA count		Nuclei count		PLA count		Nuclei count		PLA count
Slice	Count	Slice	Count		Slice	Count	Slice	Count	Slice	Count	Slice	Count	Slice	Count	Slice	Count	Slice	Count	Slice	Count
Image_1258.tif	27	Image_1259.tif	3		Image_1304.tif	25	Image_1305.tif	110	Image_1374.tif	29	Image_1375.tif	100	Image_1414.tif	15	Image_1415.tif	253	Image_1452.tif	12	Image_1453.tif	159
Image_1260.tif	23	Image_1261.tif	7		Image_1306.tif	28	Image_1307.tif	31	Image_1376.tif	16	Image_1377.tif	41	Image_1416.tif	20	Image_1417.tif	226	Image_1454.tif	18	Image_1455.tif	159
Image_1262.tif	15	Image_1263.tif	7		Image_1308.tif	23	Image_1309.tif	48	Image_1378.tif	33	Image_1379.tif	131	Image_1418.tif	30	Image_1419.tif	240	Image_1456.tif	17	Image_1457.tif	88
Image_1264.tif	35	Image_1265.tif	10		Image_1310.tif	18	Image_1311.tif	23	Image_1380.tif	15	Image_1381.tif	111	Image_1420.tif	19	Image_1421.tif	181	Image_1458.tif	22	Image_1459.tif	75
Image_1266.tif	22	Image_1267.tif	5		Image_1312.tif	19	Image_1313.tif	37	Image_1382.tif	12	Image_1383.tif	28	Image_1422.tif	26	Image_1423.tif	301	Image_1460.tif	22	Image_1461.tif	97
Image_1268.tif	23	Image_1269.tif	2		Image_1314.tif	17	Image_1315.tif	67	Image_1384.tif	23	Image_1385.tif	105	Image_1424.tif	26	Image_1425.tif	371	Image_1462.tif	15	Image_1463.tif	135
Image_1270.tif	44	Image_1271.tif	2		Image_1316.tif	10	Image_1317.tif	65	Image_1386.tif	23	Image_1387.tif	113	Image_1426.tif	13	Image_1427.tif	274	Image_1464.tif	22	Image_1465.tif	99
Image_1272.tif	13	Image_1273.tif	6		Image_1318.tif	23	Image_1319.tif	27	Image_1388.tif	20	Image_1389.tif	74	Image_1428.tif	25	Image_1429.tif	535	Image_1466.tif	25	Image_1467.tif	143
Image_1274.tif	47	Image_1275.tif	9		Image_1320.tif	12	Image_1321.tif	28	Image_1390.tif	26	Image_1391.tif	97	Image_1430.tif	35	Image_1431.tif	691	Image_1468.tif	6	Image_1469.tif	59
Image_1276.tif	33	Image_1277.tif	5		Image_1322.tif	11	Image_1323.tif	25	Image_1392.tif	26	Image_1393.tif	233	Image_1432.tif	28	Image_1433.tif	387	Image_1470.tif	11	Image_1471.tif	153
Image_1278.tif	26	Image_1279.tif	2		Image_1324.tif	12	Image_1325.tif	30	Image_1394.tif	26	Image_1395.tif	278	Image_1434.tif	21	Image_1435.tif	294	Image_1472.tif	18	Image_1473.tif	108
Image_1280.tif	35	Image_1281.tif	4		Image_1326.tif	16	Image_1327.tif	78	Image_1396.tif	21	Image_1397.tif	85	Image_1436.tif	17	Image_1437.tif	234	Image_1474.tif	16	Image_1475.tif	140
Image_1282.tif	20	Image_1283.tif	7		Image_1328.tif	12	Image_1329.tif	47	Image_1398.tif	24	Image_1399.tif	82	Image_1438.tif	49	Image_1439.tif	1106	Image_1476.tif	21	Image_1477.tif	179
Image_1284.tif	43	Image_1285.tif	12		Image_1330.tif	29	Image_1331.tif	85	Image_1400.tif	21	Image_1401.tif	54	Image_1440.tif	20	Image_1441.tif	390	Image_1478.tif	12	Image_1479.tif	86
Image_1286.tif	58	Image_1287.tif	9		Image_1332.tif	38	Image_1333.tif	169	Image_1402.tif	22	Image_1403.tif	152	Image_1442.tif	11	Image_1443.tif	187	Image_1480.tif	24	Image_1481.tif	292
Image_1288.tif	27	Image_1289.tif	7		Image_1334.tif	36	Image_1335.tif	197	Image_1404.tif	16	Image_1405.tif	73	Image_1444.tif	25	Image_1445.tif	379	Image_1482.tif	21	Image_1483.tif	218
Image_1290.tif	12	Image_1291.tif	2		Image_1336.tif	44	Image_1337.tif	316	Image_1406.tif	24	Image_1407.tif	57	Image_1446.tif	22	Image_1447.tif	184	Image_1484.tif	17	Image_1485.tif	150
Image_1292.tif	21	Image_1293.tif	2		Image_1338.tif	33	Image_1339.tif	180	Image_1408.tif	20	Image_1409.tif	54	Image_1448.tif	11	Image_1449.tif	141	Image_1486.tif	34	Image_1487.tif	287
Image_1294.tif	55	Image_1295.tif	9		Image_1340.tif	30	Image_1341.tif	196	Image_1410.tif	28	Image_1411.tif	61	Image_1450.tif	13	Image_1451.tif	304	Image_1488.tif	11	Image_1489.tif	139
Image_1296.tif	29	Image_1297.tif	16		Image_1342.tif	33	Image_1343.tif	72	Image_1412.tif	21	Image_1413.tif	56
Image_1298.tif	17	Image_1299.tif	8		Image_1344.tif	29	Image_1345.tif	50
Image_1300.tif	43	Image_1301.tif	18		Image_1346.tif	25	Image_1347.tif	15
Image_1302.tif	28	Image_1303.tif	7		Image_1348.tif	29	Image_1349.tif	31
					Image_1350.tif	23	Image_1351.tif	24
					Image_1352.tif	15	Image_1353.tif	56
					Image_1354.tif	21	Image_1355.tif	93
					Image_1356.tif	24	Image_1357.tif	98
					Image_1358.tif	21	Image_1359.tif	90
					Image_1360.tif	24	Image_1361.tif	130
					Image_1362.tif	19	Image_1363.tif	162
					Image_1364.tif	23	Image_1365.tif	209
					Image_1366.tif	32	Image_1367.tif	392
					Image_1368.tif	22	Image_1369.tif	154
					Image_1370.tif	19	Image_1371.tif	38
					Image_1372.tif	25	Image_1373.tif	26
Average	30.2609		6.91304			23.4286		97.1143		22.3		99.25		22.4211		351.474		18.1053		145.579
PLA/cell	0.228448					4.14512				4.45067				15.6761				8.0407
PS120 ionomycin					WT ionomycin				1K3R ionomycin				S648A ionomycin				S648D ionomycin
Nuclei count		PLA count			Nuclei count		PLA count		Nuclei count		PLA count		Nuclei count		PLA count		Nuclei count		PLA count
Slice	Count	Slice	Count		Slice	Count	Slice	Count	Slice	Count	Slice	Count	Slice	Count	Slice	Count	Slice	Count	Slice	Count
Image_1490.tif	24	Image_1491.tif	7		Image_1530.tif	11	Image_1531.tif	43	Image_1570.tif	18	Image_1571.tif	377	Image_1608.tif	18	Image_1609.tif	260	Image_1642.tif	19	Image_1643.tif	102
Image_1492.tif	34	Image_1493.tif	3		Image_1532.tif	15	Image_1533.tif	29	Image_1572.tif	8	Image_1573.tif	117	Image_1610.tif	11	Image_1611.tif	123	Image_1644.tif	19	Image_1645.tif	123
Image_1494.tif	17	Image_1495.tif	2		Image_1534.tif	13	Image_1535.tif	36	Image_1574.tif	7	Image_1575.tif	187	Image_1612.tif	13	Image_1613.tif	130	Image_1646.tif	23	Image_1647.tif	260
Image_1496.tif	16	Image_1497.tif	3		Image_1536.tif	30	Image_1537.tif	115	Image_1576.tif	21	Image_1577.tif	307	Image_1614.tif	10	Image_1615.tif	138	Image_1648.tif	28	Image_1649.tif	189
Image_1498.tif	24	Image_1499.tif	2		Image_1538.tif	26	Image_1539.tif	41	Image_1578.tif	22	Image_1579.tif	280	Image_1616.tif	12	Image_1617.tif	51	Image_1650.tif	16	Image_1651.tif	188
Image_1500.tif	8	Image_1501.tif	2		Image_1540.tif	26	Image_1541.tif	54	Image_1580.tif	11	Image_1581.tif	82	Image_1618.tif	10	Image_1619.tif	99	Image_1652.tif	9	Image_1653.tif	66
Image_1502.tif	44	Image_1503.tif	11		Image_1542.tif	15	Image_1543.tif	20	Image_1582.tif	10	Image_1583.tif	166	Image_1620.tif	15	Image_1621.tif	170	Image_1654.tif	10	Image_1655.tif	89
Image_1504.tif	21	Image_1505.tif	1		Image_1544.tif	24	Image_1545.tif	58	Image_1584.tif	18	Image_1585.tif	145	Image_1622.tif	25	Image_1623.tif	328	Image_1656.tif	28	Image_1657.tif	146
Image_1506.tif	16	Image_1507.tif	2		Image_1546.tif	32	Image_1547.tif	140	Image_1586.tif	15	Image_1587.tif	67	Image_1624.tif	17	Image_1625.tif	104	Image_1658.tif	31	Image_1659.tif	336
Image_1508.tif	40	Image_1509.tif	2		Image_1548.tif	29	Image_1549.tif	162	Image_1588.tif	19	Image_1589.tif	204	Image_1626.tif	13	Image_1627.tif	99	Image_1660.tif	18	Image_1661.tif	114
Image_1510.tif	26	Image_1511.tif	3		Image_1550.tif	35	Image_1551.tif	396	Image_1590.tif	11	Image_1591.tif	103	Image_1628.tif	22	Image_1629.tif	238	Image_1662.tif	17	Image_1663.tif	56
Image_1512.tif	18	Image_1513.tif	1		Image_1552.tif	11	Image_1553.tif	59	Image_1592.tif	12	Image_1593.tif	165	Image_1630.tif	10	Image_1631.tif	56	Image_1664.tif	23	Image_1665.tif	150
Image_1514.tif	27	Image_1515.tif	6		Image_1554.tif	21	Image_1555.tif	33	Image_1594.tif	19	Image_1595.tif	218	Image_1632.tif	9	Image_1633.tif	42	Image_1666.tif	17	Image_1667.tif	111
Image_1516.tif	16	Image_1517.tif	6		Image_1556.tif	58	Image_1557.tif	775	Image_1596.tif	18	Image_1597.tif	115	Image_1634.tif	15	Image_1635.tif	107	Image_1668.tif	21	Image_1669.tif	157
Image_1518.tif	37	Image_1519.tif	7		Image_1558.tif	45	Image_1559.tif	638	Image_1598.tif	7	Image_1599.tif	83	Image_1636.tif	14	Image_1637.tif	135	Image_1671.tif	28	Image_1672.tif	244
Image_1520.tif	23	Image_1521.tif	4		Image_1560.tif	10	Image_1561.tif	140	Image_1600.tif	8	Image_1601.tif	64	Image_1638.tif	11	Image_1639.tif	44	Image_1673.tif	10	Image_1674.tif	47
Image_1522.tif	41	Image_1523.tif	8		Image_1562.tif	46	Image_1563.tif	1235	Image_1602.tif	20	Image_1603.tif	260	Image_1640.tif	17	Image_1641.tif	52	Image_1675.tif	14	Image_1676.tif	55
Image_1524.tif	36	Image_1525.tif	1		Image_1564.tif	64	Image_1565.tif	1213	Image_1604.tif	18	Image_1605.tif	251					Image_1677.tif	21	Image_1678.tif	47
Image_1526.tif	34	Image_1527.tif	1		Image_1566.tif	21	Image_1567.tif	119	Image_1606.tif	18	Image_1607.tif	258					Image_1679.tif	29	Image_1680.tif	111
Image_1528.tif	22	Image_1529.tif	5		Image_1568.tif	29	Image_1569.tif	488									Image_1681.tif	14	Image_1682.tif	15
																	Image_1683.tif	9	Image_1684.tif	16
Average	26.2		3.85			28.05		289.7		14.7368		181.526		14.2353		128		19.2381		124.857
PLA/cell	0.146947					10.328				12.3179				8.99174				6.4901

## Sheet: n2
n2
PS120 control					WT control				1K3R control				S648A control				S648D control
Nuclei count		PLA count			Nuclei count		PLA count		Nuclei count		PLA count		Nuclei count		PLA count		Nuclei count		PLA count
Slice	Count	Slice	Count		Slice	Count	Slice	Count	Slice	Count	Slice	Count	Slice	Count	Slice	Count	Slice	Count	Slice	Count
Image_2170.tif	83	Image_2171.tif	10		Image_2200.tif	34	Image_2201.tif	115	Image_2248.tif	54	Image_2249.tif	467	Image_2290.tif	40	Image_2291.tif	126	Image_2332.tif	43	Image_2333.tif	323
Image_2172.tif	78	Image_2173.tif	15		Image_2202.tif	25	Image_2203.tif	180	Image_2250.tif	22	Image_2251.tif	40	Image_2292.tif	41	Image_2293.tif	246	Image_2334.tif	22	Image_2335.tif	62
Image_2174.tif	76	Image_2175.tif	4		Image_2204.tif	27	Image_2205.tif	131	Image_2252.tif	33	Image_2253.tif	142	Image_2294.tif	43	Image_2295.tif	269	Image_2336.tif	35	Image_2337.tif	83
Image_2176.tif	47	Image_2177.tif	5		Image_2206.tif	15	Image_2207.tif	49	Image_2254.tif	33	Image_2255.tif	224	Image_2296.tif	42	Image_2297.tif	505	Image_2338.tif	28	Image_2339.tif	86
Image_2178.tif	86	Image_2179.tif	9		Image_2208.tif	20	Image_2209.tif	159	Image_2256.tif	42	Image_2257.tif	216	Image_2298.tif	33	Image_2299.tif	348	Image_2340.tif	27	Image_2341.tif	174
Image_2180.tif	84	Image_2181.tif	17		Image_2210.tif	22	Image_2211.tif	156	Image_2258.tif	32	Image_2259.tif	113	Image_2300.tif	40	Image_2301.tif	248	Image_2342.tif	19	Image_2343.tif	54
Image_2182.tif	57	Image_2183.tif	24		Image_2212.tif	21	Image_2213.tif	68	Image_2260.tif	41	Image_2261.tif	250	Image_2302.tif	39	Image_2303.tif	628	Image_2344.tif	34	Image_2345.tif	167
Image_2184.tif	68	Image_2185.tif	15		Image_2214.tif	18	Image_2215.tif	56	Image_2262.tif	13	Image_2263.tif	62	Image_2304.tif	24	Image_2305.tif	143	Image_2346.tif	27	Image_2347.tif	158
Image_2186.tif	113	Image_2187.tif	19		Image_2216.tif	32	Image_2217.tif	194	Image_2264.tif	47	Image_2265.tif	300	Image_2306.tif	13	Image_2307.tif	67	Image_2348.tif	36	Image_2349.tif	305
Image_2188.tif	82	Image_2189.tif	19		Image_2218.tif	30	Image_2219.tif	111	Image_2266.tif	25	Image_2267.tif	61	Image_2308.tif	52	Image_2309.tif	136	Image_2350.tif	38	Image_2351.tif	260
Image_2190.tif	110	Image_2191.tif	23		Image_2220.tif	27	Image_2221.tif	154	Image_2268.tif	33	Image_2269.tif	194	Image_2310.tif	19	Image_2311.tif	70	Image_2353.tif	49	Image_2354.tif	546
Image_2192.tif	78	Image_2193.tif	10		Image_2222.tif	20	Image_2223.tif	100	Image_2270.tif	45	Image_2271.tif	382	Image_2312.tif	23	Image_2313.tif	99	Image_2355.tif	28	Image_2356.tif	200
Image_2194.tif	87	Image_2195.tif	20		Image_2224.tif	21	Image_2225.tif	115	Image_2272.tif	62	Image_2273.tif	273	Image_2314.tif	61	Image_2315.tif	314	Image_2357.tif	25	Image_2358.tif	161
Image_2196.tif	89	Image_2197.tif	15		Image_2226.tif	31	Image_2227.tif	260	Image_2274.tif	33	Image_2275.tif	128	Image_2316.tif	22	Image_2317.tif	328	Image_2359.tif	20	Image_2360.tif	115
Image_2198.tif	90	Image_2199.tif	15		Image_2228.tif	21	Image_2229.tif	152	Image_2276.tif	27	Image_2277.tif	166	Image_2318.tif	25	Image_2319.tif	131	Image_2361.tif	17	Image_2362.tif	48
					Image_2230.tif	20	Image_2231.tif	251	Image_2278.tif	21	Image_2279.tif	157	Image_2320.tif	28	Image_2321.tif	187	Image_2363.tif	20	Image_2364.tif	72
					Image_2232.tif	19	Image_2233.tif	257	Image_2280.tif	34	Image_2281.tif	240	Image_2322.tif	34	Image_2323.tif	463	Image_2365.tif	29	Image_2366.tif	108
					Image_2234.tif	33	Image_2235.tif	324	Image_2282.tif	40	Image_2283.tif	244	Image_2324.tif	17	Image_2325.tif	60	Image_2367.tif	30	Image_2368.tif	345
					Image_2236.tif	27	Image_2237.tif	198	Image_2284.tif	18	Image_2285.tif	103	Image_2326.tif	34	Image_2327.tif	150	Image_2369.tif	41	Image_2370.tif	454
					Image_2238.tif	29	Image_2239.tif	280	Image_2286.tif	27	Image_2287.tif	184	Image_2328.tif	39	Image_2329.tif	207	Image_2371.tif	31	Image_2372.tif	362
					Image_2240.tif	22	Image_2241.tif	395	Image_2288.tif	34	Image_2289.tif	185	Image_2330.tif	13	Image_2331.tif	35	Image_2373.tif	35	Image_2374.tif	625
					Image_2242.tif	26	Image_2243.tif	248
					Image_2244.tif	28	Image_2245.tif	314
					Image_2246.tif	22	Image_2247.tif	275
Average	81.8667		14.6667			24.5833		189.25		34.0952		196.714		32.4762		226.667		30.1905		224.19
PLA/cell	0.179153					7.69831				5.76955				6.97947				7.42587
PS120 ionomycin					WT ionomycin				1K3R ionomycin				S648A ionomycin				S648D ionomycin
Nuclei count		PLA count			Nuclei count		PLA count		Nuclei count		PLA count		Nuclei count		PLA count		Nuclei count		PLA count
Slice	Count	Slice	Count		Slice	Count	Slice	Count	Slice	Count	Slice	Count	Slice	Count	Slice	Count	Slice	Count	Slice	Count
Image_2375.tif	34	Image_2376.tif	5		Image_2601.tif	10	Image_2602.tif	25	Image_2637.tif	27	Image_2638.tif	521	Image_2687.tif	17	Image_2688.tif	73	Image_3216.tif	30	Image_3217.tif	56
Image_2377.tif	41	Image_2378.tif	8		Image_2603.tif	19	Image_2604.tif	71	Image_2639.tif	32	Image_2640.tif	144	Image_2689.tif	44	Image_2690.tif	163	Image_3218.tif	26	Image_3219.tif	80
Image_2379.tif	34	Image_2380.tif	10		Image_2605.tif	61	Image_2606.tif	321	Image_2641.tif	55	Image_2642.tif	426	Image_2691.tif	53	Image_2692.tif	170	Image_3220.tif	27	Image_3221.tif	293
Image_2381.tif	41	Image_2382.tif	5		Image_2607.tif	40	Image_2608.tif	77	Image_2643.tif	42	Image_2644.tif	253	Image_2693.tif	77	Image_2694.tif	479	Image_3222.tif	39	Image_3223.tif	212
Image_2383.tif	20	Image_2384.tif	14		Image_2609.tif	28	Image_2610.tif	133	Image_2645.tif	55	Image_2646.tif	547	Image_2695.tif	36	Image_2696.tif	132	Image_3224.tif	30	Image_3225.tif	214
Image_2385.tif	15	Image_2386.tif	2		Image_2611.tif	26	Image_2612.tif	77	Image_2647.tif	53	Image_2648.tif	348	Image_2697.tif	33	Image_2698.tif	90	Image_3226.tif	39	Image_3227.tif	453
Image_2387.tif	51	Image_2388.tif	5		Image_2613.tif	21	Image_2614.tif	42	Image_2649.tif	54	Image_2650.tif	646	Image_2699.tif	31	Image_2700.tif	126	Image_3228.tif	29	Image_3229.tif	78
Image_2389.tif	50	Image_2390.tif	8		Image_2615.tif	20	Image_2616.tif	39	Image_2651.tif	43	Image_2652.tif	531	Image_2701.tif	55	Image_2702.tif	269	Image_3230.tif	24	Image_3231.tif	86
Image_2391.tif	48	Image_2392.tif	12		Image_2617.tif	23	Image_2618.tif	45	Image_2653.tif	41	Image_2654.tif	248	Image_2703.tif	77	Image_2704.tif	357	Image_3232.tif	22	Image_3233.tif	83
Image_2393.tif	47	Image_2394.tif	10		Image_2619.tif	23	Image_2620.tif	31	Image_2655.tif	72	Image_2656.tif	699	Image_2705.tif	76	Image_2706.tif	256	Image_3234.tif	24	Image_3235.tif	105
Image_2395.tif	48	Image_2396.tif	17		Image_2621.tif	18	Image_2622.tif	29	Image_2657.tif	11	Image_2658.tif	186	Image_2707.tif	75	Image_2708.tif	279	Image_3236.tif	25	Image_3237.tif	151
Image_2397.tif	27	Image_2398.tif	5		Image_2623.tif	33	Image_2624.tif	40	Image_2659.tif	25	Image_2660.tif	150	Image_2709.tif	87	Image_2710.tif	282	Image_3238.tif	14	Image_3239.tif	94
Image_2399.tif	34	Image_2400.tif	5		Image_2625.tif	31	Image_2626.tif	69	Image_2661.tif	34	Image_2662.tif	641	Image_2711.tif	64	Image_2712.tif	233	Image_3240.tif	23	Image_3241.tif	94
Image_2401.tif	49	Image_2402.tif	9		Image_2627.tif	16	Image_2628.tif	27	Image_2663.tif	55	Image_2664.tif	434	Image_2713.tif	51	Image_2714.tif	230	Image_3242.tif	25	Image_3243.tif	60
Image_2403.tif	62	Image_2404.tif	14		Image_2629.tif	30	Image_2630.tif	114	Image_2665.tif	33	Image_2666.tif	279	Image_2715.tif	58	Image_2716.tif	236	Image_3244.tif	22	Image_3245.tif	125
Image_2405.tif	84	Image_2406.tif	18		Image_2631.tif	33	Image_2632.tif	80	Image_2667.tif	19	Image_2668.tif	127	Image_2717.tif	82	Image_2718.tif	99	Image_3246.tif	20	Image_3247.tif	147
Image_2407.tif	62	Image_2408.tif	12		Image_2633.tif	33	Image_2634.tif	91	Image_2669.tif	40	Image_2670.tif	662	Image_2719.tif	68	Image_2720.tif	271	Image_3248.tif	22	Image_3249.tif	62
Image_2409.tif	38	Image_2410.tif	6		Image_2635.tif	27	Image_2636.tif	97	Image_2671.tif	45	Image_2672.tif	792	Image_2721.tif	29	Image_2722.tif	178	Image_3250.tif	37	Image_3251.tif	159
Image_2411.tif	34	Image_2412.tif	2						Image_2673.tif	39	Image_2674.tif	351	Image_2723.tif	76	Image_2724.tif	292	Image_3252.tif	25	Image_3253.tif	104
Image_2413.tif	36	Image_2414.tif	1														Image_3254.tif	27	Image_3255.tif	47
																	Image_3256.tif	28	Image_3257.tif	61
																	Image_3258.tif	34	Image_3259.tif	211
																	Image_3260.tif	36	Image_3261.tif	177
																	Image_3262.tif	37	Image_3263.tif	171
																	Image_3264.tif	60	Image_3265.tif	202
																	Image_3266.tif	44	Image_3267.tif	198
																	Image_3268.tif	46	Image_3269.tif	385
Average	42.75		8.4			27.3333		78.2222		40.7895		420.263		57.3158		221.842		30.1852		152.148
PLA/cell	0.196491					2.86179				10.3032				3.87052				5.04049

## Sheet: n3
n3
PS120 control					WT control				1K3R control				S648A control				S648D control
Nuclei count		PLA count			Nuclei count		PLA count		Nuclei count		PLA count		Nuclei count		PLA count		Nuclei count		PLA count
Slice	Count	Slice	Count		Slice	Count	Slice	Count	Slice	Count	Slice	Count	Slice	Count	Slice	Count	Slice	Count	Slice	Count
Image_3405.tif	15	Image_3406.tif	5		Image_3456.tif	21	Image_3457.tif	84	Image_3506.tif	20	Image_3507.tif	131	Image_3539.tif	17	Image_3540.tif	50	Image_3591.tif	10	Image_3592.tif	49
Image_3407.tif	11	Image_3408.tif	6		Image_3458.tif	21	Image_3459.tif	116	Image_3508.tif	22	Image_3509.tif	170	Image_3541.tif	23	Image_3542.tif	80	Image_3593.tif	12	Image_3594.tif	43
Image_3409.tif	9	Image_3410.tif	2		Image_3460.tif	22	Image_3461.tif	81	Image_3510.tif	9	Image_3511.tif	254	Image_3543.tif	20	Image_3544.tif	30	Image_3595.tif	25	Image_3596.tif	137
Image_3411.tif	15	Image_3412.tif	2		Image_3462.tif	19	Image_3463.tif	53	Image_3512.tif	17	Image_3513.tif	139	Image_3545.tif	25	Image_3546.tif	105	Image_3597.tif	15	Image_3598.tif	59
Image_3413.tif	15	Image_3414.tif	2		Image_3464.tif	23	Image_3465.tif	93	Image_3514.tif	22	Image_3515.tif	357	Image_3547.tif	27	Image_3548.tif	108	Image_3599.tif	22	Image_3600.tif	37
Image_3415.tif	13	Image_3416.tif	1		Image_3466.tif	26	Image_3467.tif	103	Image_3516.tif	12	Image_3517.tif	25	Image_3549.tif	40	Image_3550.tif	130	Image_3601.tif	21	Image_3602.tif	57
Image_3417.tif	7	Image_3418.tif	2		Image_3468.tif	33	Image_3469.tif	190	Image_3518.tif	38	Image_3519.tif	354	Image_3551.tif	20	Image_3552.tif	51	Image_3603.tif	15	Image_3604.tif	54
Image_3419.tif	30	Image_3420.tif	2		Image_3470.tif	21	Image_3471.tif	91	Image_3520.tif	15	Image_3521.tif	148	Image_3553.tif	21	Image_3554.tif	64	Image_3605.tif	19	Image_3606.tif	46
Image_3421.tif	18	Image_3422.tif	1		Image_3472.tif	23	Image_3473.tif	91	Image_3522.tif	20	Image_3523.tif	354	Image_3555.tif	12	Image_3556.tif	63	Image_3607.tif	27	Image_3608.tif	63
Image_3423.tif	36	Image_3424.tif	5		Image_3474.tif	16	Image_3475.tif	133	Image_3525.tif	17	Image_3526.tif	196	Image_3557.tif	15	Image_3558.tif	58	Image_3609.tif	18	Image_3610.tif	87
Image_3425.tif	27	Image_3426.tif	1		Image_3476.tif	26	Image_3477.tif	182	Image_3527.tif	27	Image_3528.tif	184	Image_3559.tif	37	Image_3560.tif	72	Image_3611.tif	24	Image_3612.tif	99
Image_3427.tif	8	Image_3428.tif	1		Image_3478.tif	28	Image_3479.tif	154	Image_3529.tif	20	Image_3530.tif	332	Image_3561.tif	27	Image_3562.tif	90	Image_3613.tif	24	Image_3614.tif	117
Image_3429.tif	11	Image_3430.tif	3		Image_3480.tif	19	Image_3481.tif	235	Image_3531.tif	20	Image_3532.tif	244	Image_3563.tif	31	Image_3564.tif	86	Image_3615.tif	25	Image_3616.tif	61
Image_3431.tif	18	Image_3432.tif	5		Image_3482.tif	21	Image_3483.tif	171	Image_3533.tif	31	Image_3534.tif	574	Image_3565.tif	33	Image_3566.tif	131	Image_3617.tif	18	Image_3618.tif	40
Image_3433.tif	14	Image_3434.tif	1		Image_3484.tif	17	Image_3485.tif	81	Image_3535.tif	22	Image_3536.tif	189	Image_3567.tif	20	Image_3568.tif	63	Image_3619.tif	13	Image_3620.tif	17
Image_3435.tif	31	Image_3436.tif	6		Image_3486.tif	18	Image_3487.tif	185	Image_3537.tif	15	Image_3538.tif	145	Image_3569.tif	18	Image_3570.tif	52	Image_3621.tif	23	Image_3622.tif	82
Image_3437.tif	11	Image_3438.tif	2		Image_3488.tif	22	Image_3489.tif	183					Image_3571.tif	16	Image_3572.tif	53	Image_3623.tif	23	Image_3624.tif	85
Image_3439.tif	45	Image_3440.tif	3		Image_3490.tif	28	Image_3491.tif	393					Image_3573.tif	31	Image_3574.tif	66	Image_3625.tif	29	Image_3626.tif	116
Image_3441.tif	53	Image_3442.tif	4		Image_3492.tif	18	Image_3493.tif	119					Image_3575.tif	35	Image_3576.tif	90	Image_3627.tif	16	Image_3628.tif	77
Image_3443.tif	26	Image_3444.tif	3		Image_3494.tif	23	Image_3495.tif	87					Image_3577.tif	22	Image_3578.tif	78	Image_3629.tif	27	Image_3630.tif	97
Image_3445.tif	27	Image_3446.tif	2		Image_3496.tif	30	Image_3497.tif	96					Image_3579.tif	37	Image_3580.tif	152	Image_3631.tif	23	Image_3632.tif	167
Image_3447.tif	24	Image_3448.tif	1		Image_3498.tif	18	Image_3499.tif	133					Image_3581.tif	27	Image_3582.tif	100	Image_3633.tif	25	Image_3634.tif	95
Image_3450.tif	17	Image_3451.tif	1		Image_3500.tif	28	Image_3501.tif	160					Image_3583.tif	23	Image_3584.tif	75	Image_3635.tif	29	Image_3636.tif	130
Image_3452.tif	24	Image_3453.tif	9		Image_3502.tif	16	Image_3503.tif	113					Image_3585.tif	23	Image_3586.tif	23
Image_3454.tif	11	Image_3455.tif	2		Image_3504.tif	28	Image_3505.tif	94					Image_3587.tif	38	Image_3588.tif	143
													Image_3589.tif	27	Image_3590.tif	76
Average	20.64		2.88			22.6		136.84		20.4375		237.25		25.5769		80.3462		21		78.913
PLA/cell	0.139535					6.05487				11.6086				3.14135				3.75776
PS120 ionomycin					WT ionomycin				1K3R ionomycin				S648A ionomycin				S648D ionomycin
Nuclei count		PLA count			Nuclei count		PLA count		Nuclei count		PLA count		Nuclei count		PLA count		Nuclei count		PLA count
Slice	Count	Slice	Count		Slice	Count	Slice	Count	Slice	Count	Slice	Count	Slice	Count	Slice	Count	Slice	Count	Slice	Count
Image_3637.tif	19	Image_3638.tif	1		Image_3672.tif	28	Image_3673.tif	103	Image_3720.tif	19	Image_3721.tif	114	Image_3318.tif	31	Image_3319.tif	75	Image_3270.tif	24	Image_3271.tif	69
Image_3639.tif	22	Image_3640.tif	2		Image_3674.tif	27	Image_3675.tif	57	Image_3722.tif	23	Image_3723.tif	56	Image_3320.tif	41	Image_3321.tif	92	Image_3272.tif	38	Image_3273.tif	93
Image_3641.tif	11	Image_3642.tif	1		Image_3676.tif	24	Image_3677.tif	141	Image_3724.tif	21	Image_3725.tif	172	Image_3322.tif	23	Image_3323.tif	73	Image_3274.tif	22	Image_3275.tif	42
Image_3643.tif	31	Image_3644.tif	4		Image_3678.tif	43	Image_3679.tif	158	Image_3726.tif	22	Image_3727.tif	109	Image_3324.tif	37	Image_3325.tif	123	Image_3276.tif	10	Image_3277.tif	25
Image_3645.tif	15	Image_3646.tif	1		Image_3680.tif	36	Image_3681.tif	244	Image_3728.tif	23	Image_3729.tif	124	Image_3326.tif	44	Image_3327.tif	124	Image_3278.tif	19	Image_3279.tif	37
Image_3647.tif	33	Image_3648.tif	3		Image_3682.tif	39	Image_3683.tif	198	Image_3730.tif	23	Image_3731.tif	246	Image_3328.tif	13	Image_3329.tif	66	Image_3280.tif	24	Image_3281.tif	53
Image_3649.tif	30	Image_3650.tif	2		Image_3684.tif	26	Image_3685.tif	60	Image_3732.tif	15	Image_3733.tif	125	Image_3330.tif	28	Image_3331.tif	104	Image_3282.tif	35	Image_3283.tif	85
Image_3651.tif	26	Image_3652.tif	1		Image_3686.tif	16	Image_3687.tif	164	Image_3734.tif	25	Image_3735.tif	104	Image_3332.tif	40	Image_3333.tif	113	Image_3284.tif	33	Image_3285.tif	58
Image_3653.tif	23	Image_3654.tif	4		Image_3688.tif	48	Image_3689.tif	245	Image_3736.tif	12	Image_3737.tif	109	Image_3334.tif	27	Image_3335.tif	92	Image_3286.tif	24	Image_3287.tif	90
Image_3655.tif	33	Image_3656.tif	1		Image_3690.tif	28	Image_3691.tif	86	Image_3738.tif	24	Image_3739.tif	213	Image_3336.tif	32	Image_3337.tif	145	Image_3288.tif	16	Image_3289.tif	74
Image_3657.tif	19	Image_3658.tif	2		Image_3692.tif	40	Image_3693.tif	220	Image_3741.tif	24	Image_3742.tif	132	Image_3338.tif	18	Image_3339.tif	97	Image_3290.tif	21	Image_3291.tif	71
Image_3659.tif	21	Image_3660.tif	5		Image_3694.tif	57	Image_3695.tif	244	Image_3743.tif	40	Image_3744.tif	452	Image_3340.tif	11	Image_3341.tif	41	Image_3292.tif	21	Image_3293.tif	51
Image_3661.tif	37	Image_3662.tif	6		Image_3696.tif	45	Image_3697.tif	245	Image_3745.tif	23	Image_3746.tif	197	Image_3342.tif	28	Image_3343.tif	100	Image_3294.tif	24	Image_3295.tif	26
Image_3663.tif	16	Image_3664.tif	1		Image_3698.tif	31	Image_3699.tif	104	Image_3747.tif	17	Image_3748.tif	125	Image_3344.tif	18	Image_3345.tif	77	Image_3296.tif	21	Image_3297.tif	39
Image_3665.tif	18	Image_3666.tif	2		Image_3700.tif	52	Image_3701.tif	165	Image_3749.tif	25	Image_3750.tif	93	Image_3346.tif	25	Image_3347.tif	76	Image_3298.tif	20	Image_3299.tif	51
Image_3667.tif	39	Image_3668.tif	11		Image_3702.tif	34	Image_3703.tif	149	Image_3751.tif	16	Image_3752.tif	49	Image_3348.tif	16	Image_3349.tif	48	Image_3300.tif	22	Image_3301.tif	72
Image_3669.tif	34	Image_3670.tif	6		Image_3704.tif	46	Image_3705.tif	190	Image_3753.tif	17	Image_3754.tif	157	Image_3350.tif	16	Image_3351.tif	49	Image_3302.tif	33	Image_3303.tif	135
					Image_3706.tif	27	Image_3707.tif	80	Image_3755.tif	21	Image_3756.tif	277	Image_3352.tif	36	Image_3353.tif	112	Image_3304.tif	22	Image_3305.tif	59
					Image_3708.tif	29	Image_3709.tif	80	Image_3757.tif	25	Image_3758.tif	232	Image_3354.tif	24	Image_3355.tif	103	Image_3306.tif	49	Image_3307.tif	65
					Image_3710.tif	37	Image_3711.tif	342					Image_3356.tif	24	Image_3357.tif	69	Image_3308.tif	33	Image_3309.tif	67
					Image_3712.tif	56	Image_3713.tif	401					Image_3358.tif	14	Image_3359.tif	31	Image_3310.tif	28	Image_3311.tif	55
					Image_3714.tif	54	Image_3715.tif	399									Image_3312.tif	34	Image_3313.tif	80
					Image_3716.tif	48	Image_3717.tif	349									Image_3314.tif	34	Image_3315.tif	108
					Image_3718.tif	70	Image_3719.tif	503									Image_3316.tif	24	Image_3317.tif	48
Average	25.1176		3.11765			39.2083		205.292		21.8421		162.421		26		86.1905		26.2917		64.7083
PLA/cell	0.124122					5.23592				7.43614				3.31502				2.46117

## Sheet: n4
n4
PS120 control					WT control				1K3R control				S648A control				S648D control
Nuclei count		PLA count			Nuclei count		PLA count		Nuclei count		PLA count		Nuclei count		PLA count		Nuclei count		PLA count
Slice	Count	Slice	Count		Slice	Count	Slice	Count	Slice	Count	Slice	Count	Slice	Count	Slice	Count	Slice	Count	Slice	Count
Image_3884.tif	24	Image_3885.tif	3		Image_3908.tif	17	Image_3909.tif	42	Image_3941.tif	13	Image_3942.tif	38	Image_3971.tif	10	Image_3972.tif	10	Image_4016.tif	18	Image_4017.tif	193
Image_3886.tif	11	Image_3887.tif	1		Image_3910.tif	12	Image_3911.tif	49	Image_3943.tif	20	Image_3944.tif	40	Image_3973.tif	24	Image_3974.tif	22	Image_4018.tif	19	Image_4019.tif	307
Image_3888.tif	16	Image_3889.tif	2		Image_3912.tif	14	Image_3913.tif	54	Image_3945.tif	37	Image_3946.tif	75	Image_3975.tif	17	Image_3976.tif	13	Image_4020.tif	27	Image_4021.tif	355
Image_3890.tif	44	Image_3891.tif	6		Image_3914.tif	13	Image_3915.tif	41	Image_3947.tif	25	Image_3948.tif	43	Image_3977.tif	18	Image_3978.tif	19	Image_4022.tif	25	Image_4023.tif	515
Image_3892.tif	11	Image_3893.tif	4		Image_3916.tif	8	Image_3917.tif	27	Image_3949.tif	21	Image_3950.tif	50	Image_3979.tif	11	Image_3980.tif	6	Image_4024.tif	28	Image_4025.tif	328
Image_3894.tif	67	Image_3895.tif	5		Image_3918.tif	17	Image_3919.tif	57	Image_3951.tif	19	Image_3952.tif	25	Image_3981.tif	17	Image_3982.tif	12	Image_4026.tif	27	Image_4027.tif	418
Image_3896.tif	34	Image_3897.tif	5		Image_3920.tif	20	Image_3921.tif	40	Image_3953.tif	39	Image_3954.tif	68	Image_3983.tif	15	Image_3984.tif	10	Image_4028.tif	32	Image_4029.tif	599
Image_3898.tif	49	Image_3899.tif	7		Image_3922.tif	12	Image_3923.tif	35	Image_3955.tif	23	Image_3956.tif	40	Image_3985.tif	11	Image_3986.tif	14	Image_4030.tif	34	Image_4031.tif	422
Image_3900.tif	23	Image_3901.tif	2		Image_3924.tif	19	Image_3925.tif	39	Image_3957.tif	13	Image_3958.tif	37	Image_3987.tif	11	Image_3988.tif	9	Image_4032.tif	27	Image_4033.tif	306
Image_3902.tif	64	Image_3903.tif	4		Image_3927.tif	13	Image_3928.tif	23	Image_3959.tif	12	Image_3960.tif	23	Image_3989.tif	9	Image_3990.tif	6	Image_4034.tif	24	Image_4035.tif	289
Image_3904.tif	29	Image_3905.tif	4		Image_3929.tif	17	Image_3930.tif	24	Image_3961.tif	45	Image_3962.tif	103	Image_3991.tif	22	Image_3992.tif	18	Image_4036.tif	20	Image_4037.tif	201
Image_3906.tif	51	Image_3907.tif	4		Image_3931.tif	16	Image_3932.tif	26	Image_3963.tif	27	Image_3964.tif	63	Image_3993.tif	20	Image_3994.tif	19	Image_4038.tif	20	Image_4039.tif	260
					Image_3933.tif	11	Image_3934.tif	11	Image_3965.tif	40	Image_3966.tif	158	Image_3995.tif	16	Image_3996.tif	14	Image_4040.tif	36	Image_4041.tif	606
					Image_3935.tif	16	Image_3936.tif	22	Image_3967.tif	35	Image_3968.tif	100	Image_3997.tif	9	Image_3998.tif	8	Image_4042.tif	32	Image_4043.tif	478
					Image_3937.tif	24	Image_3938.tif	46	Image_3969.tif	23	Image_3970.tif	45	Image_3999.tif	21	Image_4000.tif	27	Image_4044.tif	18	Image_4045.tif	239
					Image_3939.tif	10	Image_3940.tif	16					Image_4001.tif	18	Image_4002.tif	16	Image_4046.tif	30	Image_4047.tif	491
													Image_4003.tif	17	Image_4004.tif	19	Image_4048.tif	34	Image_4049.tif	575
													Image_4005.tif	14	Image_4006.tif	17	Image_4050.tif	34	Image_4051.tif	508
													Image_4007.tif	8	Image_4008.tif	13	Image_4052.tif	31	Image_4053.tif	221
													Image_4009.tif	21	Image_4010.tif	15	Image_4054.tif	44	Image_4055.tif	375
													Image_4011.tif	37	Image_4012.tif	21
													Image_4013.tif	11	Image_4014.tif	9
Average	35.25		3.91667			14.9375		34.5		26.1333		60.5333		16.2273		14.4091		28		384.3
PLA/cell	0.111111					2.30962				2.31633				0.887955				13.725
PS120 ionomycin					WT ionomycin				1K3R ionomycin				S648A ionomycin				S648D ionomycin
Nuclei count		PLA count			Nuclei count		PLA count		Nuclei count		PLA count		Nuclei count		PLA count		Nuclei count		PLA count
Slice	Count	Slice	Count		Slice	Count	Slice	Count	Slice	Count	Slice	Count	Slice	Count	Slice	Count	Slice	Count	Slice	Count
Image_4056.tif	66	Image_4057.tif	6		Image_4090.tif	41	Image_4091.tif	156	Image_4128.tif	30	Image_4129.tif	390	Image_4166.tif	17	Image_4167.tif	57	Image_4202.tif	11	Image_4203.tif	15
Image_4058.tif	34	Image_4059.tif	4		Image_4092.tif	43	Image_4093.tif	182	Image_4130.tif	23	Image_4131.tif	258	Image_4168.tif	17	Image_4169.tif	155	Image_4204.tif	21	Image_4205.tif	37
Image_4060.tif	43	Image_4061.tif	10		Image_4094.tif	24	Image_4095.tif	152	Image_4132.tif	31	Image_4133.tif	147	Image_4170.tif	20	Image_4171.tif	65	Image_4206.tif	22	Image_4207.tif	73
Image_4062.tif	46	Image_4063.tif	3		Image_4096.tif	18	Image_4097.tif	94	Image_4134.tif	32	Image_4135.tif	203	Image_4172.tif	28	Image_4173.tif	98	Image_4208.tif	21	Image_4209.tif	49
Image_4064.tif	64	Image_4065.tif	12		Image_4098.tif	42	Image_4099.tif	160	Image_4136.tif	28	Image_4137.tif	126	Image_4174.tif	17	Image_4175.tif	83	Image_4210.tif	22	Image_4211.tif	61
Image_4066.tif	92	Image_4067.tif	8		Image_4100.tif	17	Image_4101.tif	79	Image_4138.tif	36	Image_4139.tif	123	Image_4176.tif	18	Image_4177.tif	45	Image_4212.tif	27	Image_4213.tif	47
Image_4068.tif	56	Image_4069.tif	8		Image_4102.tif	48	Image_4103.tif	146	Image_4140.tif	40	Image_4141.tif	110	Image_4178.tif	28	Image_4179.tif	106	Image_4214.tif	31	Image_4215.tif	87
Image_4070.tif	60	Image_4071.tif	6		Image_4104.tif	27	Image_4105.tif	64	Image_4142.tif	42	Image_4143.tif	135	Image_4180.tif	22	Image_4181.tif	57	Image_4216.tif	24	Image_4217.tif	45
Image_4072.tif	43	Image_4073.tif	6		Image_4106.tif	31	Image_4107.tif	66	Image_4144.tif	71	Image_4145.tif	461	Image_4182.tif	22	Image_4183.tif	73	Image_4218.tif	37	Image_4219.tif	66
Image_4074.tif	83	Image_4075.tif	13		Image_4108.tif	19	Image_4109.tif	48	Image_4146.tif	50	Image_4147.tif	138	Image_4184.tif	14	Image_4185.tif	60	Image_4220.tif	19	Image_4221.tif	25
Image_4076.tif	91	Image_4077.tif	12		Image_4110.tif	16	Image_4111.tif	47	Image_4148.tif	47	Image_4149.tif	243	Image_4186.tif	15	Image_4187.tif	81	Image_4222.tif	26	Image_4223.tif	51
Image_4078.tif	63	Image_4079.tif	8		Image_4112.tif	21	Image_4113.tif	51	Image_4150.tif	44	Image_4151.tif	225	Image_4188.tif	18	Image_4189.tif	81	Image_4224.tif	27	Image_4225.tif	50
Image_4080.tif	35	Image_4081.tif	2		Image_4114.tif	30	Image_4115.tif	91	Image_4152.tif	41	Image_4153.tif	153	Image_4190.tif	36	Image_4191.tif	174	Image_4226.tif	24	Image_4227.tif	57
Image_4082.tif	66	Image_4083.tif	1		Image_4116.tif	22	Image_4117.tif	64	Image_4154.tif	44	Image_4155.tif	176	Image_4192.tif	33	Image_4193.tif	409	Image_4228.tif	23	Image_4229.tif	51
Image_4084.tif	78	Image_4085.tif	3		Image_4118.tif	22	Image_4119.tif	70	Image_4156.tif	63	Image_4157.tif	217	Image_4194.tif	24	Image_4195.tif	103	Image_4230.tif	26	Image_4231.tif	41
Image_4086.tif	42	Image_4087.tif	4		Image_4120.tif	18	Image_4121.tif	45	Image_4158.tif	61	Image_4159.tif	189	Image_4196.tif	35	Image_4197.tif	189	Image_4232.tif	15	Image_4233.tif	16
Image_4088.tif	59	Image_4089.tif	10		Image_4122.tif	20	Image_4123.tif	30	Image_4160.tif	63	Image_4161.tif	459	Image_4198.tif	29	Image_4199.tif	170	Image_4234.tif	16	Image_4235.tif	30
					Image_4124.tif	24	Image_4125.tif	41	Image_4162.tif	28	Image_4163.tif	160	Image_4200.tif	13	Image_4201.tif	48	Image_4236.tif	22	Image_4237.tif	39
					Image_4126.tif	21	Image_4127.tif	57	Image_4164.tif	54	Image_4165.tif	471					Image_4238.tif	14	Image_4239.tif	11
																	Image_4240.tif	30	Image_4241.tif	109
																	Image_4242.tif	14	Image_4243.tif	26
Average	60.0588		6.82353			26.5263		86.4737		43.5789		230.737		22.5556		114.111		22.4762		46.9524
PLA/cell	0.113614					3.25992				5.29469				5.05911				2.08898
		ps120	ps120 iono	wt	wt iono	1k3r	1k3r iono	s648a	s648a iono	s648d	s648d iono
	n1	0.228448	0.146947	4.14512	10.328	4.45067	12.3179	15.6761	8.99174	8.0407	6.4901
	n2	0.179153	0.196491	7.69831	2.86179	5.76955	10.3032	6.97947	3.87052	7.42587	5.04049
	n3	0.139535	0.124122	6.05487	5.23592	11.6086	7.43614	3.14135	3.31502	3.75776	2.46117
	n4	0.111111	0.113614	2.30962	3.25992	2.31633	5.29469	0.887955	5.05911	13.725	2.08898
