# Supplementary material for: Dynamic Na+/H+ exchanger 1 (NHE1) – calmodulin complexes of varying stoichiometry and structure regulate Ca2+-dependent NHE1 activation
Source: eLife. 2021 Mar 3;10:e60889. doi: 10.7554/eLife.60889 (PMC8009664; doi:10.7554/eLife.60889)
Supplement: Figure 6—source data 2. [file elife-60889-fig6-data2.xlsx]

## Sheet: Fig 6e Akti
pH exp Akti		n=1-4
n	condition	f'(x) pH/s	Calculated by linear model pH/S
n=1	WT vehicle	-	-
n=1	WT Akti	0.023907
n=1	1K3R1D3E vehicle	0.008571
n=1	1K3R1D3E Akti	0.009191
n=1	Untransf. Vehicle	-	0.0051
n=1	Untransf. Akti	-	-
n=2	WT vehicle	0.03271
n=2	WT Akti	0.030364
n=2	1K3R1D3E vehicle	0.016469
n=2	1K3R1D3E Akti	-	0.01435
n=2	Untransf. Vehicle	-	0.000967
n=2	Untransf. Akti	-	0.000983
n=3	WT vehicle	0.016397
n=3	WT Akti	0.019197
n=3	1K3R1D3E vehicle	0.017344
n=3	1K3R1D3E Akti	0.014166
n=3	Untransf. Vehicle	-	0.001633
n=3	Untransf. Akti	-	0.002783
n=4	WT vehicle	0.02162
n=4	WT Akti	0.036626
n=4	1K3R1D3E vehicle	-	0.01272
n=4	1K3R1D3E Akti	-	0.01385
n=4	Untransf. Vehicle	-	0.00115
n=4	Untransf. Akti	-	0.007667

## Sheet: Fig 6f PKCi
pH exp PKCi		n=1-4
n	condition	f'(x) pH/s	Calculated by linear model pH/S
n=1	WT iono	0.026784
n=1	WT BIM 5 uM	0.030467
n=1	WT Go 3 uM	0.027973
n=1	1K3R iono	0.009891
n=1	1K3R BIM 5 uM	0.018043
n=1	1K3R Go 3 uM	0.013102
n=2	WT iono	0.017934
n=2	WT BIM 5 uM	0.028937
n=2	WT Go 3 uM	0.027632
n=2	1K3R iono	0.012083
n=2	1K3R BIM 5 uM	0.004376
n=2	1K3R Go 3 uM	0.005022
n=3	WT iono	0.010266
n=3	WT BIM 5 uM	0.007832
n=3	WT Go 3 uM	0.005221
n=3	1K3R iono	0.00332
n=3	1K3R BIM 5 uM	0.006639
n=3	1K3R Go 3 uM	0.00632
n=4	WT iono	0.009257
n=4	WT BIM 5 uM	0.01149
n=4	WT Go 3 uM	0.010721
n=4	1K3R iono	0.003192	0.005983
n=4	1K3R BIM 5 uM	0.005125
n=4	1K3R Go 3 uM	-
