# Supplementary material for: Dynamic Na+/H+ exchanger 1 (NHE1) – calmodulin complexes of varying stoichiometry and structure regulate Ca2+-dependent NHE1 activation
Source: eLife. 2021 Mar 3;10:e60889. doi: 10.7554/eLife.60889 (PMC8009664; doi:10.7554/eLife.60889)
Supplement: Figure 6—source data 4. [file elife-60889-fig6-data4.xlsx]

## Sheet: Sheet1
ITC - CaM (10uM) + H1H2_pS648 (150uM)
run1							run2							run3
dH [µcal/injection]	InjV [uL]	c(pH1H2) [mM]	c(CaM) [mM]	molar ratio	dH/n [cal/mol]		dH [µcal/injection]	InjV [uL]	c(pH1H2) [mM]	c(CaM) [mM]	molar ratio	dH/n [cal/mol]		dH [µcal/injection]	InjV [uL]	c(pH1H2) [mM]	c(CaM) [mM]	molar ratio	dH/n [cal/mol]
-0.63994	0.5	0	0.01	0.03681	--		-0.78548	0.5	0	0.01	0.03681	--		-0.63798	0.5	0	0.01	0.03681	--
-5.28835	2	0.000367197	0.00998	0.18495	-17627.84193		-5.35075	2	0.000367197	0.00998	0.18495	-17835.83318		-5.2497	2	0.000367197	0.00998	0.18495	-17499.0111
-5.28126	2	0.00183	0.00988	0.33453	-17604.19494		-5.43628	2	0.00183	0.00988	0.33453	-18120.92102		-5.36075	2	0.00183	0.00988	0.33453	-17869.15822
-5.246	2	0.00327	0.00978	0.48556	-17486.66801		-5.37804	2	0.00327	0.00978	0.48556	-17926.81521		-5.39816	2	0.00327	0.00978	0.48556	-17993.85461
-5.2137	2	0.0047	0.00969	0.63802	-17378.99656		-5.30091	2	0.0047	0.00969	0.63802	-17669.69498		-5.38327	2	0.0047	0.00969	0.63802	-17944.24507
-5.09347	2	0.00612	0.00959	0.79193	-16978.23478		-5.27596	2	0.00612	0.00959	0.79193	-17586.52273		-5.29128	2	0.00612	0.00959	0.79193	-17637.61502
-4.57343	2	0.00752	0.0095	0.94728	-15244.77725		-4.72186	2	0.00752	0.0095	0.94728	-15739.54263		-4.8552	2	0.00752	0.0095	0.94728	-16183.9878
-3.69116	2	0.00891	0.00941	1.10407	-12303.86143		-3.39064	2	0.00891	0.00941	1.10407	-11302.1236		-3.44049	2	0.00891	0.00941	1.10407	-11468.30997
-3.14744	2	0.01028	0.00931	1.2623	-10491.47908		-3.04836	2	0.01028	0.00931	1.2623	-10161.19783		-2.96798	2	0.01028	0.00931	1.2623	-9893.28145
-2.81755	2	0.01164	0.00922	1.42197	-9391.82548		-2.78422	2	0.01164	0.00922	1.42197	-9280.73524		-2.80665	2	0.01164	0.00922	1.42197	-9355.50159
-2.55929	2	0.01299	0.00913	1.58309	-8530.96273		-2.52883	2	0.01299	0.00913	1.58309	-8429.43735		-2.5101	2	0.01299	0.00913	1.58309	-8366.98672
-2.26171	2	0.01432	0.00904	1.74565	-7539.04419		-2.23499	2	0.01432	0.00904	1.74565	-7449.983		-2.17816	2	0.01432	0.00904	1.74565	-7260.5476
-1.98391	2	0.01563	0.00895	1.90965	-6613.048		-1.88809	2	0.01563	0.00895	1.90965	-6293.63394		-1.91645	2	0.01563	0.00895	1.90965	-6388.16453
-1.68832	2	0.01693	0.00887	2.07509	-5627.73353		-1.57442	2	0.01693	0.00887	2.07509	-5248.05542		-1.59991	2	0.01693	0.00887	2.07509	-5333.04667
-1.41626	2	0.01822	0.00878	2.24197	-4720.85732		-1.36288	2	0.01822	0.00878	2.24197	-4542.91854		-1.31757	2	0.01822	0.00878	2.24197	-4391.89594
-1.20452	2	0.01949	0.00869	2.4103	-4015.07368		-1.05254	2	0.01949	0.00869	2.4103	-3508.46414		-1.16691	2	0.01949	0.00869	2.4103	-3889.69457
-0.97302	2	0.02075	0.00861	2.58006	-3243.39578		-0.96065	2	0.02075	0.00861	2.58006	-3202.16059		-0.96955	2	0.02075	0.00861	2.58006	-3231.83422
-0.66305	2	0.02199	0.00852	2.75127	-2210.16327		-0.78701	2	0.02199	0.00852	2.75127	-2623.36388		-0.81151	2	0.02199	0.00852	2.75127	-2705.02409
-0.56772	2	0.02322	0.00844	2.92392	-1892.39422		-0.66121	2	0.02322	0.00844	2.92392	-2204.02791		-0.69206	2	0.02322	0.00844	2.92392	-2306.86529
-0.44876	2	0.02444	0.00836	3.09801	-1495.85937		-0.6129	2	0.02444	0.00836	3.09801	-2042.98742		-0.603	2	0.02444	0.00836	3.09801	-2010.0107
	--	0.02564	0.00828	--				--	0.02564	0.00828	--				--	0.02564	0.00828	--
